# Supplementary material
Source: MDPI journal article supplement (https://www.mdpi.com/2075-163X/12/6/775)
Supplement: s1 [file s1]

Archive with 7 entries (7 files):
- Supplem Mat A_epma_cpx_ol_revised.xlsx
- Supplem Mat B_ whole rock compilation.xlsx
- Supplem Mat C - px_trace_pn_ Revision.xlsx
- Supplem Mat D - ol_trace_pn_Revision.xlsx
- Supplem Mat E - figure _revision.pdf
- Supplem Mat F - P-T calculated.xls
- Supplem Mat G - pl_ap_comp.xlsx
