# Supplementary material
Source: MDPI journal article supplement (https://www.mdpi.com/2075-163X/12/6/775)
Supplement: s1 [file s1 › Supplem Mat A_epma_cpx_ol_revised.xlsx]

## Sheet: labels
Supplementary material SA - Tables of major element of clinopyroxene and olivine compositions from the Ponte Nova massif.
Table SA1. Analytical parameters and calibration standards used for WDS analyses of clinopyroxene and olivine.
Table SA2. Major element compositions in mass % of clinopyroxene from the Ponte Nova massif. Structural formula calculated on the basis of 6 oxygens. Abbrev.: c, cores; m/r, mantling/rims
Table SA3. Major element concentrations in mass % of olivine from the Ponte Nova massif. Structural formula calculated on the basis of 4 oxygens. Abbrev.: c, cores; r, rims.

## Sheet: Anal. Paramet.
Table SA1. Analytical parameters and calibration standards used for WDS analyses of clinopyroxene and olivine.
CLINOPYROXENE routine
Element	Crystal	Spectral Line	Time Counting on Peak (s)	Time Counting on Background (s)	Standand
					Element	Material	Mass (%)
Si	TAP	Ka	10	5	SiO2	diopside	55.81
Al	TAP	Ka	15	7.5	Al2O3	anorthite	36.0337
Fe	LIF	Ka	10	5	FeO	fayalite	67.5403
Mn	LIF	Ka	60	30	MnO	fayalite	2.1434
Ca	PET	Ka	15	7.5	CaO	wollastonite	56.1
K	PET	Ka	20	10	K2O	Ortoclase	12.7808
Ti	LIF	Ka	60	30	TiO2	Rutile	99.9834
Cr	LIF	Ka	60	30	Cr2O3	chromite	60.4931
Na	TAP	Ka	10	5	Na2O	Albite	11.7948
Mg	TAP	Ka	20	10	MgO	diopside	18.3061
OLIVINE routine
Element	Crystal	Spectral Line	Time Counting on Peak (s)	Time Counting on Background (s)	Standand
					Element	Material	Mass (%)
Si	TAP	Ka	10	5	SiO2	SC_olivine	40.81
Al	TAP	Ka	20	10	Al2O3	anorthite	36.0337
Fe	LIF	Ka	10	5	FeO	fayalite	67.5403
Mn	LIF	Ka	40	20	MnO	fayalite	2.1434
Ni	LIF	Ka	50	25	NiO	SC_olivine	0.73
Ca	PET	Ka	20	10	CaO	Wollastonite	47.8387
K	PET	Ka	10	5	K2O	Ortoclase	12.7808
Ti	LIF	Ka	10	5	TiO2	Rutile	99.9834
Mg	TAP	Ka	5	2.5	MgO	SC_olivine	49.42
Na	TAP	Ka	20	10	Na2O	Albite	11.7948

## Sheet: cpx_ms
Table SA2. Major element compositions in mass % of clinopyroxene from the Ponte Nova massif. Structural formula calculated on the basis of 6 oxygens. Abbrev.: c, cores; m/r, mantling/rims
Intrusion	CI	CI	CI	CI	CI	CI	CI	CI	CI	CI	CI	CI	CI	CI	CI	CI	CI	CI	CI	CI	CI	CI	CI	CI	CI	CI	CI	CI	CI	CI	CI	CI	CI	CI	CI	CI	CI	CI	CI	CI	CI	CI	CI	CI	CI	CI	CI	CI	CI
SAMPLE	r117	r117	r117	r117	r117	r117	r117	r117	r117	r117	r163	r163	r163	r163	r163	r163	r163	r163	r163	r01a	r01a	r01a	r01a	r01a	r01a	r01a	r01a	r01a	r01a	r01f	r01f	r01f	r01f	r01f	r01f	r01f	r116	r116	r116	r116	r116	r116	r117a	r117a	r117a	r117a	r117a	r117a	r117a
ANALYSIS	Cpx1_1	Cpx1_2	Cpx1_3	Cpx2_1	Cpx2_2	Cpx2_3	Cpx2_4	Cpx3_1	Cpx3_2	Cpx3_2	Cpx1_1	Cpx1_2	Cpx1_3	Cpx2_1	Cpx2_2	Cpx2_3	Cpx4_1	Cpx4_2	Cpx4_2	1	1	2	2	3	3	4	4	5	5	1	1	2	2	2	3	3	1	1	1	2	2	2	1	1	1	2	2	3	3
LOCATION	c	m/r	m/r	c	m/r	m/r	m/r	c	m/r	m/r	c	m/r	m/r	c	c	m/r	c	m/r	c	m/r	c	m/r	c	m/r	c	m/r	c	m/r	m/r	m/r	c	m/r	m/r	c	m/r	c	m/r	m/r	c	m/r	m/r	c	m/r	m/r	c	m/r	c	m/r	c
SiO2	51.215	50.873	48.236	51.304	51.511	48.499	45.446	52.033	51.106	47.684	49.854	52.013	47.117	51.121	50.696	48.975	51.113	48.698	51.563	46.405	48.304	47.461	46.45	47.221	47.835	46.428	48.919	47.082	45.495	47.208	47.395	48.434	47.938	51.143	48.05	46.416	48.505	47.996	49.738	47.846	44.076	50.432	48.967	51.913	51.995	47.496	49.958	49.797	47.124
TiO2	0.743	1.144	2.731	0.655	0.808	1.996	3.772	0.761	1.738	2.756	0.819	2.098	3.325	0.631	0.965	3.161	1.259	2.704	0.795	3.094	2.316	2.63	2.68	2.331	2.412	3.136	2.06	2.564	3.272	3.033	2.457	2.537	2.781	1.228	2.57	2.92	2.134	2.239	1.407	2.602	3.192	0.883	2.06	0.657	0.626	2.724	1.646	1.826	2.475
Al2O3	2.629	4.685	6.043	2.649	2.601	6.057	7.157	2.034	3.697	6.307	2.646	2.518	6.052	2.171	3.39	4.541	3.722	4.605	2.879	6.918	5.594	5.822	6.759	6.234	5.65	6.909	4.752	6.165	7.293	6.412	5.816	5.83	6.013	3.816	5.677	6.19	4.913	5.041	4.276	4.961	7.1	3.532	4.676	2.5	2.378	6.047	4.111	4.44	5.813
Cr2O3	1.049	0.287	0.49	1.238	1.278	0.361	0	0.803	0.492	0.099	0.553	0.116	0.05	0.943	0.789	0	0.501	0.019	1.19	0.027	0.23	0.005	0	0.299	0.254	0.142	0.231	0.289	0.243	0.053	0.013	0.042	0.039	0.329	0.027	0.023	0.046	0.015	0.298	0	0.164	0.657	0.046	1.142	1.115	0.306	0.262	0.065	0.275
FeO	4.378	5.786	5.515	4.05	3.954	6.604	6.798	4.142	5.385	6.148	3.924	6.678	8.103	3.654	4.607	7.072	4.665	8.067	3.811	7.322	6.537	6.957	7.351	7.014	6.865	6.854	6.547	6.772	7.66	6.757	7.142	6.843	7.268	5.646	6.759	7.061	7.426	7.244	5.636	7.197	6.944	4.323	6.612	3.721	3.917	6.459	6.462	6.555	6.383
MnO	0.083	0.12	0.086	0.051	0.056	0.128	0.111	0.1	0.132	0.093	0.109	0.138	0.104	0.045	0.105	0.167	0.118	0.164	0.057	0.089	0.117	0.113	0.097	0.059	0.09	0.115	0.11	0.112	0.073	0.127	0.09	0.105	0.124	0.132	0.11	0.129	0.127	0.175	0.115	0.148	0.103	0.08	0.097	0.07	0.077	0.108	0.121	0.154	0.077
MgO	17.076	14.455	13.574	17.407	17.552	13.901	13.205	17.525	15.547	13.595	16.914	14.084	13.326	17.264	16.532	14.014	16.158	13.434	17.157	12.815	13.989	12.903	13.095	13.285	13.432	12.591	13.739	12.923	12.709	12.617	13.44	13.452	13.412	15.59	13.437	13.149	13.32	13.656	14.904	13.655	12.364	16.2	13.834	16.996	17.216	13.498	14.861	13.898	13.54
CaO	22.538	22.851	22.448	22.451	22.892	22.234	22.005	22.962	22.51	22.287	21.911	21.702	21.21	23.702	23.166	21.392	22.804	21.287	22.743	22.812	22.919	22.567	22.575	22.786	23.153	22.463	22.897	22.365	22.782	22.337	22.877	22.428	22.78	22.012	22.405	22.759	22.169	22.29	22.258	21.935	22.392	22.062	22.698	22.564	22.594	22.675	22.521	22.968	23.092
Na2O	0.497	0.651	0.812	0.419	0.401	0.412	0.511	0.264	0.467	0.707	0.352	0.919	0.527	0.274	0.39	0.541	0.397	0.568	0.322	0.47	0.318	0.623	0.452	0.42	0.351	0.524	0.52	0.649	0.527	0.771	0.406	0.696	0.463	0.44	0.722	0.562	0.655	0.58	0.506	0.629	0.618	0.406	0.817	0.388	0.428	0.539	0.47	0.857	0.695
TOTAL	100.208	100.852	99.935	100.224	101.053	100.192	99.005	100.624	101.074	99.676	97.082	100.266	99.814	99.805	100.64	99.863	100.737	99.546	100.517	99.952	100.324	99.081	99.459	99.649	100.042	99.162	99.775	98.921	100.054	99.315	99.636	100.367	100.818	100.336	99.757	99.209	99.295	99.236	99.138	98.973	96.953	98.575	99.807	99.951	100.346	99.852	100.412	100.56	99.474
Mg#	0.87	0.82	0.81	0.88	0.89	0.79	0.78	0.88	0.84	0.8	0.88	0.79	0.75	0.89	0.86	0.78	0.86	0.75	0.89	0.76	0.79	0.77	0.76	0.77	0.78	0.77	0.79	0.77	0.75	0.77	0.77	0.78	0.77	0.83	0.78	0.77	0.76	0.77	0.83	0.77	0.76	0.87	0.79	0.89	0.89	0.79	0.8	0.79	0.79
TSi	1.862	1.855	1.781	1.863	1.856	1.79	1.703	1.885	1.859	1.766	1.868	1.92	1.757	1.865	1.84	1.82	1.856	1.821	1.87	1.726	1.782	1.777	1.733	1.757	1.774	1.74	1.815	1.764	1.692	1.763	1.764	1.786	1.765	1.871	1.782	1.735	1.811	1.791	1.843	1.791	1.687	1.867	1.81	1.893	1.887	1.761	1.834	1.827	1.75
TAl	0.113	0.145	0.219	0.113	0.11	0.21	0.297	0.087	0.141	0.234	0.117	0.08	0.243	0.093	0.145	0.18	0.144	0.179	0.123	0.274	0.218	0.223	0.267	0.243	0.226	0.26	0.185	0.236	0.308	0.237	0.236	0.214	0.235	0.129	0.218	0.265	0.189	0.209	0.157	0.209	0.313	0.133	0.19	0.107	0.102	0.239	0.166	0.173	0.25
TFe3+	0.025	0	0	0.023	0	0	0	0.028	0	0	0.016	0	0	0	0.015	0	0	0	0.007	0	0	0	0	0	0	0	0	0	0	0	0	0	0	0	0	0	0	0	0	0	0	0	0	0	0.011	0	0	0	0
M1Al	0	0.056	0.044	0	0	0.053	0.019	0	0.017	0.041	0	0.029	0.023	0	0	0.019	0.016	0.023	0	0.029	0.025	0.033	0.029	0.03	0.021	0.045	0.022	0.036	0.011	0.045	0.019	0.039	0.026	0.035	0.03	0.007	0.027	0.012	0.03	0.009	0.007	0.021	0.014	0	0	0.025	0.012	0.018	0.004
M1Ti	0.02	0.031	0.076	0.018	0.022	0.055	0.106	0.021	0.048	0.077	0.023	0.058	0.093	0.017	0.026	0.088	0.034	0.076	0.022	0.087	0.064	0.074	0.075	0.065	0.067	0.088	0.057	0.072	0.092	0.085	0.069	0.07	0.077	0.034	0.072	0.082	0.06	0.063	0.039	0.073	0.092	0.025	0.057	0.018	0.017	0.076	0.045	0.05	0.069
M1Fe3+	0.101	0.064	0.067	0.095	0	0.065	0.102	0.069	0.047	0.086	0.095	0	0.069	0	0.112	0.022	0.072	0.044	0.075	0.105	0.079	0.086	0.119	0.103	0.087	0.071	0.078	0.095	0.144	0.074	0.108	0.083	0.086	0.048	0.096	0.133	0.087	0.112	0.075	0.099	0.161	0.072	0.118	0.065	0.076	0.091	0.088	0.113	0.149
M1Fe2+	0	0.055	0.052	0	0	0.052	0.035	0	0.031	0.042	0	0.134	0.072	0.017	0	0.094	0	0.107	0	0.069	0.055	0.086	0.048	0.056	0.074	0.088	0.076	0.067	0.042	0.091	0.058	0.068	0.074	0.023	0.059	0.044	0.083	0.053	0.023	0.057	0.029	0	0.047	0	0	0.053	0.033	0.057	0.02
M1Cr	0.03	0.008	0.014	0.036	0.036	0.011	0	0.023	0.014	0.003	0.016	0.003	0.001	0.027	0.023	0	0.014	0.001	0.034	0.001	0.007	0	0	0.009	0.007	0.004	0.007	0.009	0.007	0.002	0	0.001	0.001	0.01	0.001	0.001	0.001	0	0.009	0	0.005	0.019	0.001	0.033	0.032	0.009	0.008	0.002	0.008
M1Mg	0.848	0.786	0.747	0.852	0.942	0.765	0.738	0.887	0.843	0.751	0.866	0.775	0.741	0.939	0.84	0.777	0.863	0.749	0.87	0.71	0.769	0.72	0.728	0.737	0.743	0.704	0.76	0.722	0.704	0.703	0.746	0.739	0.736	0.85	0.743	0.733	0.741	0.76	0.823	0.762	0.706	0.863	0.762	0.884	0.875	0.746	0.813	0.76	0.749
M2Mg	0.078	0	0	0.09	0.001	0	0	0.059	0	0	0.079	0	0	0	0.055	0	0.011	0	0.058	0	0	0	0	0	0	0	0	0	0	0	0	0	0	0	0	0	0	0	0	0	0	0.031	0	0.04	0.057	0	0	0	0
M2Fe2+	0.007	0.058	0.051	0.005	0.119	0.087	0.076	0.028	0.086	0.062	0.012	0.072	0.111	0.095	0.013	0.104	0.07	0.101	0.034	0.054	0.068	0.046	0.062	0.059	0.052	0.056	0.049	0.051	0.052	0.046	0.056	0.061	0.064	0.101	0.054	0.044	0.062	0.061	0.076	0.07	0.032	0.062	0.039	0.049	0.032	0.057	0.077	0.032	0.029
M2Mn	0.003	0.004	0.003	0.002	0.002	0.004	0.004	0.003	0.004	0.003	0.003	0.004	0.003	0.001	0.003	0.005	0.004	0.005	0.002	0.003	0.004	0.004	0.003	0.002	0.003	0.004	0.003	0.004	0.002	0.004	0.003	0.003	0.004	0.004	0.003	0.004	0.004	0.006	0.004	0.005	0.003	0.003	0.003	0.002	0.002	0.003	0.004	0.005	0.002
M2Ca	0.878	0.893	0.888	0.874	0.884	0.879	0.883	0.891	0.877	0.884	0.879	0.858	0.847	0.926	0.901	0.852	0.887	0.853	0.884	0.909	0.906	0.905	0.902	0.908	0.92	0.902	0.91	0.898	0.908	0.894	0.912	0.886	0.899	0.863	0.89	0.911	0.887	0.891	0.884	0.88	0.918	0.875	0.899	0.882	0.879	0.901	0.886	0.903	0.919
M2Na	0.035	0.046	0.058	0.03	0.028	0.029	0.037	0.019	0.033	0.051	0.026	0.066	0.038	0.019	0.027	0.039	0.028	0.041	0.023	0.034	0.023	0.045	0.033	0.03	0.025	0.038	0.037	0.047	0.038	0.056	0.029	0.05	0.033	0.031	0.052	0.041	0.047	0.042	0.036	0.046	0.046	0.029	0.059	0.027	0.03	0.039	0.033	0.061	0.05
M2K	0	0	0	0	0	0	0	0	0	0	0	0	0	0	0	0	0	0	0	0	0	0	0	0	0	0	0	0.001	0	0	0	0	0	0	0	0	0	0	0	0	0	0	0	0	0	0	0	0	0
SUM_CAT	4	4	4	4	4	4	4	4	4	4	4	4	4	4	4	4	4	4	4	4	4	4	4	4	4	4	4	3.999	4	4	4	4	4	4	4	4	4	4	4	4	4	4	4	4	4	4	4	4	4
JD1	0	2.505	2.43	0	0	1.627	1.064	0	0.922	2.3	0	1.528	1.263	0	0	1.025	0.842	1.264	0	1.62	1.249	1.856	1.661	1.681	1.171	2.13	1.207	2.006	0.624	2.54	1.036	2.156	1.442	1.694	1.648	0.422	1.489	0.685	1.631	0.513	0.432	1.142	0.762	0.024	0	1.404	0.65	1.012	0.224
AE1	1.899	0	0.806	1.594	1.419	0	1.034	0.984	0.839	0.536	1.373	1.925	0.842	0.971	1.495	1.065	0.662	0.961	1.212	0.288	0	0.677	0.183	0.024	0.221	0	0.834	0.696	1.555	0.597	0.591	0.611	0.389	0	1.238	1.875	1.116	1.643	0.342	2.027	2.218	0.43	2.491	1.434	1.616	0.778	1.166	2.352	2.607
CFTS1	5.23	3.916	3.705	5.434	0.423	4.147	4.714	3.892	2.433	4.443	4.604	0	3.071	0.39	5.809	0.123	3.992	1.441	4.613	5.64	4.711	4.124	6.553	6.24	4.972	4.192	3.814	5.088	7.137	3.651	5.436	4.034	4.422	3.071	4.122	5.639	3.758	4.582	4.207	3.428	7.383	4.464	4.132	3.743	4.167	4.794	4.032	3.98	6.291
CTTS1	1.101	1.708	4.221	0.967	1.11	3.057	6.008	1.1	2.543	4.289	1.239	3.057	5.154	0.867	1.435	4.738	1.849	4.108	1.161	4.872	3.53	4.109	4.241	3.643	3.709	4.945	3.138	4.047	5.248	4.763	3.818	3.901	4.265	1.808	3.985	4.63	3.293	3.478	2.128	4.038	5.31	1.322	3.171	0.958	0.913	4.232	2.466	2.781	3.912
CATS1	0	0.539	0	0	0	1.295	0	0	0	0	0	0	0	0	0	0	0	0	0	0	0.144	0	0	0	0	0.396	0	0	0	0	0	0	0	0.193	0	0	0	0	0	0	0	0	0	0	0	0	0	0	0
WO1	41.249	42.427	41.495	40.808	43.243	40.003	39.203	42.303	41.937	40.676	41.387	41.992	38.602	45.153	41.818	40.815	41.875	40.519	41.54	40.653	41.374	41.988	40.093	40.845	42.035	40.923	42.725	41.152	39.662	41.548	41.388	41.185	41.074	41.079	41.378	41.137	41.672	41.26	41.616	41.026	40.365	41.252	42.468	42.145	41.854	41.15	41.571	43.059	41.781
EN1	50.159	42.767	41.581	50.929	47.768	42.193	41.686	50.225	45.082	41.935	50.728	40.678	40.936	47.034	48.715	41.635	47.042	40.452	49.663	39.992	42.258	39.953	41.071	41.152	40.938	39.352	41.474	40.43	40.398	39.266	41.396	40.993	40.764	45.479	41.293	41.324	40.732	42.042	44.675	42.003	40.763	48.058	42.208	49.096	49.76	41.559	44.134	41.946	42.411
FS1	0.362	6.137	5.762	0.268	6.037	7.678	6.29	1.496	6.244	5.821	0.669	10.82	10.132	5.585	0.728	10.598	3.738	11.255	1.811	6.936	6.735	7.292	6.197	6.415	6.955	8.06	6.808	6.579	5.377	7.636	6.335	7.121	7.644	6.677	6.336	4.973	7.94	6.31	5.401	6.964	3.528	3.332	4.768	2.6	1.689	6.083	5.981	4.87	2.774
[truncated: 317 more columns]

## Sheet: ol_ms
Table SA3. Major element concentrations in mass % of olivine from the Ponte Nova massif. Structural formula calculated on the basis of 4 oxygens. Abbrev.: c, cores; r, rims.
Intrusion	CI	CI	CI	CI	CI	CI	CI	CI	CI	CI	CI	CI	CI	CI	CI	CI	CI	CI	CI	CI	CI	CI	CI	CI	CI	CI	CI	CI	CI	CI	CI	CI	CI	CI	CI	CI	CI	CI	CI	CI	CI	CI	CI	CI	CI	CI	CI	CI	CI
Sample	r01a	r01a	r01a	r01a	r01a	r116	r116	r116	r116	r116	r116	r117	r117	r117	r117a	r117a	r117a	r117a	r117a	r117a	r120	r120	r120	r120	r120	r120	r141	r141	r141	r141	r141	r141	r163	r163	r163	r163	r163	r163	r163	r171a	r171a	r171a	r171a	r171a	r171a	r83	r83	r83	r83
Analysis	1	1	2	3	3	1	1	2	2	3	3	Ol2	Ol2	Ol2	1	1	2	2	3	3	1	1	2	2	3	3	1	1	2	2	3	3	7	7	8	8	Ol2	Ol2	Ol2	1	1	2	2	3	3	1	1	2	2
Location	r	c	c	r	c	r	c	r	c	r	c	r	r	c	r	c	r	c	r	c	r	c	r	c	r	c	r	c	r	c	r	c	r	c	r	c	r	c	c	r	c	r	c	r	c	r	c	r	c
SiO2	37.387	38.005	37.921	37.428	37.126	37.48	37.689	37.212	37.655	37.706	37.595	38.09	37.9	37.71	37.978	37.325	37.855	37.734	37.854	36.165	36.172	37.659	35.401	35.299	35.622	35.647	37.757	38.009	37.673	37.534	36.401	37.467	36.519	36.517	35.874	37.918	37.25	39.28	38.89	36.205	35.978	36.07	37.338	36.93	36.871	36.366	36.314	36.658	36.312
FeO	26.101	26.273	25.969	26.428	26.388	26.118	26.167	26.399	25.543	24.84	25.089	22.27	23.65	22.59	23.439	23.906	22.884	22.742	23.695	23.788	33.932	25.598	35.141	35.057	34.237	33.204	24.888	24.069	23.174	23.149	25.532	25.515	28.293	28.183	26.272	17.629	29.23	17.76	18.22	32.208	31.777	31.97	28.18	32.295	31.108	28.591	29.218	28.885	29.201
MgO	36.25	36.503	36.226	36.062	35.795	36.617	36.039	36.184	36.147	36.66	36.96	37.45	36.86	37.7	38.981	38.273	38.756	38.384	38.347	38.094	28.964	36.457	27.38	27.745	28.907	29.483	36.393	37.444	38.545	37.532	36.376	36.169	33.706	33.401	34.859	42.504	32.64	42	42.69	30.107	30.959	30.717	34.288	31.012	31.35	32.209	32.276	32.238	31.775
MnO	0.421	0.438	0.434	0.45	0.487	0.46	0.511	0.488	0.465	0.421	0.438	0.35	0.41	0.41	0.429	0.41	0.38	0.431	0.423	0.341	0.765	0.405	0.98	0.813	0.858	0.726	0.412	0.422	0.405	0.4	0.441	0.489	0.466	0.492	0.42	0.28	0.46	0.26	0.25	0.578	0.547	0.48	0.436	0.559	0.458	0.912	0.982	0.86	0.877
CaO	0.163	0.19	0.194	0.221	0.289	0.121	0.217	0.178	0.206	0.165	0.225	0.14	0.16	0.2	0.113	0.199	0.086	0.166	0.217	0.2	0.284	0.319	0.228	0.334	0.299	0.312	0.058	0.083	0.09	0.128	0.014	0.08	0.236	0.345	0.22	0.257	0.31	0.4	0.38	0.154	0.233	0.164	0.307	0.177	0.228	0.212	0.146	0.19	0.209
NiO	0.084	0.09	0.1	0.104	0.095	0.085	0.102	0.059	0.065	0.094	0.125			0.16	0.155	0.121	0.185	0.091	0.121	0.113	0.025	0.084	0.055	0.014	0.045	0.043	0.078	0.124	0.064	0.087	0.081	0.123	0.106	0.144	0.104	0.201		0.18	0.19	0.086	0.059	0.123	0.164	0.137	0.062	0.026	0.043	0.057	0.049
Total	100.406	101.499	100.844	100.693	100.18	100.881	100.725	100.52	100.081	99.886	100.432	98.3	98.98	98.77	101.095	100.234	100.146	99.548	100.657	98.701	100.142	100.522	99.185	99.262	99.968	99.415	99.586	100.151	99.951	98.83	98.845	99.843	99.326	99.082	97.749	98.789	99.89	99.88	100.62	99.338	99.553	99.524	100.713	101.11	100.077	98.316	98.979	98.888	98.423
Si	0.987	0.993	0.996	0.988	0.986	0.985	0.993	0.985	0.995	0.995	0.988	1.003	1	0.998	0.984	0.98	0.988	0.99	0.986	0.967	0.998	0.991	0.994	0.991	0.988	0.989	1	0.996	0.987	0.994	0.978	0.993	0.988	0.992	0.98	0.981	1.001	1.002	0.988	0.998	0.989	0.992	0.994	0.998	1.001	0.998	0.993	1	0.998
Fe2+	0.576	0.574	0.57	0.583	0.586	0.574	0.577	0.584	0.565	0.548	0.552	0.491	0.522	0.5	0.508	0.525	0.499	0.499	0.516	0.532	0.783	0.564	0.825	0.823	0.794	0.771	0.551	0.527	0.508	0.513	0.574	0.565	0.64	0.64	0.6	0.381	0.657	0.379	0.387	0.742	0.73	0.735	0.627	0.73	0.706	0.656	0.668	0.659	0.671
Mg	1.427	1.422	1.418	1.419	1.417	1.434	1.416	1.427	1.424	1.443	1.448	1.471	1.45	1.487	1.506	1.497	1.507	1.502	1.49	1.518	1.192	1.431	1.146	1.161	1.195	1.22	1.436	1.462	1.505	1.482	1.457	1.429	1.359	1.352	1.419	1.639	1.307	1.597	1.617	1.237	1.268	1.259	1.361	1.249	1.269	1.318	1.316	1.311	1.302
Mn	0.009	0.01	0.01	0.01	0.011	0.01	0.011	0.011	0.01	0.009	0.01	0.008	0.009	0.009	0.009	0.009	0.008	0.01	0.009	0.008	0.018	0.009	0.023	0.019	0.02	0.017	0.009	0.009	0.009	0.009	0.01	0.011	0.011	0.011	0.01	0.006	0.01	0.006	0.005	0.013	0.013	0.011	0.01	0.013	0.011	0.021	0.023	0.02	0.02
Ca	0.005	0.005	0.005	0.006	0.008	0.003	0.006	0.005	0.006	0.005	0.006	0.004	0.005	0.006	0.003	0.006	0.002	0.005	0.006	0.006	0.008	0.009	0.007	0.01	0.009	0.009	0.002	0.002	0.003	0.004		0.002	0.007	0.01	0.006	0.007	0.009	0.011	0.01	0.005	0.007	0.005	0.009	0.005	0.007	0.006	0.004	0.006	0.006
Ni	0.002	0.002	0.002	0.002	0.002	0.002	0.002	0.001	0.001	0.002	0.003			0.003	0.003	0.003	0.004	0.002	0.003	0.002	0.001	0.002	0.001		0.001	0.001	0.002	0.003	0.001	0.002	0.002	0.003	0.002	0.003	0.002	0.004		0.004	0.004	0.002	0.001	0.003	0.004	0.003	0.001	0.001	0.001	0.001	0.001
CATIONS	3.006	3.006	3.001	3.008	3.01	3.008	3.005	3.013	3.001	3.002	3.007	2.977	2.986	3.003	3.013	3.02	3.008	3.008	3.01	3.033	3	3.006	2.996	3.004	3.007	3.007	3	2.999	3.013	3.004	3.021	3.003	3.007	3.008	3.017	3.018	2.984	2.999	3.011	2.997	3.008	3.005	3.005	2.998	2.995	3	3.005	2.997	2.998
Forsterite (mol.%)	0.71	0.71	0.71	0.71	0.71	0.71	0.71	0.71	0.72	0.72	0.72	0.75	0.74	0.75	0.75	0.74	0.75	0.75	0.74	0.74	0.6	0.72	0.58	0.59	0.6	0.61	0.72	0.74	0.75	0.74	0.72	0.72	0.68	0.68	0.7	0.81	0.67	0.81	0.81	0.63	0.63	0.63	0.68	0.63	0.64	0.67	0.66	0.67	0.66
[truncated: 176 more columns]
