# Supplementary material
Source: MDPI journal article supplement (https://www.mdpi.com/2075-163X/12/6/775)
Supplement: s1 [file s1 › Supplem Mat B_ whole rock compilation.xlsx]

## Sheet: Supplem Mat. PN - wr geoch
Supplementary Material SB
Compilation of whole-rock geochemical analyses from the Ponte Nova alkaline mafic-ultramafic massif. All data is compiled from Azzone et al. (2016; 2020)*. Samples in blue are those selected for trace element (LA-ICP-MS) mineral analyses, that presented important amounts of clinopyroxene and olivine antecrysts. For details of analytical methods and sample descriptions, please see the original sou…
	Central Intrusion									Western Intrusion			Western Intrusion		Northern Intrusion			Central Plug			Eastern Intrusion		Breccia matrix	Southern Sattelite Intrusion
sample	117 a	01 f	01 a	121a	133	141	171	83	120	57	58 b	65	106	126 a	41 a	97	100 b	113	112	115c	32	165 a	29a	180	178 a	24 b	26	19 a	18 c
facies	CI - LS	CI - LS	CI - LS	CI - LS	CI - LS	CI - LS	CI - LS	CI - US	CI - US	WI-LS	WI-LS	WI-LS	WI-US	WI-US
classif.	ol_cpxt	ol_cpxt	ol_mlgb			krs_cpxt_ol									ol_cpxt
type				krs-rich	krs-rich	krs-rich																							nph-mz
(mass %)
SiO2	44.49	41.41	43.52	34.52	40.63	42.87	42.77	44.37	44.8	38.58	45.29	44.82	47.18	46.52	45.83	44.84	45.75	43.26	41.8	45.52	45.82	45.74	48.85	43.16	45.13	40.89	40.55	43.73	46.85
TiO2	2.273	4.171	2.777	7.737	4.511	3.192	3.806	3.826	4.257	4.814	2.548	3.79	3.717	3.694	2.409	3.092	2.828	4.275	4.58	3.691	3.522	3.594	3.046	4.407	4.28	5.353	5.472	4.667	3.164
Al2O3	5.55	5.9	9.75	8.26	9.79	6.57	11.15	13.18	17.68	3.89	6.24	8.66	14.29	15.14	9.35	9.8	11.12	14.43	14.79	16.15	13.2	12.89	15.45	13.02	14.56	11.77	11.35	12.17	15.13
Fe2O3T	11.55	15.99	12.47	21.07	17.47	13.93	14.24	14.5	11.33	15.93	11.62	13.49	12.75	12.48	11.18	12.79	11.65	14.57	15.81	12.09	12.16	12.48	10.46	13.64	12.61	15.62	15.7	14.08	10.05
MnO	0.162	0.163	0.151	0.242	0.19	0.163	0.165	0.202	0.148	0.196	0.153	0.183	0.177	0.181	0.158	0.18	0.158	0.204	0.208	0.21	0.176	0.179	0.19	0.18	0.168	0.193	0.187	0.181	0.144
MgO	16.82	14.14	13.28	8.88	10.35	14.9	10.7	6.71	4.48	17.6	17.2	10.76	5.71	4.42	13.08	10.83	9.92	5.93	5.7	3.95	6.72	7.31	4.4	6.82	4.08	6.48	6.66	6.27	3.43
CaO	16.36	17.23	16.13	15.05	13.11	15.19	13.8	10.24	10.4	15.07	12.71	13.58	8.83	7.58	14.05	14.08	13.7	9.82	9.81	9.22	9.46	9.63	7.7	10.22	8.55	11.25	11.46	10.5	7.14
Na2O	0.69	0.43	1.06	1.18	1.62	1	1.59	2.86	3.41	0.36	1.12	1.58	3.2	3.65	1.86	1.8	2.26	3.85	3.46	4.25	3.15	3.25	3.96	3.05	2.92	2.15	2.4	2.55	3.82
K2O	0.44	0.19	0.32	0.76	1.04	0.67	0.9	2.18	1.53	0.29	1.12	1.62	2.93	3.72	1.16	1.25	1.42	2.77	2.44	3.19	2.75	2.7	3.5	2.86	4.39	3.09	3.19	3.16	4.2
P2O5	0.091	0.079	0.103	1.223	0.403	0.191	0.249	0.66	0.772	1.2	0.436	0.533	0.991	1.191	0.383	0.594	0.488	0.867	0.914	1.084	0.776	0.781	0.987	0.942	1.699	1.746	1.769	1.375	1.142
LOI(1)	0.58	0.39	0.34	0.34	0.28	0.51	0.02	0.46	0.53	1.33	1.27	0.22	0.32	0.5	0.08	0.1	0.28	0.5	0.15	0.58	1.76	0.3	0.16	0.56	0.52	0.42	0.6	0.38	4.07
Total	99.006	100.093	99.901	99.262	99.394	99.186	99.39	99.188	99.337	99.26	99.707	99.236	100.095	99.076	99.54	99.356	99.574	100.476	99.662	99.935	99.494	98.854	98.703	98.859	98.907	98.962	99.338	99.063	99.14
Mg#	74.2631	63.6649	67.8468	45.5061	53.9991	67.9423	59.8205	47.8327	43.9294	68.6434	74.5734	61.2466	47.0159	41.2368	69.8626	62.6554	62.7861	44.6423	41.6691	39.2967	52.267	53.7161	45.4588	49.7664	39.0648	45.115	45.6675	46.8747	40.3427
ne*	3.24088	2.00084	4.13308	5.55604	5.41035	4.4992	3.99846	4.31537	3.3245	1.70606	0.270706	2.1484	1.54912	4.56984	4.45935	3.42601	4.88178	12.2864	10.3344	10.6771	4.53045	5.78335	3.54819	8.6176	4.27847	5.93726	8.62733	4.57384	5.58578
ol	16.9989	14.9619	13.4276	10.3658	12.4161	15.8057	11.5834	7.45071	4.39188	23.4082	21.8316	9.14283	6.28576	4.87897	13.1531	9.9924	8.20276	4.9279	6.44742	1.99125	6.60978	7.15953	4.06738	5.87935	3.32564	5.8026	4.92021	4.94552	2.38739
(ppm)
V	292.1	544.6	373.9	633	519.4	351.3	492.5	357.3	257.4	402.4	251	410.4	291.5	226.3	246.7	291.6	276.7	348.3	365.8	225.1	261.9	271.5	183.4	361.2	240.3	423.9	477	350.5	187.3
Cr	1162	794.4	755.3	71.3	313.8	847.4	289.4	105.5	26.8	1087.3	1193.1	221.6	69.1	50.3	743	456.5	484.7	53.9	57.6	16.2	246.3	271.2	89.8	164.2	13.9	44.8	67.8	103.3	5.7
Co	66.8	74.9	64	64.6	62.5	68	58.6	40.4	29.8	78.9	67.1	51.6	32.8	28.8	53.1	49.4	46.9	42	52.5	20.2	32.8	36.2	17.3	37.2	27.8	43	40.8	36.1	21.7
Ni	367	342.6	274.5	41.9	131.4	307.4	222.2	76.5	40	385.3	410.3	119.5	48.3	38.3	261.2	185	162	70.3	76.2	8.2	114	126.3	46.3	109.2	25.9	53.5	66.6	58.7	18.5
Cu	24.1	279	173.3	34.7	31.1	83.4	30.5	50.1	49.9	28.6	43.1	35.1	22.5	35.4	39.9	80.4	47.8	76	83.4	12.8	48.9	50.2	21.4	65.8	47.3	60.9	39.6	37.9	29.5
Sc	49.6	57.1	48.6	40.3	38	48.1	38.7	23.2	18.4	48.4	38	43.6	22.7	17.3	36	36.6	34	23.5	19.4	13.5	21.4	23.1	14.4	25.4	17.4	32.3	28.5	31.1	13.1
Zn	73.9	98	79.1	153	125.4	88.6	99.6	114.7	90.8	96.5	81.1	100.6	106.5	113.9	82.4	98.4	88.4	121	126.8	127.7	117.6	113.1	116.5	103.6	116.3	128.6	130.8	118.8	105.7
Ga	13.3	15.8	17.1	21.3	23.2	15.6	20.8	22.4	25.4	12.1	11.6	17.1	22.9	23.2	17.7	18.3	19.1	24.5	25.5	25.2	22.7	23.5	22.5	22.7	20.1	18.6	20.8	21.4	21.9
Rb	11.2	3.2867	5.52465	15.4257	26.8942	15.3136	19.1561	46.1942	28.3389	8.27718	29.8056	39.7602	69.6636	102.469	24.5495	31.4349	31.7104	73.5027	42.3799	74.3886	64.2926	68.5438	103.46	65.2	144.239	96.7427	95.2978	91.5731	121.279
Sr	195	157.421	637.952	493.133	590.657	334.895	733.018	845.217	1602.56	288.105	411.833	559.351	1097.33	1272.11	569.173	798.277	732.359	1037.35	1229.04	1409.41	957.595	947.213	1316.12	1144.7	1909.98	1542.96	1230.27	1192.42	1296.06
Y	17.7	14.9501	12.5221	28.2794	21.6286	17.6012	18.7559	28.3552	22.4616	17.4702	15.4077	26.2069	27.322	33.5065	19.7186	23.0915	20.0248	31.4691	29.0421	35.6604	31.9925	31.5749	38.5264	31.5	32.9379	30.8061	29.9757	30.6973	29.5136
Zr	124	100.301	83.8472	214.865	166.138	129.662	167.526	274.827	199.407	108.754	141.725	228.585	280.11	341.77	176.785	192.425	178.867	316.637	291.406	355.25	344.846	329.877	424.842	323	310.734	260.397	260.758	323.184	363.665
Nb	8.96	6.61339	7.52355	29.8902	24.2587	16.8242	18.4073	38.6028	53.6491	14.2445	33.1991	34.7961	51.666	67.3066	27.0871	32.8203	30.2242	73.1315	69.3054	91.5249	79.4939	61.0085	79.284	74.6	84.8115	47.9793	47.4053	65.5496	78.4388
Cs	0.18	0.0766339	0.102795	0.246543	0.411071	0.217305	0.29176	0.618823	0.5617	0.183824	0.69301	0.504932	0.646997	0.783633	0.34932	0.399336	0.46105	1.04972	0.700872	0.991315	1.22799	0.773234	1.05997	0.93	1.51096	0.827601	0.916567	0.642898	1.62798
Ba	121	71.0149	170.255	317.975	349.347	237.284	322.25	797.808	908.115	236.354	925.472	872.029	2089.15	2722.22	366.142	450.849	438.201	1054.85	1023.46	1232.43	977.207	963.596	1357.08	1840.7	7407.93	5937.98	4181.03	4055.17	3211.39
La	12.7	8.79684	10.7306	30.5199	25.8351	18.0372	19.8887	50.3677	48.698	18.9795	21.7099	33.0059	58.1278	76.3818	25.1011	30.7152	30.0159	65.0433	63.0812	79.4373	65.0349	64.0614	84.8027	71.8	84.4563	69.0924	79.9809	71.5006	85.7995
Ce	30.4	22.8124	24.5353	88.3228	64.8524	47.3197	52.7381	104.27	98.1176	62.2409	63.2984	97.7494	125.743	165.795	64.6905	81.014	70.1764	132.771	128.361	161.138	134.367	132.053	175.029	158	202.56	164.609	187.666	166.762	185.556
Pr	4.55	3.83312	3.68016	12.4023	8.37003	6.31915	7.00664	12.7847	11.9298	9.4588	8.53362	13.4063	16.2079	20.7689	8.04957	10.2972	8.67671	16.4216	15.558	19.6667	16.6642	16.4282	21.4701	17.2	26.9079	22.3694	24.6172	21.9052	22.964
Nd	22.3	19.8826	18.0876	57.9925	36.6031	28.5471	31.2585	52.1013	48.9133	45.4047	36.6668	58.5449	66.1689	83.7251	34.3372	43.5215	36.2805	65.9802	62.6459	78.0331	66.7896	65.9041	84.1927	79.6	108.762	93.889	100.454	89.5579	88.3462
Sm	5.61	5.27711	4.54715	12.7586	8.10674	6.64193	7.01192	10.421	9.48453	9.54668	7.32163	12.1106	12.2855	15.2751	7.32451	9.19246	7.63821	12.7975	12.0517	14.6761	12.8721	12.7813	15.7552	15	18.6903	17.1134	17.7227	16.0416	15.0323
Eu	1.78	1.67974	1.66897	3.75902	2.47838	1.97322	2.21685	2.9141	3.31699	2.55971	1.98138	3.14058	3.77062	4.40409	2.19101	2.71728	2.4151	3.88972	3.70487	4.46437	3.4459	3.51605	4.22401	4.28	5.14547	4.68301	4.366	4.30161	4.13849
Gd	5.09	4.98564	4.34076	10.9312	7.39628	6.11006	6.34775	8.73855	7.90656	7.67631	5.99714	9.89422	9.83401	12.329	6.60456	7.59393	6.80009	10.901	10.0905	12.2808	10.6491	10.8	12.9262	11.1	13.9882	13.0746	12.4068	12.3722	11.599
Tb	0.78	0.690959	0.57017	1.43694	0.987939	0.834221	0.861688	1.1983	1.01918	0.956525	0.769422	1.32726	1.25409	1.56306	0.906855	1.04064	0.903651	1.44315	1.34084	1.61708	1.42705	1.43668	1.73404	1.46	1.68519	1.58384	1.52	1.52633	1.42579
Dy	3.86	3.5706	2.99899	6.99802	5.04635	4.19147	4.30998	6.01649	5.11045	4.49594	3.78774	6.44208	6.29856	7.75418	4.51324	5.21918	4.59271	7.31648	6.68121	8.07793	7.24795	7.15897	8.66805	7.18	8.18215	7.63948	7.48667	7.45963	7.03321
Ho	0.67	0.61943	0.508465	1.17958	0.873559	0.728199	0.770884	1.10113	0.893308	0.738925	0.662129	1.13775	1.10411	1.36441	0.820842	0.947712	0.8065	1.27937	1.17356	1.43963	1.31693	1.28762	1.58667	1.28	1.37201	1.29059	1.26104	1.27456	1.21765
Er	1.57	1.39749	1.17006	2.63477	2.0459	1.65992	1.78697	2.59472	2.11691	1.65114	1.57115	2.62496	2.66805	3.31696	1.87087	2.15631	1.88761	3.01182	2.77173	3.40535	3.11164	3.0457	3.76583	2.95	3.24996	3.00073	2.94655	3.02698	2.96613
Tm	0.16	0.153081	0.122504	0.293237	0.241704	0.194374	0.216287	0.325736	0.248934	0.17633	0.187041	0.320398	0.324176	0.408458	0.231312	0.263627	0.220154	0.367659	0.334887	0.419149	0.38978	0.380222	0.476776	0.36	0.373811	0.339923	0.330608	0.35764	0.362832
Yb	1.02	0.910534	0.765027	1.62814	1.3786	1.13034	1.24601	1.83631	1.45337	0.962517	1.06709	1.78332	1.91929	2.32418	1.27809	1.44126	1.28626	2.09802	1.90192	2.38694	2.17606	2.14399	2.68387	1.99	2.06386	1.86423	1.77748	1.989	2.08841
Lu	0.12	0.117403	0.0939684	0.217605	0.184884	0.147651	0.173878	0.260504	0.197176	0.126707	0.149593	0.255631	0.266269	0.324167	0.175711	0.200696	0.172217	0.283407	0.25829	0.325536	0.31281	0.301015	0.383347	0.27	0.281688	0.263582	0.251651	0.281663	0.292311
Hf	4.04	3.76743	3.08771	7.05908	5.10439	4.36358	4.88694	6.09714	5.0846	3.67401	3.91793	6.82994	6.98611	8.36704	4.47834	4.83062	4.58625	7.73602	6.92296	8.05107	8.10383	8.00489	9.7755	8.34	8.27686	7.89064	6.85778	9.02264	8.94333
Ta	0.69	b.d.l.	6.29043	2.78148	1.76186	1.03301	1.32974	2.91283	3.35461	1.72845	1.7441	2.55733	3.51983	5.05241	2.13237	2.86194	1.59232	4.53866	4.64497	5.46348	3.59672	4.06474	5.29001		8.42969	5.4218	4.68746	6.27027	6.3065
Pb	1.43	1.24992	0.942438	0.806316	2.59474	1.83057	1.62956	5.01841	3.17414	0.36419	2.35152	3.76029	5.52493	5.9034	1.9701	2.49068	2.47343	3.25303	2.90993	5.08683	6.73604	6.45028	8.87513	3.89	5.79318	4.31578	5.06833	4.97325	9.30554
Th	1.42	0.495207	0.724157	1.97956	2.72834	1.97986	2.05368	5.15069	2.97651	0.799286	2.76231	2.91995	4.54702	5.82129	3.21428	3.1842	3.86188	7.0554	6.42307	8.02722	7.37457	7.21343	9.64973	6.27	6.08834	3.43944	5.7466	4.9933	8.01289
U	0.35	0.114195	0.175622	0.440291	0.580244	0.418483	0.448534	1.04048	0.695084	0.147665	0.481624	0.552239	0.977301	1.26046	0.734083	0.712045	0.882559	1.68296	1.51713	1.92644	1.491	1.48018	1.9687	1.41	1.12081	0.661063	1.15163	0.950057	1.55556
F	455.3	744.2	482.9	1255.1	444.8	596.2	415.3	933	512.2	1055.5	704.9	961	1188.2	1227	b.d.l.	457.6	481.4	1037.5	585.1	1032.2	1846.9	1537.5	1422.8	1212.5	1458.3	1555.5	2053	1596	1579
S	413.5	1559.3	857.7	5672.7	1641.7	805.6	b.d.l.	699.5	b.d.l.	1753.4	1093.1	318.9	245.3	265.5	b.d.l.	137.6	b.d.l.	399.3	217.8	2595.4	782.1	1353.6	298.8	725.4	782.2	1100.1	1151.2	302.2	1608
Cl	b.d.l.	b.d.l.	b.d.l.	46.3	158.2	70.6	b.d.l.	107.8	b.d.l.	b.d.l.	b.d.l.	b.d.l.	105.7	b.d.l.	b.d.l.	b.d.l.	b.d.l.	83.6	273.9	741.3	b.d.l.	533.8	598.8	171.3	160.7	b.d.l.	b.d.l.	38	b.d.l.
* Azzone, R.G., Munoz, P.R.M., Enrich, G.E.R, Alves, A., Ruberti, E., Gomes, C.B. Petrographic, geo-chemical and isotopic evidence of crustal assimilation processes in the Ponte Nova alkaline mafic–ultramafic massif, SE Brazil. Lithos 2016, 260, 58–75.
Azzone, R.G., Chmyz, L., Guarino, V., Alves, A., Gomes, C.B., Ruberti, E. Isotopic clues tracking the open-system evolution of the Ponte Nova mafic-ultramafic alkaline massif, SE Brazil: The contribution of Pb isotopes. Geochemistry 2020, 80(4), 125648.
