# Supplementary material
Source: MDPI journal article supplement (https://www.mdpi.com/2075-163X/12/6/775)
Supplement: s1 [file s1 › Supplem Mat C - px_trace_pn_ Revision.xlsx]

## Sheet: Labels
Supplementary Material C - Clinopyroxene trace-element compositions from Ponte Nova Massif
Table SC1. Trace element compositions for BHVO-2G (USGS) calibration (primary) standard used for routines of trace element analyses of PN clinopyroxenes. Recommended values are from GeoReM, preferred values: 1/2009, Jochum (Max-Planck – Institut fuer Chemie); see Jochum et al., 2005.
Table SC2. Trace element compositions for NIST SRM 612, BIR-1 and BCR-2 quality-control monitors (reference materials) used for routines of trace-element analyses of PN clinopyroxenes. Recommended values are from Jochum et al. (2015).
Table SC3. Trace-element compositions for clinopyroxene crystals from PN massif.

## Sheet: SC1. Calibr. STD
Calibration Standards
All values reported in ppm
Trace Element Concentrations (MDL filtered)
run			1	1	1	1	1	1	1		2	2	2	2	2		3	3	3	3	3		4	4	4	4	4		5	5	5	5	5	5	5		6	6	6	6	6	6		7	7	7	7	7	7
Sample	BHVO - 2G Ref. Values		117	117	117	117	117	117	117		117	117	117	117	117		163	163	163	163	163		163	163	163	163	163		41	41	41	41	41	41	41		41	41	41	41	41	41		58	58	58	58	58	58
Element	Concent.	(2-sigma)	BHVO-1a	BHVO-1b	BHVO-1c	BHVO-1d	BHVO-1e	BHVO-1f	BHVO-1g		BHVO-2a	BHVO-2b	BHVO-2c	BHVO-2d	BHVO-2e		BHVO-1a	BHVO-1b	BHVO-1c	BHVO-1d	BHVO-1e		BHVO-2a	BHVO-2b	BHVO-2c	BHVO-2d	BHVO-2e		BHVO-1a	BHVO-1b	BHVO-1c	BHVO-1d	BHVO-1e	BHVO-1f	BHVO-1g		BHVO-2a	BHVO-2b	BHVO-2c	BHVO-2d	BHVO-2e	BHVO-2f		BHVO-1a	BHVO-1b	BHVO-1c	BHVO-1d	BHVO-1e	BHVO-1f
Li7	4.5	0.085	4.19	4.4	4.38	4.9	4.36	4.53	4.12		4.82	5.2	3.42	4.08	5.78		4.41	4.44	4.3	4.33	4.53		4.22	3.76	4.42	4.9	5.31		4.61	4.38	4.26	4.15	1.71	4.42	4.62		5.62	3.76	4.24	4.27	5.24	4.03		4.43	4.17	4.85	4.32	4.36	4.31
P31	1171.73	21.82	1249.15	1246.48	1285.04	1298.81	1273.67	1259.03	1247.86		1355.31	1292.29	1208.52	1323.42	1257.8		1258.89	1265.98	1282.69	1252.83	1268.15		1306.56	1294.16	1131.97	1285.07	1403.57		1291.57	1238.26	1243.82	1291.51	543.25	1276.15	1255.37		1348.94	1248.54	1226.94	1207.51	1394.57	1216.77		1291.48	1293.55	1191.72	1261.36	1277.66	1290.43
Sc45	31.83	0.34	33.18	32.43	33.71	32.49	32.64	33.23	33.33		34.81	35.04	29.1	36.73	32.94		33.15	32.59	33.55	33	32.72		31.96	33.68	30.6	37.08	33.63		32.93	33.01	32.5	33.68	9.58	33.73	32.27		36.56	33.25	31.59	29.73	35.24	33.39		33.53	32.77	31.83	33.98	33.22	32.91
Ti49	5745.49	63.2742	16216.9	16310.9	16311.4	16423.3	16152.4	16628.4	16105.5		19159.4	16746.7	15299.2	17928.7	15804.9		16235.4	16274.9	16514.6	16250.5	16227.1		17011.8	14964.4	15058.7	19586.7	17356.4		16531.2	16008.3	16083.7	16665.5	6614.45	16557.4	16017.2		16326.8	16335.6	15798	16649.6	18722.2	15006.6		16243.7	16257.2	16234.5	16559.2	16450.5	16076.7
V51	318.2	2.3	303.17	306.93	313.24	309.91	306.9	311.36	304.77		289.23	316.37	291.59	314.87	313.68		304.47	310.02	312.27	306.74	306.62		322.85	301.37	283.2	313.55	342.25		312.71	301.21	306.74	313.94	162.17	307.8	305.88		310.6	297.68	296.12	344.97	338.47	279.62		309.88	306.87	309	305.22	311.64	305.45
Cr52	287.2	3.1	288.89	289.65	300.17	295.39	286.8	297.92	292.56		275.18	298.36	280.33	314.1	285.23		292.13	291.91	297.7	291.19	292.14		322.19	282.7	254.24	327.46	319.64		293.07	286.88	298.82	299.83	115.33	295.05	284.77		308.92	287.63	282.54	293.51	313.27	281.47		295.56	293	292.83	288.21	297.47	291.04
Mn55	1340.66	12.392	1290.44	1313.81	1339.32	1333.19	1309.97	1326.73	1303.6		1283.64	1341.02	1252.95	1474.57	1251.51		1303.3	1323.66	1334.44	1305.34	1316.66		1486.3	1214.47	1119.98	1631.41	1509.23		1318.34	1281.94	1352.75	1347.24	543.67	1345.77	1261.77		1401.82	1248.23	1301.55	1319.33	1467.95	1239.04		1325.13	1322.44	1295.77	1313.63	1331.03	1313.2
Co59	44.89	0.32	42.82	43.81	45.22	44.55	43.61	44.45	43.58		48.97	46.29	39.38	49.18	43.32		43.71	44.06	44.59	43.76	43.89		49.51	42.94	40.19	44.58	45.7		44.05	42.25	45.16	46.57	16.75	45.31	41.12		39.62	46.46	46.95	41.93	45.85	43.44		43.85	44.59	42.51	45	44.45	43.78
Ni60	119.8	1.2	114.11	116.38	117.41	115.85	118.33	116.74	113.41		123.75	116.13	113.72	132.58	105.79		115.96	116.23	115.81	114.81	117.27		107.89	117.89	110.44	124.9	124.11		115.7	111.39	120.54	122.2	45.78	117.53	109.39		122.69	106.77	112.53	133.33	114.89	110.59		117.59	115.18	113.37	118.11	115.19	117.11
Cu65	129.3	1.4	124.97	125.56	130.19	128.1	125.67	128.14	126.39								125.14	128.22	129.19	124.67	127.95								126.88	122.2	131.43	133.43	66.19	127.36	121.22									126.9	128.43	126.17	125.46	127.13	127.89
Zn66	103.9	1	98.61	99.97	106.78	104.12	103.7	99.39	101.4		105.87	108.92	89.35	109.16	105.64		100.08	103.07	104.64	100.03	102.36		104.96	96.64	91	117.04	112.96		101.06	99.95	102.63	108.51	55.07	101.24	98.94		104.56	107.24	92.76	109.17	101.12	100.2		101.67	105.71	97.89	100.89	102.35	103.94
Ga71	21.37	0.2	21.88	21.26	22.72	22.35	21.83	22.48	21.56								21.86	22.09	22.13	22.03	21.89								21.59	21.63	22.84	22.93	8.14	21.64	21.38									21.52	22.63	21.57	22.22	22.22	21.85
Sr88	394.1	1.7	399.79	390.94	397.15	395.63	395.98	402.78	390.96		395.86	404.24	378.81	412.9	393.98		394.12	397.19	398.54	391.93	398.45		394.08	390.09	363.27	439.83	430.32		398.58	394.08	385.71	406.32	176.09	403.67	389.79		418	372.35	395.32	403.67	429.96	374.47		395.61	400.27	387.97	397.7	404.78	390.58
Y89	25.91	0.28	26.61	25.51	26.33	25.23	25.69	26.2	26.48		26.02	26.66	24.74	25.93	26.96		26.24	26.02	25.39	26.26	26.12		27.13	25.35	23.47	26.68	29.72		25.92	26.07	25.42	26.7	11.41	26.34	25.63		27.6	27.41	23.57	25.28	29.71	24.39		25.99	26.23	25.47	26.19	26.43	25.73
Zr90	171.2	1.3	172.58	169.19	170.79	165.21	169.59	171.44	171.54		182.57	174.91	159.45	180.77	168.67		170.18	170.1	169.37	170.13	170.24		171.72	178.85	143.06	181.93	200.87		168.99	169.86	168.89	173.75	68.74	173.33	165.71		181.03	168.04	158.88	177.36	181.55	160.93		168.21	172.47	166.43	172.87	172.52	167.83
Nb93	18.1	0.2	18.44	17.98	18.42	18.42	18.19	18.48	18.2		20.96	17.79	19.45	18.44	17.52		17.84	18.97	18.03	18.18	18.53		20.45	18.12	16.26	18.81	19.36		18.55	17.89	18.15	18.77	6.15	18.73	17.78		19.6	16.69	17.94	19.79	20.55	16.53		18.05	18.71	17.74	18.69	18.51	18.17
La139	15.2	0.08	15.41	14.98	15.38	14.86	15.22	15.46	15.13		16	14.92	15.76	15.62	14.53		15.08	15.39	15.08	15.27	15.19		16.92	15.25	13.61	15.32	15.96		15.12	14.97	15.53	15.54	11.08	15.18	14.86		16.64	14.92	14.42	14.7	16.94	14.48		15.25	15.37	14.78	15.29	15.35	15.2
Ce140	37.53	0.19	37.33	37.06	38.31	37.74	37.68	38.45	36.75		36.41	38.63	35.72	36.89	39.63		37.14	38.01	37.96	36.79	38.17		36.66	38.21	36.74	39.9	37.06		37.29	37.08	38.18	38.81	32.54	38.07	36.26		37.6	36.19	38.7	38.3	37.59	37.24		37.36	38.44	36.58	37.72	37.62	37.96
Pr141	5.339	0.028	5.46	5.25	5.38	5.29	5.27	5.48	5.34		6.27	5.61	4.83	5.84	5.33		5.35	5.39	5.29	5.26	5.48		5.43	5.03	4.9	6.13	5.83		5.4	5.15	5.47	5.55	4.68	5.44	5.11		5.21	5.39	5.32	5.45	5.76	5.05		5.47	5.41	5.02	5.45	5.36	5.45
Nd143	24.27	0.25	25.4	23.75	24.52	24.08	24.82	25.22	23.91		25.37	24.24	24.89	25.88	23.19		24.58	24.5	24.34	24.32	24.77		27.71	24.38	21.38	24.18	27.39		24.68	24.11	24.48	24.96	18.99	24.48	24.28		26.09	24	24.12	22.86	27.95	23.32		24.81	25.11	23.5	24.11	24.03	25.63
Sm147	6.023	0.057	6.16	5.92	6.3	5.96	5.97	6.45	5.99		5.97	6.04	6.23	6.05	6.06		6.33	5.98	5.84	6.23	6.15		6.46	5.65	5.7	6.15	7.11		6.06	6.25	6.13	5.85	4.55	6.17	6.17		6.87	5.82	5.57	6.66	6.25	5.83		6.17	6.5	5.4	6.2	6.02	6.48
Eu151	2.043	0.012	2.02	2	2.22	2.03	2.09	2.07	2.06		2.17	2.04	2.11	2.28	1.89		2.09	2.02	2.13	2.13	1.99		2.56	1.91	1.85	2.01	2.31		2.08	2.04	2.04	2.14	1.06	2.05	2.07		1.99	1.96	2.2	2.11	2.36	1.88		2.15	2.01	1.97	2.17	2.02	2.13
Gd155	6.207	0.038	6.22	6.14	6.29	5.8	6.53	6.15	6.05		5.5	6.25	6	5.99	6.42		6.03	6.19	6.42	6.15	6.02		6.43	6.69	4.98	7.07	6.62		6.01	6.28	6.13	6.3	3.51	6.21	6.05		5.8	5.9	6.52	6.37	7.11	5.52		6.43	6.08	5.71	6.46	6.1	6.31
Tb159	0.9392	0.006	0.976	0.91	0.898	0.875	0.93	0.96	0.91		1	0.96	0.83	1.04	0.89		0.945	0.888	0.935	0.917	0.917		0.934	0.979	0.832	0.96	0.937		0.91	0.92	0.88	0.99	0.34	0.96	0.87		0.87	1.06	0.82	0.95	1.18	0.79		0.926	0.938	0.875	0.932	0.923	0.932
Dy163	5.28	0.028	5.26	5.46	5.18	5.19	5.2	5.32	5.37		6.6	5.7	4.52	5.58	5.61		5.66	4.92	5.24	5.6	5.05		5.03	5.36	5.18	4.98	6.04		5.33	5.29	5.1	5.33	2.22	5.36	5.28		4.79	4.99	5.85	5.61	5.83	4.79		5.37	5.31	4.98	5.44	5.35	5.28
Ho165	0.9887	0.0053	0.994	1.013	0.971	0.91	0.98	1.04	0.97		0.755	0.98	0.97	1.06	0.93		0.974	0.976	0.999	1.006	0.946		1.04	1.13	0.88	0.91	0.99		0.979	0.998	0.95	0.98	0.32	0.99	0.988		1.01	1.06	0.892	0.96	1.05	0.95		1.014	0.964	0.925	1.026	0.98	0.99
Er166	2.511	0.014	2.77	2.55	2.5	2.31	2.73	2.44	2.67		2.79	2.57	2.51	2.68	2.49		2.57	2.54	2.57	2.57	2.55		2.93	2.18	2.26	3.03	2.97		2.47	2.63	2.72	2.46	1.42	2.6	2.5		2.42	2.68	2.57	2.46	2.95	2.38		2.84	2.49	2.33	2.54	2.63	2.63
Tm169	0.3349	0.0031	0.327	0.342	0.353	0.341	0.335	0.323	0.358		0.263	0.329	0.371	0.316	0.343		0.333	0.337	0.363	0.349	0.321		0.353	0.358	0.304	0.36	0.345		0.313	0.379	0.349	0.325	0.32	0.338	0.344		0.374	0.364	0.295	0.336	0.385	0.318		0.352	0.347	0.308	0.349	0.345	0.347
Yb173	1.994	0.027	1.82	2.05	2.17	2.06	1.95	2.04	1.99		2.64	2.04	1.94	2.04	2.03		2.21	1.93	1.78	2.16	2.03		1.94	2.36	1.73	1.87	2.36		2.02	2.05	1.93	1.99	0.57	2.14	1.96		2.03	2.02	1.81	2.44	2.06	1.84		2.1	2.04	1.99	1.83	2	2.12
Lu175	0.2754	0.0024	0.284	0.259	0.289	0.297	0.264	0.284	0.28		0.298	0.257	0.34	0.29	0.24		0.27	0.28	0.298	0.285	0.263		0.328	0.305	0.309	0.239	0.218		0.285	0.271	0.275	0.288	0.263	0.286	0.271		0.276	0.266	0.283	0.307	0.268	0.276		0.258	0.283	0.27	0.332	0.279	0.264
Hf179	4.47	0.025	4.58	4.14	4.47	3.89	4.42	4.85	4.09		4.86	4.32	4.32	4.31	4.33		4.27	4.3	4.56	3.95	4.59		4.8	4.19	3.73	4.88	4.53		4.26	4.42	4.19	4.42	2.9	4.26	4.38		4.63	4.2	4.31	4.05	4.47	4.36		4.35	4.25	4.38	4.33	4.31	4.3
Ta181	1.154	0.019	1.168	1.15	1.141	1.136	1.16	1.09	1.2		0.96	1.167	1.115	1.15	1.17		1.16	1.16	1.12	1.07	1.27		1.34	1.11	1	1.29	1.14		1.114	1.166	1.148	1.21	0.72	1.17	1.1		1.09	1.24	1.06	1.22	1.38	1.01		1.177	1.15	1.105	1.156	1.18	1.14
Pb208	1.653	0.038	1.71	1.63	1.75	1.71	1.77	1.61	1.72		1.8	1.86	1.43	1.84	1.81		1.69	1.69	1.77	1.65	1.71		1.62	1.36	1.46	2.55	2.44		1.66	1.74	1.78	1.61	1.91	1.67	1.74		2.14	1.76	1.39	1.72	1.76	1.69		1.82	1.64	1.73	1.6	1.74	1.7
Th232	1.224	0.016	1.33	1.21	1.13	1.24	1.24	1.16	1.26		1.16	1.29	1.08	1.39	1.19		1.272	1.181	1.191	1.22	1.24		1.3	1.31	1.03	1.22	1.39		1.229	1.211	1.203	1.241	0.64	1.219	1.219		1.26	1.3	1.11	1.23	1.35	1.15		1.236	1.265	1.163	1.18	1.23	1.25
U238	0.412	0.035	0.431	0.405	0.387	0.384	0.388	0.397	0.436		0.572	0.421	0.369	0.427	0.408		0.416	0.398	0.389	0.392	0.423		0.466	0.393	0.34	0.408	0.471		0.405	0.398	0.407	0.404	0.116	0.416	0.39		0.457	0.372	0.38	0.434	0.414	0.386		0.404	0.399	0.386	0.429	0.432	0.375
(BHVO-2G: GeoReM, preferred values: 1/2009, Jochum (Max-Planck – Institut fuer Chemie); see Jochum et al., 2005)
Jochum K.P., Nohl U., Herwig K., Lammel E., Stoll B., Hofmann A.W. 2005. GeoReM: A New Geochemical Database for Reference Materials and Isotopic Standards. Geostandards and Geoanalytical Research, 29(3), 333‑338.
Uncertanties (1-sigma errors)
Element			BHVO-1a	BHVO-1b	BHVO-1c	BHVO-1d	BHVO-1e	BHVO-1f	BHVO-1g		bhvo-2a	bhvo-2b	bhvo-2c	bhvo-2d	bhvo-2e		BHVO-1a	BHVO-1b	BHVO-1c	BHVO-1d	BHVO-1e		Bhvo-2a	Bhvo-2b	Bhvo-2c	bhvo-2d	bhvo-2e		bhvo-1a	bhvo-1b	bhvo-1c	bhvo-1d	bhvo-1e	bhvo-1f	bhvo-1g		bhvo-2a	bhvo-2b	bhvo-2c	bhvo-2d	bhvo-2e	bhvo-2f		bhvo-1a	bhvo-1b	bhvo-1c	bhvo-1d	bhvo-1e	bhvo-1f
Li7			0.53	0.55	0.55	0.71	0.77	0.82	0.76		2.39	2.57	2.12	3.1	4.54		0.34	0.35	0.36	0.4	0.42		0.77	0.67	0.74	0.89	0.94		0.5	0.48	0.52	0.52	0.8	0.65	0.68		1.31	0.89	1	1.22	1.86	1.62		0.55	0.52	0.64	0.59	0.71	0.72
P31			140.31	140.3	144.97	150.31	153.28	152.53	152.19		719.03	686.13	649.05	719.21	685.4		140.11	140.83	142.81	140.19	142.11		705.29	698.47	610.96	693.83	757.68		148.14	142.46	149.37	156.11	73.01	164.2	162.97		378.06	351.09	346.32	360.23	444.22	405.25		164.94	165.46	158.36	169.11	190.33	194.91
Sc45			1.41	1.39	1.46	1.56	1.82	1.9	1.95		6.5	6.58	7.04	11.16	10.46		1.28	1.27	1.42	1.54	1.56		2.34	2.45	2.22	2.71	2.46		1.44	1.45	1.63	1.73	0.97	2.08	2.04		3.73	3.41	3.27	4.03	6.3	6.93		1.68	1.65	1.82	1.99	2.5	2.55
Ti49			587.57	593.73	597.2	646.63	710.29	744.28	733.7		2460.34	2154.2	2454.38	3536.04	3245.74		543.97	546.83	582.65	608.89	616.56		1753.91	1542.54	1552.11	2019.61	1789.77		725.69	707.24	821.59	870.99	429.37	1054.92	1046.51		1646.31	1645.61	1599.5	2116.75	3026.38	2750.67		578.59	580.72	613.03	633	720.58	716.42
V51			11.36	11.56	11.87	12.75	14.25	14.73	14.69		22.51	24.73	28.63	38.24	39.74		10.82	11.07	12	12.84	13.08		23.28	21.72	20.41	22.63	24.69		12.58	12.19	14.12	14.76	9.72	17.43	17.75		34.64	33.34	33.49	50.69	65.2	62.3		10.59	10.5	10.98	10.94	12.3	12.21
Cr52			12.61	12.75	13.35	14.83	17.02	18.13	18.26		25.98	28.28	33.53	46.6	44.16		10.33	10.36	11.26	11.89	12.14		34.54	30.3	27.25	35.12	34.28		13.7	13.52	16.64	17.13	8.79	21.05	20.89		20.76	19.41	19.23	25.26	34.79	35.99		10.92	10.85	11.48	11.44	13.57	13.51
Mn55			49.93	51.16	52.57	57.63	65.09	67.36	67.62		178.63	186.66	215.78	310.63	274.21		45.67	46.6	50.79	54.4	55.99		222.46	181.76	167.62	244.2	225.91		74.68	73.4	95.42	98.02	50.46	126.71	122.66		128.22	114.18	119.76	152.85	216.93	208.19		46.12	46.15	47.54	48.73	55.94	56.08
Co59			1.94	2.01	2.09	2.34	2.72	2.85	2.86		8.26	7.88	8.95	14.37	13.3		1.53	1.55	1.65	1.73	1.77		3.95	3.43	3.21	3.58	3.67		3.62	3.51	4.76	5.07	2.54	6.5	6.09		3.73	4.36	4.43	4.98	6.95	7.49		2.07	2.12	2.26	2.45	3.04	3.08
Ni60			4.88	5.01	5.09	5.59	6.62	6.69	6.64		23.5	21.98	25.69	36	30.02		4.17	4.19	4.38	4.6	4.77		11.86	12.11	11.33	13.67	13.59		9.01	8.78	12.03	12.62	7.12	16.01	15.41		15.1	13.16	13.8	20.17	22.16	24.15		5.04	4.95	5.32	5.65	6.67	6.94
Cu65			5.27	5.33	5.57	6.09	6.94	7.24	7.3								5.35	5.53	6.33	7	7.39								8.95	8.73	11.76	12.33	8.86	15.41	15.15									4.65	4.7	4.79	4.82	5.38	5.48
Zn66			6.11	6.26	6.77	7.71	9.32	9.19	9.63		20.23	20.7	20.42	29.98	30.07		4.73	4.91	5.75	6.36	6.71		11.01	10.1	9.51	12.29	11.87		6.25	6.27	8.12	8.89	7.16	11.05	11.19		9.62	9.83	8.57	12.49	14.7	16.55		5.81	6.08	6.41	6.78	8.83	9.22
Ga71			1.17	1.15	1.24	1.43	1.71	1.81	1.79								0.74	0.75	0.77	0.8	0.8								1.3	1.32	1.73	1.79	1.18	2.22	2.26									1.01	1.07	1.13	1.19	1.48	1.49
Sr88			14.36	14.12	14.43	15.54	17.5	18.15	17.95		28.64	29.44	35.16	47.95	47.85		12.99	13.13	13.87	14.52	14.98		29.93	29.61	27.58	33.41	32.69		18.02	17.96	20.72	22.39	12.28	27.69	27.49		34.27	30.53	32.59	41.68	56.42	55.79		16.13	16.4	17.42	18.21	22.59	22.31
Y89			1.29	1.25	1.31	1.44	1.78	1.86	1.93		2.06	2.1	2.36	2.98	3.21		1.05	1.05	1.16	1.36	1.39		2.32	2.16	2	2.29	2.54		1.12	1.13	1.28	1.37	0.99	1.66	1.66		3.31	3.3	2.86	3.99	6.14	5.82		1.02	1.03	1.09	1.14	1.38	1.37
Zr90			6.99	6.9	7.03	7.57	9.05	9.36	9.59		19	18.19	20.23	27.82	26.95		5.39	5.39	5.39	5.46	5.47		20.73	21.58	17.26	21.96	24.25		7.09	7.18	8.25	8.69	4.83	10.62	10.43		15.47	14.36	13.67	19.18	25.06	25.28		7.07	7.29	7.82	8.31	10.39	10.38
Nb93			0.68	0.67	0.68	0.73	0.8	0.83	0.83		1.89	1.61	2.18	2.55	2.52		0.93	1.01	1.15	1.38	1.45		1.79	1.59	1.43	1.66	1.7		0.92	0.9	1.09	1.16	0.72	1.47	1.44		2.56	2.18	2.35	3.24	4.26	3.88		0.88	0.92	0.98	1.06	1.33	1.34
La139			0.64	0.62	0.65	0.7	0.83	0.87	0.87		1.23	1.15	1.45	1.74	1.68		0.53	0.54	0.56	0.62	0.62		1.4	1.26	1.12	1.27	1.32		0.67	0.66	0.8	0.82	0.92	0.98	0.99		1.67	1.5	1.46	1.89	2.79	2.72		0.62	0.62	0.66	0.69	0.85	0.86
Ce140			1.59	1.59	1.66	1.85	2.18	2.28	2.23		3.23	3.44	4.04	5.2	5.83		1.54	1.59	1.83	2.05	2.19		1.62	1.68	1.62	1.77	1.65		1.86	1.87	2.32	2.43	2.75	3.03	2.98		1.69	1.62	1.74	2	2.36	2.6		1.57	1.63	1.71	1.81	2.23	2.31
Pr141			0.24	0.23	0.24	0.27	0.31	0.33	0.33		1	0.89	0.93	1.36	1.29		0.23	0.23	0.26	0.3	0.32		0.5	0.47	0.45	0.57	0.54		0.35	0.34	0.44	0.46	0.6	0.59	0.57		0.36	0.37	0.37	0.46	0.61	0.61		0.36	0.35	0.38	0.43	0.56	0.59
Nd143			1.49	1.41	1.47	1.69	2.11	2.21	2.15		2.34	2.23	2.71	3.39	3.15		0.94	0.94	0.97	1.01	1.05		2.93	2.57	2.26	2.58	2.91		1	0.99	1.09	1.13	2.29	1.29	1.3		2.8	2.58	2.6	3.12	4.89	4.65		1.61	1.64	1.8	1.9	2.53	2.78
Sm147			0.46	0.44	0.47	0.53	0.64	0.71	0.68		0.48	0.46	0.49	0.55	0.55		0.46	0.44	0.52	0.66	0.68		0.7	0.61	0.61	0.69	0.78		0.36	0.37	0.42	0.41	1.02	0.53	0.54		0.86	0.73	0.7	1.02	1.21	1.27		0.77	0.82	0.83	0.98	1.32	1.47
Eu151			0.16	0.16	0.18	0.19	0.24	0.24	0.25		0.32	0.3	0.39	0.52	0.46		0.14	0.14	0.18	0.21	0.21		0.35	0.26	0.25	0.28	0.32		0.11	0.11	0.12	0.13	0.26	0.15	0.15		0.23	0.23	0.25	0.32	0.48	0.45		0.18	0.17	0.19	0.21	0.26	0.28
Gd155			0.52	0.52	0.53	0.58	0.79	0.77	0.78		0.56	0.6	0.65	0.79	0.85		0.41	0.42	0.51	0.58	0.59		0.97	0.99	0.75	1.07	1.01		0.36	0.37	0.4	0.42	0.97	0.49	0.48		0.77	0.78	0.86	1.09	1.6	1.45		0.59	0.56	0.63	0.74	0.97	1.05
Tb159			0.082	0.077	0.077	0.087	0.11	0.12	0.11		0.19	0.18	0.19	0.3	0.26		0.061	0.059	0.071	0.082	0.085		0.088	0.088	0.076	0.093	0.091		0.089	0.091	0.11	0.12	0.12	0.16	0.14		0.19	0.23	0.18	0.26	0.42	0.32		0.061	0.061	0.064	0.07	0.088	0.091
Dy163			0.3	0.31	0.3	0.34	0.41	0.43	0.44		1.58	1.34	1.19	1.68	1.73		0.64	0.57	0.79	1.06	1		0.49	0.49	0.47	0.5	0.58		0.28	0.28	0.3	0.32	0.56	0.38	0.38		0.68	0.7	0.82	0.99	1.31	1.23		0.36	0.36	0.39	0.44	0.58	0.59
Ho165			0.09	0.093	0.09	0.1	0.14	0.15	0.14		0.096	0.12	0.14	0.18	0.17		0.064	0.064	0.074	0.086	0.084		0.13	0.13	0.1	0.11	0.12		0.053	0.055	0.058	0.061	0.11	0.072	0.073		0.11	0.11	0.097	0.12	0.17	0.17		0.081	0.077	0.085	0.097	0.12	0.13
Er166			0.35	0.33	0.32	0.37	0.55	0.52	0.58		0.28	0.26	0.28	0.34	0.33		0.14	0.14	0.14	0.14	0.14		0.48	0.36	0.37	0.5	0.49		0.21	0.22	0.28	0.26	0.42	0.35	0.34		0.3	0.33	0.31	0.38	0.58	0.53		0.34	0.3	0.34	0.39	0.56	0.58
Tm169			0.033	0.034	0.035	0.039	0.046	0.047	0.052		0.046	0.053	0.072	0.081	0.09		0.036	0.037	0.047	0.054	0.052		0.045	0.043	0.037	0.048	0.046		0.041	0.05	0.057	0.055	0.12	0.073	0.077		0.064	0.061	0.05	0.069	0.097	0.091		0.04	0.039	0.04	0.046	0.058	0.061
Yb173			0.23	0.25	0.27	0.3	0.35	0.37	0.37		0.29	0.24	0.23	0.27	0.26		0.37	0.33	0.38	0.54	0.53		0.32	0.37	0.28	0.32	0.38		0.17	0.18	0.2	0.21	0.35	0.28	0.26		0.36	0.35	0.31	0.49	0.5	0.5		0.24	0.23	0.26	0.25	0.35	0.38
Lu175			0.034	0.032	0.035	0.041	0.045	0.049	0.049		0.09	0.078	0.12	0.12	0.11		0.032	0.033	0.04	0.045	0.043		0.064	0.058	0.058	0.051	0.048		0.025	0.024	0.026	0.028	0.096	0.033	0.031		0.035	0.032	0.033	0.042	0.046	0.051		0.042	0.046	0.053	0.067	0.08	0.079
Hf179			0.67	0.62	0.68	0.71	1.01	1.15	1		0.34	0.3	0.29	0.31	0.3		0.5	0.52	0.69	0.75	0.9		0.57	0.5	0.45	0.59	0.55		0.27	0.28	0.31	0.33	0.84	0.39	0.41		0.39	0.35	0.35	0.38	0.5	0.53		0.25	0.24	0.25	0.26	0.27	0.27
Ta181			0.081	0.08	0.08	0.091	0.11	0.11	0.12		0.082	0.091	0.098	0.12	0.12		0.13	0.14	0.17	0.2	0.25		0.17	0.14	0.12	0.16	0.15		0.081	0.085	0.098	0.11	0.17	0.13	0.12		0.17	0.19	0.17	0.26	0.4	0.35		0.074	0.072	0.077	0.083	0.1	0.1
Pb208			0.13	0.12	0.13	0.15	0.19	0.18	0.2		0.44	0.45	0.45	0.72	0.73		0.1	0.1	0.13	0.13	0.14		0.43	0.36	0.39	0.67	0.65		0.13	0.14	0.17	0.16	0.37	0.2	0.22		0.39	0.33	0.27	0.46	0.65	0.76		0.16	0.15	0.18	0.17	0.25	0.26
Th232			0.14	0.13	0.12	0.17	0.21	0.2	0.23		0.24	0.27	0.28	0.45	0.4		0.088	0.084	0.099	0.12	0.12		0.16	0.16	0.13	0.16	0.18		0.058	0.058	0.061	0.064	0.15	0.071	0.071		0.15	0.15	0.13	0.17	0.22	0.21		0.092	0.094	0.099	0.1	0.14	0.15
U238			0.047	0.045	0.043	0.052	0.066	0.07	0.078		0.094	0.071	0.067	0.088	0.086		0.037	0.035	0.04	0.046	0.051		0.071	0.06	0.052	0.065	0.073		0.028	0.028	0.03	0.031	0.059	0.037	0.035		0.063	0.052	0.052	0.069	0.08	0.082		0.045	0.045	0.051	0.058	0.079	0.072
Minimum detection limits (99% confidence).
Element			BHVO-1a	BHVO-1b	BHVO-1c	BHVO-1d	BHVO-1e	BHVO-1f	BHVO-1g		bhvo-2a	bhvo-2b	bhvo-2c	bhvo-2d	bhvo-2e		BHVO-1a	BHVO-1b	BHVO-1c	BHVO-1d	BHVO-1e		Bhvo-2a	Bhvo-2b	Bhvo-2c	bhvo-2d	bhvo-2e		bhvo-1a	bhvo-1b	bhvo-1c	bhvo-1d	bhvo-1e	bhvo-1f	bhvo-1g		bhvo-2a	bhvo-2b	bhvo-2c	bhvo-2d	bhvo-2e	bhvo-2f		bhvo-1a	bhvo-1b	bhvo-1c	bhvo-1d	bhvo-1e	bhvo-1f
Li7			0.121	0.112	0.101	0.107	0.121	0.0693	0.0941		0.303	0.556	0.277	0.54	0.332		0.108	0.106	0.0774	0.127	0.0958		0.519	0.367	0.239	0.565	0.507		0.113	0.118	0.09	0.164	<0.00000	0.0691	0.0711		0.304	0.273	0.291	0.265	0.296	0.294		0.156	0.0909	0.0637	0.0953	0.0898	0.0602
P31			3.95	3.8	3.99	4.16	3.94	3.81	3.93		34.97	36.74	30.34	38.78	35.07		3.83	3.63	3.88	3.8	3.54		35.59	30.26	27.71	42.12	38.67		4.11	4.23	4.75	4.67	5.76	4.91	4.6		18.38	17.7	16.97	18.49	20.15	18.3		5.34	4.43	4.24	4.63	4.42	4.49
Sc45			0.121	0.122	0.108	0.121	0.131	0.106	0.117		0.371	0.43	0.344	0.426	0.393		0.108	0.108	0.112	0.0983	0.0988		0.378	0.324	0.295	0.435	0.414		0.0952	0.104	0.106	0.119	0.128	0.111	0.106		0.259	0.254	0.251	0.262	0.304	0.24		0.129	0.107	0.107	0.12	0.118	0.113
Ti49			0.378	0.318	0.464	0.406	0.315	0.452	0.417		1.89	1.06	0.87	1.57	1.81		0.312	0.312	0.363	0.351	0.317		0.783	0.957	1.25	0.966	2.09		0.387	0.591	0.349	0.264	0.477	0.258	0.327		0.653	0.463	0.765	<0.00000	<0.00000	0.576		0.247	0.222	0.401	0.276	0.277	0.355
V51			0.0334	0.0303	0.0404	0.0353	0.0296	0.0287	0.0347		0.106	0.107	0.0873	0.118	0.107		0.0295	0.0288	0.0415	0.03	0.0286		0.127	0.103	0.0856	0.14	0.132		0.0462	0.0519	0.0415	0.0395	0.0556	0.0421	0.0421		0.0984	0.0686	0.072	0.0741	0.101	0.0571		0.0525	0.0471	0.047	0.0425	0.0332	0.0361
Cr52			0.721	0.723	0.745	0.774	0.754	0.707	0.725		2.02	2.14	1.78	2.36	2.13		0.808	0.767	0.779	0.79	0.75		2.07	1.75	1.68	2.39	2.26		0.898	0.928	0.988	0.989	1.19	0.99	0.988		1.57	1.5	1.48	1.53	1.76	1.5		1.07	0.939	0.897	0.963	0.926	0.919
Mn55			0.176	0.176	0.18	0.193	0.178	0.162	0.183		0.851	0.966	0.756	0.925	0.894		0.17	0.169	0.169	0.169	0.161		0.844	0.739	0.675	1.03	1.04		0.151	0.16	0.199	0.197	0.224	0.204	0.204		0.464	0.445	0.453	0.468	0.478	0.413		0.23	0.196	0.192	0.21	0.202	0.202
Co59			0.012	0.0117	0.0124	0.0135	0.01	0.00931	<0.00000		0.0509	<0.00000	0.062	0.0479	<0.00000		0.0164	0.0132	0.0144	0.0149	0.00774		0.0351	<0.00000	0.0396	0.0751	0.0841		0.0112	0.0168	0.0152	<0.00000	0.0322	0.0124	0.0181		0.0393	0.0484	0.0462	0.0391	0.0443	0.0362		<0.00000	<0.00000	0.011	0.0204	0.00834	0.0178
Ni60			0.048	0.0571	0.0494	0.0936	0.0698	0.0563	0.105		<0.00000	<0.00000	2.2	<0.00000	<0.00000		0.04	0.0643	0.0706	0.0424	0.0663		<0.00000	2.9	3.27	<0.00000	<0.00000		0.0398	0.0729	0.0443	0.0445	<0.00000	0.0997	0.0924		<0.00000	1.91	1.29	<0.00000	<0.00000	<0.00000		0.0687	0.0873	0.0562	0.0734	0.0743	0.058
Cu65			0.0401	0.0616	0.0715	0.0452	0.0585	0.0471	0.0776								0.0338	0.0542	0.0594	0.0502	0.0454								0.0494	0.064	0.0672	0.0674	<0.00000	0.055	0.0806									0.0964	0.0671	0.0499	0.0376	0.0539	0.0364
Zn66			0.121	0.141	0.161	0.14	0.122	0.155	0.118		0.553	0.553	0.306	0.538	0.436		0.163	0.163	0.146	0.137	0.151		0.627	0.429	0.468	0.821	0.593		0.211	0.15	0.223	0.176	0.288	0.136	0.134		0.563	0.328	0.543	0.425	0.532	0.399		0.175	0.209	0.13	0.156	0.171	0.159
Ga71			0.0163	0.0183	0.0168	0.015	0.0274	0.0221	0.0195								0.0221	0.0205	0.0194	0.0163	0.0295								0.0198	0.0296	0.0257	<0.00000	0.0481	0.0262	0.0192									0.0245	0.0127	0.0324	0.0272	0.0211	0.0116
Sr88			0.00416	0.0107	0.0149	0.00664	<0.00000	0.00801	0.00965		0.0178	<0.00000	<0.00000	0.0231	0.0309		0.00683	0.011	0.00488	0.00874	0.0112		0.0244	0.0149	0.0218	0.0337	0.0206		<0.00000	0.0138	0.00509	0.0051	<0.00000	0.00506	0.00907		0.0195	0.0139	0.00935	0.0166	<0.00000	0.0153		<0.00000	0.00715	0.00907	0.0108	0.00479	0.00646
Y89			0.00918	0.0109	0.00947	0.0104	0.00672	<0.00000	<0.00000		0.0297	0.0272	0.0269	<0.00000	<0.00000		0.0105	0.00691	0.0132	0.00791	0.00715		0.0214	0.0131	0.0121	0.0264	0.0181		0.00916	<0.00000	0.0101	0.0101	<0.00000	0.0058	0.00601		0.0174	<0.00000	<0.00000	0.0126	0.0146	0.0121		0.00903	<0.00000	0.00522	0.00557	0.00563	0.00538
Zr90			0.0123	<0.00000	0.0255	0.014	<0.00000	0.0238	0.0128		0.0475	0.0376	0.0522	0.038	<0.00000		0.02	0.0131	0.0145	0.0262	0.0137		0.0311	<0.00000	0.0248	0.0542	0.0526		0.0148	0.011	0.02	<0.00000	<0.00000	0.0164	0.017		<0.00000	0.0248	0.0334	0.0245	<0.00000	0.0227		<0.00000	0.0192	0.0102	0.0154	0.0111	0.0106
Nb93			0.00776	0.00755	0.0098	0.0108	0.00989	<0.00000	0.00811		0.0328	0.0213	<0.00000	0.0231	0.0434		0.0112	0.0104	<0.00000	0.00673	0.00607		<0.00000	0.0147	<0.00000	0.0363	0.0352		<0.00000	0.0113	0.012	<0.00000	<0.00000	<0.00000	<0.00000		0.0136	0.0136	<0.00000	0.0131	0.0145	0.0118		0.00743	0.00667	0.00603	0.0111	<0.00000	0.00616
La139			0.00561	0.00386	<0.00000	<0.00000	0.00409	0.0066	0.00411		0.0189	0.026	0.0122	0.0156	0.0146		0.00644	0.00597	0.00464	<0.00000	0.00616		<0.00000	0.0174	<0.00000	0.0144	0.0139		0.00812	0.00428	<0.00000	<0.00000	<0.00000	0.00441	0.00457		0.0132	0.0133	<0.00000	<0.00000	0.0149	0.0122		<0.00000	<0.00000	<0.00000	0.00424	0.00613	0.00586
Ce140			0.00693	0.00336	0.00713	0.00388	<0.00000	0.00464	0.00353		0.0117	<0.00000	<0.00000	<0.00000	0.0138		0.0081	0.00375	0.00706	0.0042	0.00537		0.0167	<0.00000	0.00941	0.0206	<0.00000		0.00403	0.00426	<0.00000	0.00636	0.0117	0.0045	<0.00000		0.00957	0.00963	0.0206	<0.00000	<0.00000	0.0126		0.0048	<0.00000	0.00678	<0.00000	<0.00000	0.00402
Pr141			0.00302	0.00587	0.0044	0.00482	0.00541	0.00291	0.00314		0.0109	<0.00000	0.00971	<0.00000	0.0255		<0.00000	0.00324	0.00355	0.0052	0.00664		0.0137	<0.00000	0.0154	0.0119	0.0164		<0.00000	0.00362	0.00378	0.00656	<0.00000	<0.00000	0.0039		0.00739	0.0129	0.0101	<0.00000	0.00851	<0.00000		0.00404	<0.00000	0.00467	<0.00000	<0.00000	<0.00000
Nd143			0.0285	0.0479	<0.00000	0.0319	0.0411	0.0382	0.0412		<0.00000	<0.00000	0.0792	0.123	0.0664		0.0454	0.0297	<0.00000	0.0333	0.0301		0.0579	<0.00000	0.0462	0.0715	0.0693		0.0297	<0.00000	0.0329	0.0467	0.0859	<0.00000	0.0484		0.0463	<0.00000	0.0444	<0.00000	<0.00000	0.0427		0.0344	<0.00000	0.0285	0.043	0.0442	<0.00000
Sm147			0.0252	0.0347	0.026	<0.00000	0.0262	0.0244	0.0456		0.147	0.0836	0.0743	0.1	0.165		<0.00000	<0.00000	<0.00000	0.0311	0.0281		0.0781	0.0956	0.0623	0.136	<0.00000		<0.00000	0.0473	<0.00000	0.0498	0.0746	0.0287	0.0297		0.0597	<0.00000	0.0572	0.0585	0.161	0.0534		<0.00000	0.0463	0.0427	<0.00000	0.0271	0.0259
Eu151			<0.00000	<0.00000	<0.00000	0.011	0.00697	0.00647	0.00983		0.0315	0.0436	0.0434	<0.00000	0.0469		<0.00000	<0.00000	0.00842	0.00876	0.0112		<0.00000	0.0185	<0.00000	0.0263	0.0361		0.00812	<0.00000	0.00871	<0.00000	<0.00000	0.00848	0.00876		<0.00000	<0.00000	<0.00000	<0.00000	<0.00000	0.0243		<0.00000	0.00838	<0.00000	0.0115	0.00824	0.00787
Gd155			0.0358	0.0348	0.0522	<0.00000	0.0528	<0.00000	<0.00000		<0.00000	<0.00000	<0.00000	0.26	0.123		0.0561	<0.00000	0.0421	0.0635	0.0408		0.0959	0.117	<0.00000	<0.00000	<0.00000		0.0342	0.051	<0.00000	<0.00000	<0.00000	<0.00000	0.0373		0.0744	0.107	<0.00000	0.18	<0.00000	0.114		<0.00000	<0.00000	<0.00000	<0.00000	<0.00000	<0.00000
Tb159			0.00504	0.00489	<0.00000	<0.00000	<0.00000	0.00463	0.00498		<0.00000	<0.00000	0.019	<0.00000	<0.00000		<0.00000	0.00725	<0.00000	<0.00000	<0.00000		0.0124	0.0152	0.00991	0.0153	<0.00000		0.00459	0.00684	0.00702	0.00497	<0.00000	<0.00000	0.00711		<0.00000	0.0109	0.0104	0.0245	0.0125	<0.00000		0.00508	0.00458	0.00603	<0.00000	0.00477	0.00457
Dy163			0.0193	0.0189	0.0284	0.0227	0.0303	<0.00000	0.0217		<0.00000	<0.00000	0.138	<0.00000	0.0763		0.0218	0.0287	<0.00000	0.0242	0.0219		<0.00000	0.0584	0.0933	0.0834	0.114		0.0181	0.0191	<0.00000	<0.00000	<0.00000	<0.00000	0.0194		<0.00000	<0.00000	<0.00000	<0.00000	<0.00000	0.0522		0.02	<0.00000	<0.00000	<0.00000	0.0192	0.0184
Ho165			<0.00000	0.00509	0.00765	0.006	0.00786	0.00518	<0.00000		0.0192	0.0153	0.0131	<0.00000	0.0163		0.00831	0.0109	<0.00000	<0.00000	<0.00000		<0.00000	0.0118	0.0109	0.0168	<0.00000		0.00454	<0.00000	0.00505	<0.00000	<0.00000	0.00509	0.00528		0.0106	<0.00000	<0.00000	<0.00000	<0.00000	0.0091		0.00949	<0.00000	<0.00000	0.00684	<0.00000	<0.00000
Er166			0.0156	0.0152	0.0161	0.0252	0.0165	0.0218	0.0166		<0.00000	0.0684	0.0413	0.0542	0.0886		<0.00000	<0.00000	<0.00000	<0.00000	<0.00000		<0.00000	<0.00000	0.033	<0.00000	0.07		0.0139	0.0146	<0.00000	<0.00000	<0.00000	0.0206	<0.00000		<0.00000	0.059	<0.00000	0.0496	0.0576	<0.00000		0.0159	<0.00000	0.0188	0.0201	0.0148	<0.00000
Tm169			0.00874	0.00852	<0.00000	<0.00000	<0.00000	0.0103	0.00555		0.0116	<0.00000	0.0175	0.0301	0.0166		<0.00000	0.00544	0.00607	0.00901	<0.00000		0.0119	0.0146	<0.00000	0.0147	0.0142		<0.00000	0.00705	0.00894	0.00732	<0.00000	0.00721	<0.00000		0.0108	0.0109	0.0104	0.0186	<0.00000	0.0099		0.00567	0.00882	0.00463	0.00494	<0.00000	<0.00000
Yb173			0.0282	0.0274	<0.00000	<0.00000	0.0568	0.0264	0.0284		0.0635	0.124	0.0825	0.0746	<0.00000		0.0479	0.0312	0.0461	0.0327	0.0293		0.0799	<0.00000	0.0638	<0.00000	0.0676		<0.00000	<0.00000	0.0399	<0.00000	0.0741	0.0403	<0.00000		0.0486	<0.00000	<0.00000	<0.00000	0.0472	0.065		<0.00000	<0.00000	<0.00000	<0.00000	0.0386	<0.00000
Lu175			0.0104	0.00503	0.00534	0.00582	0.0075	<0.00000	0.00752		0.0143	<0.00000	0.013	<0.00000	0.0155		<0.00000	0.00532	0.00576	0.0103	0.00534		<0.00000	0.0172	<0.00000	0.0173	0.0168		0.0047	<0.00000	<0.00000	0.00492	<0.00000	0.0047	0.00686		0.00988	0.01	<0.00000	0.0156	0.0134	0.0115		0.00878	0.00458	0.00434	0.00658	<0.00000	0.00478
Hf179			<0.00000	0.0469	<0.00000	<0.00000	0.0593	<0.00000	0.0343		0.0482	<0.00000	0.0622	0.056	0.0526		0.0613	0.0569	0.0369	0.0389	<0.00000		0.0431	<0.00000	0.0344	0.0753	0.0516		0.0278	0.0294	0.0315	0.0317	<0.00000	<0.00000	<0.00000		0.0352	0.0611	0.0335	0.0334	<0.00000	0.0296		0.0482	0.0307	<0.00000	<0.00000	0.0315	0.0301
Ta181			0.00656	0.0045	0.00675	0.00518	0.00471	<0.00000	<0.00000		0.0123	0.014	0.0224	<0.00000	0.0171		0.00741	0.00487	<0.00000	0.00572	0.00518		<0.00000	<0.00000	<0.00000	0.0161	0.0156		<0.00000	0.00506	<0.00000	<0.00000	<0.00000	<0.00000	<0.00000		0.00974	<0.00000	0.00955	<0.00000	0.0134	0.0115		<0.00000	0.00697	0.00449	<0.00000	0.00485	0.00463
Pb208			0.0105	0.00914	0.00967	0.0128	0.0106	0.00439	<0.00000		0.0166	0.0132	0.011	0.0202	0.0233		0.00951	0.00875	0.0106	0.0141	0.0135		0.0316	0.0193	0.0178	0.0276	0.0189		0.0219	0.0155	0.00706	0.0122	0.0179	0.0137	0.0123		0.0159	0.0162	0.0156	0.0289	0.0281	0.0199		0.0149	0.00672	0.0107	0.0114	0.0117	0.0112
Th232			0.00689	0.00474	0.00711	0.00553	<0.00000	0.00473	0.00722		0.0134	<0.00000	0.0126	0.0164	0.0218		0.00798	0.00905	0.00568	0.00585	<0.00000		0.0163	<0.00000	0.00921	0.0201	0.0195		0.00647	<0.00000	<0.00000	<0.00000	<0.00000	0.0073	<0.00000		<0.00000	0.0143	<0.00000	0.013	<0.00000	<0.00000		<0.00000	0.0073	<0.00000	<0.00000	0.00502	0.0083
U238			<0.00000	<0.00000	0.00293	0.00324	<0.00000	0.00279	<0.00000		0.0178	0.0197	<0.00000	0.0127	0.0118		0.00371	<0.00000	0.00614	<0.00000	0.00318		0.0103	0.00892	<0.00000	<0.00000	<0.00000		<0.00000	0.00415	0.00426	<0.00000	<0.00000	<0.00000	0.00432		0.0103	<0.00000	0.00981	0.00987	<0.00000	0.00883		<0.00000	0.00412	0.00383	<0.00000	<0.00000	<0.00000

## Sheet: SC2. Qual.Control. Std
Quality-control standards
All values are reported in ppm
Trace Element Concentrations (MDL filtered).
run			1	1	1	1	1	3	3	3	3	5	5	5	5	7	7	7	7							1	1	3	5	5	7	7	8	8	10	10	10	12	12	12						2	4	6	9
Sample	NIST-612 - Ref. Values		117	117	117	117	117	163	163	163	163	41	41	41	41	58	58	58	58	Average				BIR-1 - Ref. Value		117	117	163	41	41	58	58	165b	165b	30	30	30	180	180	180	Average			BCR-2 - Ref Values		117	163	41	165b
Element	Concent,	(2-sigma)	Nist-612a	Nist-612c	Nist-612d	Nist-612e	Nist-612f	Nist-612a	Nist-612b	Nist-612d	Nist-612e	Nist-612a	Nist-612b	Nist-612c	Nist-612d	Nist-612a	Nist-612b	Nist-612c	Nist-612d	n=17	2SD			Conc.	(2-sigma)	BIR-1a	BIR-1b	BIR-1a	BIR-1b	BIR-1c	Bir-1a	BIR-1b	BIR-1a	BIR-1b	BIR-1a	BIR-1b	BIR-1c	BIR-2a	BIR-1b	BIR-1d	n=15	2SD		Concent.	(2-sigma)	bcr-2a	bcr1	bcr-2a	bcr-2a
Li7	40.2	1.3	43.03	40.18	39.74	38.45	37.08	42.52	40.9	41.05	43.87	49.53	49.88	45.16	46.53	48.74	49.34	43.98	42.16	43.6553	8.03338			3.203	0.069	3.08	3.08	3.5	2.97	3.38	3.37	3	3.07	3.6	3.08	3.2	2.63	3.64	3.69	3	3.21933	0.599355		9.13	0.22	11.93	12.01	9.28	11.1
P31	46.6	6.9	55.9	47.45	55.01	50.27	52.35	53.84	51.17	51.28	53.41	54.2	52.36	57.47	64.43	61.06	59.66	60.82	54.42	55.0059	8.87231			130.92	18.7652	91.32	99.69	99.78	100.84	103.92	97.74	97.77	106.06	114.4	107.73	107.95	109.92	118.56	119.75	110.67	105.74	16.2239		1567.99	41.458	1528.19	1556.79	1671.11	1723.54
Sc45	39.9	2.5	47.44	48.02	49.34	47.82	48.33	49.66	47.3	46.84	47.85	38.58	38.64	36.81	37.58	39.06	36.42	37.6	38.13	43.26	10.6613			43.21	0.59	42.63	43.2	42.5	35.64	35.66	37.21	38.25	38.86	38.54	37.7	39.35	38.97	38.01	36.47	38.69	38.7787	4.72276		33.53	0.4	32.87	27.88	31.61	36.81
Ti49	44	2.3	39.16	38.07	40.21	37.59	41.57	40.66	39.53	37.81	39.76	43.64	42.94	41.87	39.93	42.81	38.88	41.02	40.26	40.3359	3.60532			5745.49	63.2742	5613.69	5751.95	5718.48	5797.49	5754.55	5679.78	5659.43	5758.16	5869.41	5858.67	5962.49	6007.75	5699.32	5671.76	5669.36	5764.82	229.663		5745.49	63.2742	15126.8	11935.8	12221.3	13286.7
V51	38.8	1.2	38.84	37.7	35.99	37.43	37.61	39.84	38.82	36.96	36.96	41.38	42.2	42.87	43.05	44.52	43.18	41.07	40.15	39.9159	5.26326			320.6	2.9	312.33	316.04	318.72	333.77	341.6	328.68	318.45	318.13	325.79	320.92	327.32	329.94	318.47	320.94	314.69	323.053	15.9639		417.6	4.5	437.46	398.42	446.08	424.05
Cr52	36.4	1.5	40.28	38.4	39.79	40.87	41.45	40.18	40.83	39.55	38.97	43.09	44.8	45.72	43.8	48.6	40.99	43.92	44.87	42.1241	5.5811			392.9	3.9	389.27	427.25	394.59	423.08	421.54	410.66	403.06	397.55	408.8	399.76	407.44	409.92	404.57	398.45	396.27	406.147	22.131		15.85	0.38	15.16	17.33	17.4	18.86
Mn55	38.7	0.9	38.33	37.64	37.05	37.16	37.43	38.57	38.21	37.9	37.82	40.9	39.95	42.52	41.69	42.91	41.65	40.31	40.19	39.4253	3.93287			1340.66	12.392	1355.42	1373.8	1368.63	1423.65	1417.65	1387.39	1363.87	1340.45	1378.35	1358.25	1384.75	1393.23	1365.51	1334.88	1348.7	1372.97	51.0769		1522.67	23.235	1714.68	1696.62	1463.81	1583.81
Co59	35.5	1	35.45	34.28	33.07	33.55	33.82	35.73	35.21	33.25	33.67	37.84	38.5	38.06	37.91	40.03	38.52	37.42	36.68	36.0582	4.43928			52.22	0.57	52.09	52.46	53.33	55.77	55.01	54.17	52.6	52	53.19	53.7	55.14	54.54	52.49	51.36	52.46	53.354	2.63544		37.33	0.37	41.43	42.85	37.92	38.29
Ni60	38.8	0.2	38.26	36.45	35.73	36.18	36.97	36.39	37.15	36.75	36.15	41.63	41.6	41.08	40.92	44.27	42.33	42.64	39.39	39.0524	5.63787			168.9	1.9	165.65	165.51	170.73	182.96	178.68	175.48	173.85	166.03	176.37	171.61	173.45	174.86	176.76	170.64	171.17	172.917	9.88645		12.57	0.3	23.96	20.63	14.79	14.06
Cu65	37.8	1.5	38.71	38.51	38.24	38.96	38.49	39.69	37.51	38.03	38.07	43.06	43.42	42.4	41.41	46.13	46.68	43.62	40.47	40.7882	5.87401			120.7	1.6	121.47	121.27	127.83	138.69	134.7	136.24	131.77	123.86	129.54	125.29	127.08	127.05	139.82	129.98	134.58	129.945	11.8086
Zn66	39.1	1.7	35	34.18	31.98	32.6	33	35.34	34.53	31.78	32.47	39.94	40.34	40.49	41.23	41.13	41.56	38.86	37.5	36.5841	7.37615			70.4	1.1	65.69	66.85	69.94	74.38	75.15	76.16	73.11	74.3	74.44	72.61	71.08	78.54	73.42	76.23	73.34	73.016	6.89019		129.5	1.8	138.35	145.85	146.94	153.46
Ga71	36.9	1.5	37.96	36.68	36.33	36.99	36.41	37.91	36.07	36.05	35.91	40.25	41.5	42.72	42.52	44.32	43.11	40.05	39.3	39.0635	5.7603			15.46	0.23	15.62	15.28	16.08	17.12	16.89	16.77	16.41	15.7	16.56	15.99	16.5	16.15	16.66	16.73	16.96	16.3613	1.08029
Sr88	78.4	0.2	77.07	77.02	78.09	77.76	78.52	79.71	78.32	77.76	78.09	80.15	78.73	77.54	80.04	85.35	81.35	78.74	77.93	78.9512	4.0373			108.6	0.7	106.4	106.8	108.97	108.83	105.56	107.59	103.05	107.71	108.92	110.04	111.76	110.07	110.17	107.94	108.47	108.152	4.28804		337.4	6.7	346.61	305.09	303.43	354.61
Y89	38.3	1.4	54.18	53.86	55.71	55.46	56.48	55.09	55.55	54.67	55.54	37.29	36.68	37.18	37.88	38.11	37.59	37.72	38.57	46.9153	18.1057			15.6	0.17	14.28	13.97	14.31	10.93	10.86	11.78	12.04	11.4	11.55	11.34	11.18	11.75	11.95	11.53	11.51	12.0253	2.33586		36.07	0.37	34.99	28.33	33.73	35.83
Zr90	37.9	1.2	49.42	49.41	51.13	49.98	51.86	49.98	50.29	49.65	51.12	35.88	35.3	35.47	36.48	37.09	35.7	35.1	37.15	43.5888	14.7969			14.8	0.22	12.96	13.41	13.36	10.8	10.25	10.78	10.61	10.78	11.24	11.3	11.05	11.07	11.17	10.95	11.13	11.3907	1.99891		186.5	1.5	173.2	157.61	163.94	182.47
Nb93	38.9	2.1	37.75	37.69	38.44	38.12	39.28	39.06	40.05	38.16	38.05	39.2	39.67	40.55	42.53	42.63	40.92	39.33	39.44	39.4629	3.00141			0.553	0.014	0.496	0.528	0.54	0.548	0.569	0.555	0.508	0.526	0.571	0.559	0.562	0.566	0.561	0.506	0.55	0.543	0.0492051		12.44	0.2	14.45	11.17	8.12	11.92
La139	36	0.7	37.75	38.48	39.08	38.09	38.8	37.98	38.92	37.76	39.14	34.63	35.22	33.76	34.5	36.48	34.61	35.37	35.96	36.8547	3.74855			0.627	0.012	0.494	0.574	0.595	0.508	0.539	0.532	0.59	0.554	0.557	0.562	0.566	0.583	0.556	0.544	0.543	0.553133	0.0562488		25.08	0.16	26.27	22.34	24.18	21.82
Ce140	38.4	0.7	38.3	38.27	37.19	37.75	37.81	37.75	39.04	37.18	37.78	41.38	41.92	41.43	42.66	42.78	42.11	42.4	41.14	39.8171	4.3556			1.92	0.023	1.93	1.91	2	1.99	2.03	1.98	1.87	2.02	1.99	1.98	1.97	1.92	2.02	1.926	1.917	1.96353	0.0960918		53.12	0.33	50.03	58.02	58.67	50.73
Pr141	37.9	1	38.78	39.56	39.57	39.04	39.47	39.26	40.04	38.72	39.72	39.81	40.17	39.5	39.51	40.65	39.72	39.27	38.87	39.5094	1.01362			0.3723	0.0047	0.367	0.411	0.372	0.354	0.414	0.415	0.354	0.33	0.386	0.356	0.434	0.366	0.374	0.402	0.36	0.379667	0.0587229		6.827	0.044	7.01	7.05	6.22	6.74
Nd143	35.5	0.7	37.68	38.32	38.45	38.98	37.84	38.06	38.22	36.9	38.61	36.09	34.18	35.38	34.51	36.3	34.63	34.61	36.27	36.7665	3.28547			2.397	0.043	2.36	2.24	2.53	2.05	2.22	2.34	2.16	2.06	2.3	2.5	2.04	2.31	2.44	2.28	2.04	2.258	0.328042		28.26	0.37	27.99	25.11	24.99	28.83
Sm147	37.7	0.8	40.66	41.99	43.28	42.31	42.66	41.08	42.7	42.24	44.02	37.13	37.37	37.74	36.41	35.8	34.46	35.52	36.76	39.5371	6.4344			1.113	0.018	1.03	0.95	1	1.06	0.92	0.97	1	0.925	0.978	0.95	1.11	1.1	0.788	0.95	1.06	0.986067	0.163131		6.547	0.047	6.6	5.77	5.87	6.19
Eu151	35.6	0.8	36.4	37.47	36.19	34.97	34.17	36.97	37.49	38.34	39.38	38.91	37.14	35.32	35.15	36.47	36.72	35.18	35.15	36.5541	2.94512			0.5201	0.0047	0.459	0.481	0.606	0.516	0.481	0.543	0.529	0.51	0.458	0.54	0.577	0.585	0.566	0.515	0.473	0.5226	0.0938869		1.989	0.024	2.29	1.71	2.03	1.77
Gd155	37.3	0.9	45.05	44.37	45.34	45.86	44.96	43.33	43.35	46.56	47.18	34.96	35	33.41	32.99	34.01	32.82	36.81	37.87	40.2276	11.1039			1.809	0.021	1.32	1.39	1.45	1.39	1.12	1.36	1.26	1.27	1.53	1.6	1.55	1.28	1.5	1.18	1.55	1.38333	0.290877		6.811	0.078	6.91	5.79	6.51	5.3
Tb159	37.6	1.1	48	49.02	47.15	46.14	46.42	46.43	46.33	50.27	52.69	36.66	36.2	35.35	35.04	34.77	33.69	35.86	36.79	42.1653	13.3234			0.3623	0.005	0.284	0.333	0.372	0.298	0.233	0.265	0.261	0.255	0.248	0.301	0.302	0.284	0.271	0.285	0.253	0.283	0.0711096		1.077	0.026	1.16	0.867	1.09	1.25
Dy163	35.5	0.7	44.74	44.99	51.46	50.55	50.01	45.25	44.03	45.79	48.55	34.42	35.06	32.43	31.62	33.5	31.24	33.72	35.16	40.7365	14.9694			2.544	0.028	2.25	2.68	2.4	2.05	1.94	1.7	2.02	2.03	1.96	1.9	1.99	1.97	2.14	2.07	1.93	2.06867	0.464011		6.424	0.055	5.38	5.52	5.42	6.52
Ho165	38.3	0.8	50.27	51.34	54.32	53.02	53.17	51.51	50.65	50.23	51.48	35.9	35.38	36.43	36.03	36.73	35.39	36.09	37.07	44.4124	16.2477			0.5718	0.0047	0.513	0.502	0.487	0.391	0.421	0.453	0.429	0.413	0.445	0.416	0.408	0.466	0.419	0.426	0.425	0.440933	0.0723344		1.313	0.011	1.2	1.14	1	1.19
Er166	38	0.9	51.16	51.78	53.75	53.48	54.25	52.91	51.91	50.67	52.13	37.05	36.32	34.21	34.96	34.96	34.85	34.95	38.23	44.5629	17.4244			1.68	0.015	1.34	1.68	1.67	1.32	1.18	1.23	1.45	1.29	1.36	1.3	1.16	1.3	1.44	1.27	1.3	1.35267	0.305798		3.67	0.038	4.5	2.99	3.44	3.12
Tm169	36.8	0.6	51.03	51.09	55.94	54.53	55.71	52.14	52.3	53.34	54.23	38.52	37.66	37.4	37.31	39.17	37.3	36.33	39.08	46.0635	16.2381			0.2558	0.004	0.232	0.242	0.25	0.181	0.184	0.237	0.196	0.184	0.2	0.18	0.208	0.198	0.23	0.218	0.2	0.209333	0.0476035		0.5341	0.006	0.43	0.394	0.57	0.48
Yb173	39.2	0.9	49.25	49.06	49.7	47.56	49.35	53.36	52.13	47.03	47.26	37.87	35.63	35.27	37.64	36.12	35.08	34.91	36.72	43.1729	14.0572			1.631	0.015	1.51	1.69	1.57	1.32	1.13	1.24	1.32	1.3	1.32	1.59	1.23	1.31	1.41	1.3	1.42	1.37733	0.306451		3.392	0.036	3.06	3.14	2.71	3.13
Lu175	37	0.9	52.28	51.92	53.94	52.54	52.15	51.65	50.9	48.98	49.38	39.2	37.07	33.23	34.02	33.44	33.04	36.42	38.21	44.0218	16.8715			0.2484	0.0032	0.238	0.246	0.249	0.181	0.167	0.166	0.2	0.183	0.174	0.162	0.183	0.174	0.193	0.141	0.165	0.188133	0.0645506		0.5049	0.0078	0.41	0.51	0.435	0.391
Hf179	36.7	1.2	51.37	51.14	50.6	48.88	47.69	47.6	45.87	46.32	48.45	32.41	32.08	34.75	35.79	32.4	33.3	33.21	34.66	41.56	15.8809			0.5822	0.0088	0.6	0.6	0.57	0.4	0.379	0.431	0.418	0.373	0.417	0.327	0.404	0.303	0.446	0.489	0.291	0.429867	0.196349		4.972	0.034	4.4	3.75	4	4.12
Ta181	37.6	1.9	44.09	43.5	44.06	43.23	43.34	43.25	43	44.41	45.42	39.02	37.66	35.15	35.41	36.91	36.09	35.22	35.92	40.3341	7.88824			0.0414	0.002	0.0386	0.043	0.05	0.0366	0.0385	0.0365	0.0385	0.0197	0.0428	0.039	0.0336	0.0412	0.026	0.0468	0.0349	0.0377133	0.0150468		0.785	0.018	0.755	0.673	0.79	0.83
Pb208	38.57	0.2	34.35	34.23	33.15	33.41	33.52	34.72	34.49	30.21	30.99	43.09	42.64	39.25	41.29	39.05	38.55	39.23	39.97	36.5965	8.03483			3.037	0.049	2.82	2.97	2.79	3.16	3.23	3.29	3.32	3.16	3.28	2.98	3.02	3	3.19	3.34	3.3	3.12333	0.36282		10.59	0.17	4.29	7.07	7.99	7.47
Th232	37.79	0.08	44.82	44.57	45.58	44.79	45.88	45.3	45.42	43.22	44.22	34.77	33.83	34.6	35.64	36.36	35.7	34.08	35.72	40.2647	10.1971			0.0328	0.0015	0.0305	0.0301	0.0299	0.0144	0.0128	0.0259	0.0231	0.0182	0.0279	0.0291	0.0256	0.0179	0.0237	0.036	0.0271	0.0248133	0.0130351		5.828	0.05	6.65	4.65	4.95	5.42
U238	37.38	0.08	32.56	32.43	33.96	34.36	33.84	36.41	36.14	32.46	31.94	40.42	40.85	39.51	39.46	39.51	39.89	43.25	41.67	36.98	7.55787			0.01051	0.00041	0.0376	0.0152	0.0313	0.0196	0.0154	0.0126	0.0352	0.0237	0.0125	0.019	0.01	0.0153	0.0258	0.0215	0.0142	0.0205933	0.0171121		1.683	0.017	1.63	1.49	1.88	1.73
(Nist 612, BIR-1, BCR-2 preferred values: Jochum, K. P., Weis, U., Stoll, B., Kuzmin, D., Yang, Q., Raczek, I., Jacob, D. E., Stracke, A., Birbaum, K., Frick, D. A., Günther, D., Enzweiler, J., 2011.
Determination of reference values for NIST SRM 610–617 glasses following ISO guidelines. Geostandards and Geoanalytical Research, 35: 397-429.																								Uncertanties of individual points (1-sigma errors)																				Uncertanties of individual points (1-sigma errors)
Uncertanties of individual points (1-sigma errors)																										0.47	0.55	0.34	0.38	0.49	0.47	0.51	0.38	0.46	0.51	0.59	0.57	0.56	0.64	0.53						8.6	1.84	3.58	2.08
Element			Nist-612a	Nist-612c	Nist-612d	Nist-612e	Nist-612f	Nist-612a	Nist-612b	Nist-612d	Nist-612e	Nist-612a	Nist-612b	Nist-612c	Nist-612d	Nist-612a	Nist-612b	Nist-612c	Nist-612d							10.94	12.3	11.56	12.37	13.44	13.24	14.71	26.2	28.77	27.66	28.19	29.18	29.83	30.11	27.51						828.34	840.36	550.17	856.66
Li7			4.91	4.6	7.3	7.26	7.18	2.62	2.52	3.46	3.8	4.69	4.71	6.39	6.74	5.46	5.47	7.17	7.03							2.02	2.36	1.78	1.75	2.1	2.08	2.8	1.8	2.18	2.2	2.74	3.27	1.42	1.47	1.58						9.55	2.06	6.34	5.02
P31			6.56	5.68	7.06	6.55	6.85	6.37	6.02	6.07	6.34	6.65	6.47	8.02	9	8.61	8.14	9.73	8.92							218.73	249.01	200.58	289.91	348.7	212.57	244.18	235.98	285.17	267.14	311.59	365.12	209.39	227	233.9						2864.53	1232.06	2173.64	608.44
Sc45			1.98	2.01	2.94	2.93	3.02	1.89	1.8	2.32	2.43	1.68	1.69	2.38	2.49	1.95	1.81	3	3.13							12.67	14.41	12.1	15.06	18.42	11.6	12.43	15.18	19.3	14.98	17.47	20.39	14	16.26	16.75						50.94	28.77	95.94	50.49
Ti49			1.82	1.76	2.19	2.16	2.31	1.86	1.79	1.88	1.99	2.31	2.28	3.1	3.04	2.18	1.88	2.31	2.29							19.15	24.73	14.76	22.96	28.4	15.91	18.07	14.11	15.81	17.69	20.24	23.19	17.12	19.18	19.95						2.5	2.17	2.34	2.78
V51			1.47	1.43	1.78	1.9	1.94	1.44	1.4	1.66	1.69	1.68	1.72	2.57	2.64	1.56	1.51	1.69	1.67							57.62	66.84	51.35	97.45	125.13	50.4	56.45	45.54	50.54	67.9	80.51	95.16	57.6	64.66	68.61						347.14	254.03	238.48	56.39
Cr52			1.79	1.72	2.58	2.72	2.82	1.5	1.51	1.76	1.77	2.08	2.16	3.5	3.46	1.96	1.63	2.17	2.25							2.68	3.19	1.97	5.68	7.37	2.82	3.51	2.23	2.71	3.01	3.61	4.2	2.47	2.81	3.02						11.52	3.45	6.35	3.65
Mn55			1.49	1.47	1.98	2.03	2.09	1.37	1.36	1.7	1.73	2.31	2.26	4.28	4.33	1.54	1.48	1.78	1.8							7.85	9.05	6.42	17.63	22.7	8.06	9.83	8.86	11.87	8.28	9.49	10.99	6.54	6.69	6.76						8.08	4.65	3.74	3.57
Co59			1.59	1.55	2.23	2.32	2.4	1.26	1.24	1.39	1.43	3.08	3.14	5.83	6	1.9	1.82	2.71	2.72							5.72	6.57	6.18	12.01	15.24	5.16	5.54	7.42	10.1	6.98	8.28	9.77	5.82	6	6.37
Ni60			1.7	1.63	2.2	2.3	2.37	1.43	1.44	1.63	1.63	3.26	3.27	6.01	6.19	2.05	1.92	2.68	2.53							4.79	5.88	3.83	5.72	7.65	4.91	6.18	2.74	2.85	4.46	5.15	6.75	2.9	3.2	3.07						36.63	15.23	23.5	8.56
Cu65			1.69	1.68	2.31	2.42	2.43	1.77	1.67	2.38	2.45	3.06	3.1	5.51	5.55	1.85	1.82	2.01	1.89							0.99	1.17	0.6	1.26	1.62	0.88	1.08	0.82	1.06	0.9	1.09	1.25	0.78	0.9	0.94
Zn66			2.19	2.15	3.15	3.31	3.42	1.74	1.69	2.26	2.37	2.5	2.54	4.78	5.04	2.46	2.45	3.6	3.57							4.14	4.65	3.78	5.71	6.86	4.76	5.63	5.03	6.3	5.67	6.76	7.88	3.4	3.37	3.38						38.51	23.21	43.85	39.12
Ga71			1.98	1.93	3.09	3.24	3.27	1.26	1.2	1.31	1.32	2.37	2.46	4.66	4.79	2.05	1.99	2.79	2.81							0.81	0.95	0.66	0.55	0.66	0.51	0.63	0.76	1.01	0.63	0.74	0.92	0.45	0.47	0.48						3.87	2.43	7.77	7.37
Sr88			2.76	2.77	3.67	3.73	3.83	2.64	2.59	3.03	3.09	3.61	3.56	5.63	5.97	3.49	3.32	4.62	4.67							0.64	0.74	0.51	0.54	0.62	0.53	0.65	0.61	0.8	0.72	0.85	1.02	0.45	0.48	0.48						25.67	19.04	24.97	28.16
Y89			2.57	2.57	4.17	4.27	4.46	2.17	2.19	3.05	3.19	1.59	1.57	2.47	2.58	1.49	1.47	2.05	2.15							0.04	0.041	0.051	0.045	0.054	0.046	0.049	0.04	0.046	0.043	0.047	0.05	0.04	0.041	0.037						1.93	1	1.85	1.4
Zr90			2.01	2.02	2.95	2.96	3.13	1.63	1.64	1.65	1.7	1.53	1.51	2.31	2.44	1.6	1.53	2.25	2.45							0.038	0.043	0.041	0.035	0.042	0.036	0.044	0.033	0.035	0.038	0.042	0.047	0.036	0.039	0.036						2.81	1.84	4.4	3.16
Nb93			1.36	1.36	1.77	1.79	1.87	2.01	2.06	3.2	3.3	1.91	1.94	3.37	3.65	2.06	1.97	2.97	3.06							0.11	0.12	0.11	0.13	0.16	0.11	0.12	0.11	0.13	0.1	0.11	0.12	0.085	0.086	0.081						6.75	2.56	3.98	3.01
La139			1.52	1.56	2.28	2.28	2.37	1.3	1.33	1.59	1.68	1.5	1.53	2.29	2.4	1.45	1.38	2.04	2.12							0.029	0.032	0.03	0.033	0.046	0.038	0.041	0.025	0.032	0.027	0.035	0.033	0.027	0.031	0.026						1.58	0.65	0.73	0.89
Ce140			1.61	1.62	2.32	2.41	2.47	1.56	1.61	2.26	2.37	2.05	2.08	3.51	3.72	1.8	1.77	2.65	2.63							0.23	0.24	0.21	0.15	0.18	0.23	0.27	0.17	0.22	0.19	0.18	0.21	0.2	0.22	0.19						3.54	2.68	4.83	3.7
Pr141			1.62	1.66	2.47	2.5	2.59	1.6	1.63	2.33	2.47	2.5	2.53	4.5	4.64	2.58	2.52	4.34	4.43							0.14	0.14	0.14	0.11	0.11	0.17	0.23	0.087	0.094	0.1	0.13	0.14	0.092	0.11	0.11						0.6	0.66	1.25	0.96
Nd143			2.14	2.18	3.53	3.7	3.68	1.4	1.39	1.55	1.64	1.43	1.37	1.9	1.89	2.33	2.21	3.88	4.19							0.055	0.062	0.066	0.043	0.045	0.062	0.076	0.051	0.056	0.056	0.067	0.078	0.047	0.048	0.041						0.51	0.25	0.47	0.31
Sm147			2.63	2.74	4.84	4.89	5.07	2.6	2.71	4.82	5.23	1.88	1.89	3.16	3.14	4.29	4.14	8.25	8.83							0.19	0.21	0.19	0.14	0.13	0.19	0.23	0.15	0.2	0.22	0.25	0.24	0.16	0.15	0.17						0.88	0.9	1.65	1.63
Eu151			2.58	2.67	4.28	4.26	4.27	2.23	2.27	4.09	4.36	1.73	1.66	2.4	2.44	2.72	2.74	4.7	4.84							0.036	0.044	0.039	0.039	0.039	0.026	0.031	0.027	0.033	0.03	0.034	0.036	0.024	0.027	0.023						0.32	0.087	0.43	0.36
Gd155			3.22	3.2	5.72	5.98	6.03	2.36	2.37	4.46	4.71	1.68	1.69	2.42	2.45	2.84	2.74	6.18	6.6							0.19	0.24	0.37	0.14	0.15	0.16	0.23	0.15	0.18	0.17	0.2	0.24	0.17	0.2	0.19						1.58	0.54	1.35	1.02
Tb159			3.47	3.56	5.77	5.82	6.02	2.31	2.32	4.52	4.94	3.32	3.28	5.9	6.03	1.85	1.79	3.36	3.56							0.063	0.073	0.047	0.029	0.035	0.046	0.056	0.05	0.07	0.038	0.043	0.056	0.03	0.033	0.031						0.2	0.14	0.17	0.17
Dy163			2.09	2.13	3.98	4.04	4.12	4.82	4.73	9.75	10.8	1.55	1.58	2.16	2.16	2.04	1.9	3.76	4.06							0.22	0.34	0.13	0.14	0.16	0.19	0.3	0.16	0.22	0.13	0.13	0.17	0.13	0.13	0.13						0.52	0.5	0.74	0.93
Ho165			3.98	4.12	8.01	8.09	8.38	2.6	2.57	4.26	4.52	1.5	1.48	2.38	2.42	2.56	2.47	4.58	4.86							0.031	0.036	0.037	0.031	0.039	0.033	0.035	0.024	0.032	0.029	0.039	0.045	0.023	0.024	0.022						0.1	0.051	0.15	0.11
Er166			5.88	6.03	11.86	12.21	12.81	1.78	1.74	1.86	1.94	2.81	2.76	4.62	4.86	3.95	3.96	7.85	8.9							0.23	0.3	0.34	0.14	0.15	0.18	0.24	0.11	0.12	0.19	0.17	0.21	0.13	0.14	0.14						0.36	0.49	0.71	0.42
Tm169			3.57	3.63	7.35	7.42	7.84	4.3	4.34	8.43	8.94	4.43	4.35	8.24	8.49	3.59	3.43	6.11	6.78							0.036	0.042	0.037	0.02	0.021	0.034	0.057	0.019	0.021	0.022	0.029	0.032	0.02	0.019	0.019						0.17	0.094	0.076	0.044
Yb173			4.99	5.01	8.95	8.84	9.45	8.34	8.13	12.7	13.21	2.48	2.35	4.29	4.73	3.44	3.34	6.17	6.7							0.14	0.16	0.12	0.061	0.065	0.069	0.073	0.054	0.059	0.054	0.06	0.049	0.069	0.076	0.051						0.33	0.47	0.49	0.81
Lu175			4.76	4.77	8.87	8.92	9.13	4.49	4.44	7.69	8.05	2.27	2.15	3.13	3.29	4.77	4.74	10.93	11.92							0.0095	0.01	0.013	0.0075	0.0086	0.0085	0.0088	0.005	0.008	0.0074	0.0071	0.0076	0.0071	0.01	0.0074						0.089	0.094	0.26	0.17
Hf179			7.01	7.04	12.49	12.45	12.52	5.05	4.9	9.68	10.56	1.62	1.61	2.95	3.13	1.3	1.3	1.64	1.74							0.24	0.31	0.19	0.28	0.36	0.33	0.46	0.24	0.33	0.28	0.34	0.41	0.26	0.34	0.35						1.59	1.85	3.42	0.9
Ta181			2.58	2.56	4.31	4.35	4.49	4.65	4.66	9.44	10.08	2.51	2.43	3.84	3.98	1.93	1.89	3.05	3.21							0.01	0.0091	0.0096	0.0064	0.0059	0.0074	0.0084	0.0049	0.0071	0.0064	0.0063	0.0049	0.0067	0.0089	0.0063						2.04	0.55	0.87	0.68
Pb208			2.33	2.33	3.82	3.97	4.09	1.88	1.86	2.54	2.69	3.02	2.99	4.83	5.23	3.16	3.13	5.94	6.26							0.0086	0.0052	0.0079	0.0047	0.0052	0.0054	0.0097	0.0051	0.004	0.0046	0.0036	0.004	0.0067	0.0066	0.0046						0.3	0.2	0.37	0.24
Th232			4.4	4.43	8.33	8.46	8.95	2.69	2.7	4.38	4.64	1.25	1.21	1.67	1.75	2.39	2.35	3.91	4.23
U238			3.11	3.14	6.11	6.4	6.51	2.64	2.61	3.82	3.88	1.87	1.89	2.91	2.98	3.81	3.86	8.16	8.14					Minimum detection limits (99% confidence).																				Minimum detection limits (99% confidence).
																										BIR-1a	BIR-1b	BIR-1a	BIR-1b	BIR-1c	Bir-1a	BIR-1b	BIR-1a	BIR-1b	BIR-1a	BIR-1b	BIR-1c	BIR-2a	BIR-1b	BIR-1d						bcr-2a	bcr1	bcr-2a	bcr-2a
Minimum detection limits (99% confidence).																										0.132	0.156	0.152	0.159	0.105	0.0824	0.115	0.236	0.168	0.266	0.182	0.184	0.372	0.331	0.262						0.232	0.437	0.235	0.206
Element			Nist-612a	Nist-612c	Nist-612d	Nist-612e	Nist-612f	Nist-612a	Nist-612b	Nist-612d	Nist-612e	Nist-612a	Nist-612b	Nist-612c	Nist-612d	Nist-612a	Nist-612b	Nist-612c	Nist-612d							5.1	5.73	5.79	5.9	5.18	5.65	5.87	8.22	7.74	8.35	8.31	6.7	10.64	12.33	7.57						42.77	41.58	22.73	26.94
Li7			0.1	0.105	0.0737	0.0605	0.111	0.0812	0.0932	0.065	0.112	0.122	0.117	0.118	0.082	0.19	<0.00000	0.0555	0.096							0.158	0.172	0.157	0.137	0.118	0.146	0.141	0.127	0.108	0.117	0.101	0.0958	0.166	0.198	0.103						0.506	0.421	0.33	0.311
P31			3.64	3.87	4.02	3.26	4.18	3.85	3.58	3.58	3.89	4.84	4.9	5.7	5.8	7.69	5.8	5.49	5.83							0.428	0.567	0.604	0.441	0.512	0.364	0.446	0.702	1.04	0.364	0.456	0.35	0.657	1.17	0.516						1.26	1.98	0.564	1.05
Sc45			0.109	0.12	0.122	0.0998	0.119	0.104	0.11	0.112	0.119	0.121	0.119	0.127	0.139	0.183	0.143	0.148	0.143							0.0391	0.0366	0.054	0.0564	0.0498	0.0406	0.0374	0.048	0.0621	0.0534	0.0467	0.0458	0.0782	0.0958	0.0604						0.144	0.139	0.103	0.0775
Ti49			0.342	0.244	0.372	0.236	0.28	0.121	0.424	0.303	0.341	0.328	0.374	0.472	0.56	0.607	0.363	0.537	0.54							0.923	1.04	1.21	1.21	1.06	1.17	1.18	0.848	0.832	0.89	0.838	0.713	1.12	1.28	0.805						2.63	2.35	1.93	1.57
V51			0.0321	0.0334	0.0308	0.0282	0.0371	0.0335	0.0331	0.0253	0.038	0.0551	0.0514	0.0489	0.0484	0.0739	0.0513	0.0526	0.0378							0.225	0.253	0.257	0.242	0.21	0.26	0.258	0.146	0.171	0.146	0.153	0.134	0.193	0.23	0.127						1.09	0.954	0.533	0.67
Cr52			0.683	0.711	0.753	0.597	0.769	0.778	0.745	0.755	0.815	1.08	1.04	1.16	1.19	1.55	1.16	1.14	1.16							0.0172	0.0104	0.0246	0.0168	0.013	0.0174	<0.00000	0.0125	0.0318	<0.00000	0.0183	0.0219	0.0317	0.024	0.0183						<0.00000	0.0627	0.0708	0.03
Mn55			0.165	0.172	0.191	0.146	0.184	0.177	0.164	0.165	0.18	0.177	0.191	0.24	0.259	0.341	0.246	0.256	0.264							0.112	0.0513	<0.00000	0.085	0.0813	0.0721	0.134	0.0612	0.145	0.128	0.087	0.0906	0.0977	0.165	0.115						5.54	2.99	1.73	4.27
Co59			0.0113	<0.00000	0.0158	0.014	0.0113	0.011	<0.00000	0.00801	<0.00000	0.00948	0.0129	0.0185	0.0183	0.0274	0.0142	0.0104	0.0105							0.0789	0.105	0.072	0.0745	0.058	0.0906	0.0969	0.116	0.102	0.0763	0.0523	0.0633	0.0862	0.161	0.0448
Ni60			0.032	0.0479	0.0675	0.0586	0.0683	0.0538	0.0522	0.0397	0.0447	<0.00000	<0.00000	0.0773	0.0937	0.119	0.0505	0.0539	0.0542							0.172	0.204	0.173	0.229	0.218	0.225	0.231	0.315	0.232	0.247	0.215	0.219	0.354	0.443	0.258						0.752	0.56	0.552	0.278
Cu65			0.0534	0.049	0.0326	0.038	0.0467	<0.00000	0.054	0.0665	0.0648	0.0417	<0.00000	0.126	<0.00000	0.122	0.0634	0.0956	0.0962							0.0371	0.0142	0.0166	0.0551	0.0238	0.0329	0.038	0.0355	0.034	0.0337	0.023	0.0278	0.018	0.0307	0.0303
Zn66			0.119	0.118	0.118	0.098	0.127	0.138	0.118	0.167	0.142	0.28	0.242	0.21	0.177	0.259	0.263	0.18	0.239							0.00733	0.00893	0.0145	0.00691	0.00534	0.0117	0.0122	0.00788	0.0264	0.00473	0.00914	0.0156	0.00748	0.0154	<0.00000						0.026	0.0267	0.0172	0.0112
Ga71			0.0199	<0.00000	0.0242	0.0126	0.0155	0.0105	0.027	0.0265	0.0322	0.0271	0.0227	0.0322	0.0391	0.0201	<0.00000	0.0264	0.0216							0.014	0.014	0.0113	0.00791	0.00613	0.0067	0.0101	0.00487	0.00661	<0.00000	<0.00000	<0.00000	0.00577	<0.00000	<0.00000						0.0317	0.0191	<0.00000	0.0217
Sr88			0.00555	0.00416	0.0048	0.0056	0.0109	<0.00000	0.00891	0.00943	0.0219	0.00781	0.00533	0.0107	0.0122	<0.00000	0.0102	0.0104	0.0085							0.0154	0.0265	<0.00000	0.0222	0.0122	0.0184	0.0141	<0.00000	0.021	0.0101	0.00986	0.012	0.0116	<0.00000	0.00849						0.0433	0.0392	0.0543	<0.00000
Y89			0.00612	<0.00000	0.0106	0.00715	0.00761	0.00708	0.0119	<0.00000	0.0145	0.00631	0.00609	<0.00000	0.0122	<0.00000	0.00938	0.00707	0.00711							0.00686	0.00838	<0.00000	0.0133	<0.00000	0.00775	0.0116	0.00649	0.00615	0.00667	0.00916	<0.00000	<0.00000	0.0177	0.00549						<0.00000	0.0303	<0.00000	0.0215
Zr90			0.0116	0.0123	0.0247	0.0136	0.025	0.0134	0.013	<0.00000	<0.00000	0.0176	0.012	0.0142	<0.00000	0.0174	<0.00000	0.0243	0.0315							0.00494	<0.00000	<0.00000	<0.00000	0.0066	0.00509	0.0055	0.00565	0.00374	<0.00000	0.00556	<0.00000	<0.00000	0.00561	0.00347						<0.00000	0.0254	<0.00000	<0.00000
Nb93			0.00731	<0.00000	0.00638	0.0086	0.00647	0.00618	0.012	<0.00000	0.0141	0.0104	0.0071	0.00858	0.0085	0.0149	0.0134	0.014	<0.00000							0.00742	0.00518	0.0105	<0.00000	0.00474	0.0101	0.00536	<0.00000	<0.00000	0.00414	0.00563	<0.00000	<0.00000	0.01	0.00506						<0.00000	0.0149	<0.00000	<0.00000
La139			0.00374	0.00396	0.00457	0.00308	0.00463	0.00433	0.00727	0.00452	0.00882	<0.00000	0.00662	<0.00000	<0.00000	<0.00000	<0.00000	0.00545	<0.00000							0.00652	0.00458	0.00745	0.00513	0.00397	<0.00000	<0.00000	0.00333	0.00317	0.00601	<0.00000	<0.00000	<0.00000	0.00476	0.00417						<0.00000	0.0122	0.00966	0.0174
Ce140			<0.00000	0.0049	0.00393	<0.00000	0.00397	<0.00000	0.00529	<0.00000	0.00987	0.00679	0.00656	0.00552	0.00772	0.0136	<0.00000	<0.00000	<0.00000							<0.00000	0.0604	<0.00000	<0.00000	<0.00000	0.0365	0.0397	0.0398	0.0378	0.0293	0.0398	<0.00000	<0.00000	<0.00000	<0.00000						0.0806	0.0731	<0.00000	<0.00000
Pr141			<0.00000	<0.00000	0.00349	<0.00000	<0.00000	0.00332	0.00456	0.00688	0.00866	<0.00000	0.00395	0.0046	0.00789	0.00993	0.0042	0.0063	0.00448							0.0315	0.0384	0.062	0.055	<0.00000	<0.00000	<0.00000	<0.00000	0.022	0.024	0.0238	0.0208	<0.00000	0.0338	0.0209						0.159	0.0986	0.105	0.0681
Nd143			<0.00000	<0.00000	0.0647	0.0218	0.0327	<0.00000	0.0296	0.0538	0.0494	<0.00000	0.0483	0.0405	<0.00000	<0.00000	0.0357	0.0393	0.0396							0.00862	<0.00000	0.0216	0.0168	0.009	0.017	0.0182	0.0103	0.00689	<0.00000	<0.00000	0.00612	0.00891	<0.00000	<0.00000						<0.00000	0.0269	0.0235	<0.00000
Sm147			0.0336	0.0252	<0.00000	0.0279	0.042	0.0468	0.0371	0.0293	0.0573	<0.00000	0.0515	<0.00000	0.0347	0.042	0.0308	<0.00000	0.0487							<0.00000	<0.00000	<0.00000	0.0503	0.0541	<0.00000	<0.00000	0.0302	0.0289	<0.00000	<0.00000	0.0436	<0.00000	<0.00000	0.0279						0.206	0.121	<0.00000	0.0859
Eu151			0.00677	0.00712	<0.00000	<0.00000	<0.00000	0.0135	0.017	0.0142	0.0185	0.00974	0.00937	0.0103	<0.00000	0.0187	0.00969	<0.00000	0.0104							0.0106	<0.00000	0.00868	0.00676	0.00893	0.00546	0.00604	0.0038	0.00368	0.00399	<0.00000	<0.00000	0.00482	0.00561	0.00346						0.0195	0.0157	<0.00000	<0.00000
Gd155			<0.00000	0.0357	<0.00000	<0.00000	0.0424	<0.00000	0.0514	0.0605	0.084	0.058	0.0558	0.0439	<0.00000	0.0534	<0.00000	<0.00000	0.0689							0.0353	0.0313	0.0338	0.0264	0.0199	<0.00000	0.0243	<0.00000	0.0141	<0.00000	0.0147	0.0127	0.0183	<0.00000	0.0134						0.164	0.148	<0.00000	<0.00000
Tb159			0.00678	0.00505	0.00781	0.00642	0.00964	0.00516	0.00713	0.00603	0.0119	0.00778	0.00918	<0.00000	<0.00000	0.00715	0.00526	0.00852	<0.00000							0.0114	0.00814	0.00894	<0.00000	0.00928	<0.00000	<0.00000	0.00657	<0.00000	<0.00000	<0.00000	0.00323	0.0047	0.00554	<0.00000						0.0195	0.0344	0.0219	<0.00000
Dy163			0.018	<0.00000	<0.00000	0.0232	0.0351	<0.00000	<0.00000	0.0324	0.0517	0.0217	<0.00000	0.0228	0.0318	<0.00000	0.0207	0.0243	<0.00000							<0.00000	0.0342	0.0271	0.0287	<0.00000	0.0241	0.0266	0.0113	<0.00000	0.0166	<0.00000	<0.00000	<0.00000	<0.00000	0.0106						0.0865	0.0738	0.0466	0.0523
Ho165			<0.00000	<0.00000	0.00624	0.00595	<0.00000	0.00558	0.00542	<0.00000	0.0115	0.00541	<0.00000	0.00624	0.00874	<0.00000	0.00985	0.00881	0.00888							0.00645	0.0114	<0.00000	0.00993	0.00763	<0.00000	0.00897	<0.00000	<0.00000	<0.00000	<0.00000	0.00456	0.00666	<0.00000	<0.00000						<0.00000	0.015	<0.00000	0.0199
Er166			0.0413	0.022	0.0185	0.0279	0.0326	<0.00000	0.0165	<0.00000	0.0282	0.0166	0.016	<0.00000	0.0247	<0.00000	<0.00000	0.0187	0.0189							<0.00000	0.0418	0.0844	<0.00000	<0.00000	0.0322	0.0347	<0.00000	<0.00000	<0.00000	<0.00000	<0.00000	0.0272	<0.00000	0.0202						<0.00000	0.0713	<0.00000	<0.00000
Tm169			<0.00000	0.00711	0.0062	<0.00000	0.00632	0.00554	0.012	0.00601	0.00679	0.00565	<0.00000	0.00881	<0.00000	0.00804	0.00589	<0.00000	0.00629							<0.00000	<0.00000	<0.00000	0.00673	0.00709	<0.00000	0.00889	0.00369	0.00352	0.00533	0.00372	0.00324	0.00465	0.00757	<0.00000						<0.00000	<0.00000	<0.00000	0.0232
Yb173			<0.00000	0.0282	<0.00000	<0.00000	0.045	0.0327	<0.00000	<0.00000	0.0475	<0.00000	0.029	0.035	<0.00000	0.075	0.0318	<0.00000	0.0598							<0.00000	<0.00000	<0.00000	<0.00000	<0.00000	<0.00000	0.0399	<0.00000	<0.00000	0.0361	0.025	0.0216	0.0434	<0.00000	0.0318						0.11	0.0943	0.0711	0.041
Lu175			0.00692	0.00518	0.00592	0.00563	0.00598	0.011	0.00532	0.00779	0.0152	0.00567	<0.00000	0.00806	<0.00000	0.0101	0.0105	<0.00000	0.0064							<0.00000	0.00692	0.00806	<0.00000	0.00524	0.00576	<0.00000	<0.00000	0.00401	<0.00000	0.00431	0.00375	0.00538	<0.00000	<0.00000						0.0283	0.0233	<0.00000	0.0118
Hf179			0.0561	0.0342	<0.00000	0.0255	0.0384	0.0334	<0.00000	<0.00000	0.0415	<0.00000	<0.00000	0.0562	0.0557	0.0481	0.0353	<0.00000	0.04							0.01	0.017	0.0158	0.0193	0.0126	0.0158	0.0122	0.0132	0.00903	0.0133	0.018	0.0162	0.0256	0.0281	0.0194						0.0323	0.0282	<0.00000	0.0242
Ta181			<0.00000	0.00464	0.00524	0.00352	0.00918	0.00858	0.00964	0.00764	0.00863	0.00818	0.00787	0.00598	0.00834	<0.00000	<0.00000	0.0086	0.00612							0.00862	<0.00000	0.00844	0.012	0.00941	0.00601	0.0111	<0.00000	0.00689	<0.00000	0.00407	0.00345	0.00522	0.00616	<0.00000						0.0262	0.0146	<0.00000	<0.00000
Pb208			0.00631	0.00471	0.00909	0.00705	0.0106	0.00916	0.00883	0.0109	0.0134	0.0158	0.0201	0.0167	0.0202	<0.00000	0.0155	0.00852	0.0149							0.00357	0.00438	0.0053	<0.00000	0.00626	0.00693	0.0054	<0.00000	0.00342	<0.00000	0.00334	0.00279	<0.00000	<0.00000	<0.00000						0.0206	0.013	<0.00000	0.00933
Th232			<0.00000	0.00486	<0.00000	0.00662	0.00998	0.00761	0.00903	<0.00000	0.0174	0.0109	<0.00000	<0.00000	0.00887	0.00815	<0.00000	0.0089	<0.00000
U238			0.00377	<0.00000	0.00474	0.00598	0.0034	<0.00000	0.00487	0.00325	0.0063	0.00471	0.00454	0.0072	0.00711	<0.00000	0.0067	<0.00000	0.0094
[truncated: 4 more columns]

## Sheet: SC3. CPX -PN composition
Composition of clinopyroxes from PN massif
All values are reported in ppm
Trace Element Concentrations (MDL filtered).
Run	1	1	1	1	1	1	1		2	2	2	2	2	2	2		3	3	3	3	3	3	3	3		4	4	4	4		5	5	5	5	5		6	6	6	6	6	6	6	6	6	6	6	6	6
Sample	117	117	117	117	117	117	117		117	117	117	117	117	117	117		163	163	163	163	163	163	163	163		163	163	163	163		41	41	41	41	41		41	41	41	41	41	41	41	41	41	41	41	41	41
Element	cpx-1b	cpx-2	cpx-6	cpx-7	cpx-10	cpx-11	cpx-13a		cpx1-bd_ext	cpx1-bd_final	cpx2-sbc1	cpx2-sbc2	cpx3-sbc1	cpx3-sbc2	cpx3-znfinaint		cpx-4	cpx-5	cpx-6	cpx-7	cpx-10	cpx-11	cpx-12	cpx-9a		cpx2bd	cpx4bd	cpx1bd	cpx1bd_ext		cpx-1	cpx-1-3	cpx-2	cpx-3	cpx-7		cpx2-bdext	cpx2-bdinterm	cpx2-bdextern	cpx2-bdfinal	cpx7-bdint1	cpx7-bdintm2	cpx7-bdext1	cpx7-bdext2fn	cpx1-zn1-int	cpx1-zn2-intm	cpx1-zn3-intm-esc	cpx1-zn4-intm-clar	cpx1-zn5-bdesc
mg#	0.8846	0.88	0.8487	0.8515	0.8924	0.883	0.874		0.816652	0.814408	0.7896	0.775946	0.837328	0.797672	0.882951		0.860633	0.889215	0.875827	0.864824	0.886	0.891	0.884858	0.885		0.787548	0.748049	0.787548	0.745682		0.893	0.891	0.898	0.892	0.853		0.809	0.765	0.764	0.791	0.793	0.814	0.774	0.772	0.774	0.809	0.769	0.813	0.768
Li7	4.52	3.43	2.66	2.49	3.44	2.12	3.76		2.44	2.1	7.12	4.88	5.09	2.04	2.62		11.55	3.98	9.58	8.05	6.35	4.82	8.11	11.17		9.6	10.55	11	9.57		6.13	3.69	2.37	3.13	2.17		6.96	7	6.59	5.91	4.43	6.16	4.2	6.81	6.37	6.21	8.09	8.46	6.51
P31	18.5	16.06	24.79	34.17	22.91	24.39	15.18		59.4	57.98	56.83	47.06	72.66		64.78		19.85	26.82	15.89	20.7	16.37	17.64	13.91	17.45		111.24	82.93	113.31	45.33		17.7	18.11	12.7	22.04	19.71		48.78	44.13	62.12		117.96	90.18	37.9	49	71.05	40.64	31.67	34.88	91.24
Sc45	69.73	72.51	84.61	83.7	57.68	64.83	75.84		82.37	98.74	79.8	63.66	73.82	62.22	77.56		58.14	69.47	54.52	66.2	80.44	80.36	81.6	77.34		50.16	47.12	61.09	47.29		46.2	46.7	62.7	50.05	78.89		71.97	57.2	37.78	38.2	70.05	65.96	40.21	31.09	51.13	81.44	61.45	64.89	42.87
Ti49	4072.58	4133.99	5339.35	6552.77	3909.96	4176.25	3841.05		11287.5	19016	13548	18810.8	10923.5	15526.3	15656.1		3992.32	5952.15	3409.14	5400.88	5146.99	4764.51	4978.07	4757.07		10810.3	10907.5	14713.1	8470.59		3291.37	3572.79	3962.25	3766.1	6091.58		14255.8	9728.17	15860.5	9883.27	13779.7	10382.3	16629.8	11621.4	13503.7	10735.4	11536.3	9461.21	15546.4
V51	132.33	117.85	175.37	203.08	115.91	132.92	107.7		351.68	365.76	349.18	393.32	371.14	320.4	340.05		140.5	185.04	113.89	174.32	137.21	131.88	136.93	131.14		478.27	504.28	536.95	389.58		139.8	135.34	119.6	152.45	187.74		499.18	429.12	499.48	350.32	495.42	392	504.31	382.09	418.94	443.48	544.29	401.98	483.47
Cr52	8256.67	7671.52	1016.7	1167.36	7534.34	4826.32	6197.33		1407.07	814.09	2105.22	921.03	1938.79	677.11	1488.78		8052.47	3524.92	6863.15	5534.26	6768.1	4511.96	3463.6	6744.68		31.88	38.1	107.59	40.96		5990.79	9309.54	3991.42	4022.3	1932.44		2311.28	1529.85	53.51	74.21	1875.53	976.33	121.64	79.46	82.06	1665.01	1441.66	1550.32	53.87
Mn55	640.95	594.37	781.96	779.64	586.23	689.49	561.6		1042.43	1037.02	845.57	877.45	1052.5	1051.84	884.04		645.95	710.51	618.92	672.24	590.4	600.63	591.6	610.09		1308.14	1507.64	1119.33	1299.77		658.46	667.62	563.56	659.42	699.64		893.65	931.85	1241.58	1099.69	931.04	944.23	1083.22	1101.29	1023.87	1007.75	1023.9	909.19	984.42
Co59	30.84	28.81	37.73	38.2	29.45	32.54	27.07		43.57	40.91	39.79	38.65	48.26	40.5	44.19		31.76	33.42	32.77	33.06	29.44	29.7	29.09	30.12		44.94	44.65	41.15	34.78		32.28	31.09	30.11	33.82	37.19		42.96	44.97	41.84	40.68	43.48	43.81	42.01	36.7	44.08	49.23	46.78	41.55	39.24
Ni60	272.53	248.65	226.9	225.1	265.55	244.34	231.3		194.67	236.86	188.67	197.28	275.93	176.54	253.82		263.44	254.61	279.51	247.54	246.8	236.17	214.33	251.04		169.07	153.26	181.23	121.15		303.87	302.23	266.67	288.99	236.9		222.92	216.29	156.81	142.26	183.68	211.03	183.04	161.37	155.56	226.22	186.78	201.65	208.95
Cu65	0.315	0.302	0.511	0.476	0.353	0.6	0.302										0.61	0.693	0.482	0.651	0.424	0.217	0.304	0.31							0.494	0.419	0.395	3.29	0.448
Zn66	17.87	16.04	24.42	24.12	16	20.05	15.46		39.99	43.42	41.54	38.35	40.76	40.26	38.91		17.52	20.72	16.51	19.08	16.11	15.53	14.59	15.98		46.94	64.55	43.16	63.64		19.24	19.74	17.38	20.94	22.63		40.94	41.33	60.38	63.81	39.49	39.23	50.1	56.63	58.03	44.95	44.34	42.67	51.91
Ga71	4.77	4.79	5.75	7.7	5.05	4.62	4.3										5.79	7.87	4.51	6.63	5.29	4.77	5.02	4.88							4.99	5.37	4.74	5.07	6.69
Sr88	84.23	81.27	95.73	102.86	92.14	80.99	75.46		127.97	159.26	130.4	156.62	122.49	151.05	141.76		87.34	108.98	100.8	101.81	92.62	88.83	85.65	84.97		145.7	157.81	115.53	117.27		77.34	86.05	88.9	88.38	94.35		140.37	136.21	186.15	106.18	136.39	128.37	162.2	133.04	155.83	129.08	128.25	120.94	166.42
Y89	8.5	8.76	8.89	9.99	5.51	6.59	7.88		16.71	23.81	15.53	21.59	14.18	21.71	19.17		5.61	8.52	4.29	6.77	8.61	7.48	8.24	7.75		25.41	37.39	19.85	62.12		4.44	4.95	5.69	4.18	6.76		20.46	15.14	34.92	82.31	18.55	15.33	25.96	62.16	20.34	13.51	15.34	15.16	27.25
Zr90	15.39	16.59	24.67	34.22	11.49	13.79	16.26		73.42	133.32	77.56	127.62	65.76	142.01	98.99		13.57	25.81	9.6	20.29	19.42	18.73	21.74	16.39		112.87	180.98	101.91	325.23		9.12	10.65	13.44	9.51	23.15		129.36	68.8	192.76	639.16	108.19	77.64	142.2	397.42	106.71	62.62	77.63	68.33	151.63
Nb93	0.108	0.089	0.167	0.291	0.059	0.112	0.107		0.95	2.23	0.83	1.21	0.42	2.38	0.81		0.103	0.15	0.08	0.109	0.072	0.092	0.12	0.11		0.719	1.28	0.766	1.63		0.058	0.063	0.1	0.077	0.165		0.87	0.298	1.71	4.47	0.91	0.533	1.45	3.44	0.69	0.259	0.48	0.45	1.01
La139	1.961	1.989	2.67	3.09	1.82	1.97	1.96		7.37	13.13	7.99	8.7	5.53	13.57	7.14		2.253	3.1	1.923	2.66	2.59	2.37	2.57	2.31		9.57	18.16	10.23	33.28		1.271	1.567	1.87	1.73	2.2		7.19	4.97	16.47	55.28	6.87	4.99	11.67	37.08	8.58	4.25	5.29	4.96	11.95
Ce140	5.76	5.82	9.65	10.93	6.09	6.92	5.28		22.76	38.39	24.42	31.55	19.18	42.77	23.56		7.54	11.55	6.43	9.63	7.41	7.13	7.45	6.92		37.36	72.55	41.4	127.44		5.4	5.93	6.38	6.59	8.58		29.85	19.86	66.04	200.23	29.98	20.37	46.39	149.53	35.71	19.91	25.15	20.77	49.14
Pr141	1.095	1.108	1.652	2.07	1.117	1.172	1.03		3.97	6.27	4.44	5.69	3.25	6.63	4.23		1.25	1.876	1.124	1.676	1.383	1.364	1.401	1.263		6.97	11.63	6.77	20.05		0.918	1.016	1.16	1.21	1.63		4.48	3.15	9.29	27.65	4.79	3.61	7.24	22.63	5.54	3.59	4.07	3.26	7.57
Nd143	6.4	6.66	10.43	10.72	5.65	6.39	6.48		17.02	29.55	18.84	27.69	15.7	28.82	21.96		6.41	9.81	5.29	8.92	8.67	7.08	7.35	7.31		28.55	58.36	29.11	86		4.94	5.59	6.23	5.62	8.44		25.72	16.46	47.52	107.85	26.67	17.2	34.84	106.37	27.15	17.51	21.56	16.24	35.06
Sm147	1.82	1.9	2.94	3.18	1.78	1.61	1.79		4.36	6.76	5	6.84	3.88	7.32	4.98		1.9	2.94	1.35	2.27	2.32	2.34	2.4	1.99		9.03	16.07	7.33	20.71		1.45	1.74	1.72	1.55	2.5		6.42	4.62	11.81	23.26	7.33	5.21	9.54	22.12	7.34	4.6	5.08	3.79	8.88
Eu151	0.616	0.627	0.874	1.19	0.537	0.67	0.595		1.43	2.4	1.76	2.55	1.36	2.76	2.25		0.703	0.996	0.518	0.8	0.689	0.734	0.852	0.657		3.13	4.73	2.48	5.07		0.48	0.587	0.602	0.594	0.845		2.05	1.49	3.61	4.51	2.04	1.4	2.99	5.16	2.26	1.74	1.89	1.64	3.04
Gd155	2.17	2.56	2.96	3.46	1.72	1.97	2.42		5.12	8.02	4.97	7.55	3.64	6.69	6.09		2.04	2.45	1.28	1.81	2.43	1.92	2.67	2.18		9.49	12.55	7.44	18.13		1.22	1.42	2.03	1.49	2.25		7.25	5.24	12.6	23.66	6.03	5.57	8.6	25.01	7.06	4.64	4.87	5.53	9.99
Tb159	0.371	0.363	0.409	0.449	0.214	0.289	0.289		0.74	1.15	0.77	1.03	0.69	1.03	0.84		0.247	0.359	0.216	0.337	0.341	0.369	0.356	0.395		1.098	1.7	0.891	2.69		0.16	0.256	0.291	0.213	0.303		1.09	0.64	1.64	3.6	0.95	0.68	1.09	2.92	0.83	0.66	0.64	0.82	1.34
Dy163	1.95	1.77	2.13	2.56	1.21	1.53	1.9		4.63	5.55	3.95	5.64	3.58	5.68	4.39		1.27	2.04	0.95	1.53	1.97	1.83	1.9	1.76		5.03	8.68	5.04	13.66		1.15	1.1	1.37	1.01	1.61		5.41	4.01	9.06	20.22	4.54	3.86	6.41	16.14	5	2.95	3.13	4.01	7.73
Ho165	0.335	0.332	0.337	0.383	0.255	0.298	0.316		0.68	0.81	0.562	0.85	0.507	1.01	0.71		0.266	0.303	0.162	0.266	0.35	0.301	0.326	0.32		1.16	1.77	0.77	2.4		0.196	0.184	0.242	0.178	0.3		0.9	0.641	1.37	3.37	0.673	0.609	1.11	2.55	0.671	0.533	0.485	0.559	0.95
Er166	0.75	0.593	0.71	0.89	0.446	0.55	0.77		1.33	2.27	1.26	1.46	1.16	2.32	2.16		0.471	0.726	0.364	0.627	0.718	0.7	0.733	0.686		2.48	3.75	2.41	6.17		0.532	0.522	0.58	0.433	0.619		2.09	1.42	2.94	9.41	1.74	1.62	2.57	6.37	1.95	1.28	1.19	1.46	2.66
Tm169	0.092	0.097	0.096	0.141	0.05	0.067	0.097		0.152	0.278	0.185	0.211	0.131	0.206	0.203		0.041	0.092	0.0305	0.068	0.108	0.056	0.093	0.084		0.2	0.365	0.259	0.762		0.045	0.047	0.069	0.053	0.069		0.249	0.152	0.309	1.19	0.184	0.214	0.264	0.69	0.255	0.097	0.105	0.1	0.248
Yb173	0.451	0.55	0.459	0.54	0.242	0.322	0.53		1.01	1.7	1.31	1.26	1.05	1.22	1.42		0.317	0.44	0.181	0.5	0.363	0.45	0.48	0.54		1.57	2.68	1.25	4.13		0.254	0.309	0.286	0.355	0.444		1.34	0.85	2.21	5.93	0.97	0.85	1.34	3.73	1.19	0.54	0.66	0.76	0.95
Lu175	0.062	0.092	0.054	0.089	0.061	0.037	0.052		0.147	0.156	0.145	0.233	0.045	0.122	0.145		0.058	0.055	0.0324	0.062	0.062	0.051	0.08	0.04		0.212	0.466	0.181	0.66		0.0362	0.0456	0.058	0.0336	0.062		0.185	0.109	0.243	0.746	0.148	0.101	0.226	0.61	0.183	0.079	0.127	0.069	0.209
Hf179	0.9	0.79	1.49	1.66	0.6	0.7	0.78		3.19	6.26	3.29	4.97	2.23	4.58	3.97		0.65	1.31	0.462	0.83	0.92	1.07	1.2	0.86		3.8	7.44	4.16	10.99		0.393	0.493	0.589	0.317	1.04		5.33	3.07	6.99	15.92	4.61	3.21	5.12	11.71	4.49	2.58	3.22	2.89	4.98
Ta181	0.0073	0.0113	0.0056	0.0235	0.0094	<LLOD	0.0048		0.034	0.226	0.075	0.227	0.042	0.276	0.132		0.0147	0.0302	0.0059	0.015	0.0171	0.0126	0.0098	0.0209		0.093	0.214	0.111	0.222		<LLOD	<LLOD	0.0136	<LLOD	0.026		0.137	0.055	0.306	0.59	0.19	0.066	0.258	0.58	0.15	0.054	0.11	0.075	0.37
Pb208	0.069	0.0237	0.085	0.095	0.041	0.074	0.0161		0.149	0.126	0.031	0.056	0.07	0.14	0.038		0.039	0.059	0.117	0.053	0.032	0.0243	0.028	0.054		0.075	0.144	0.052	0.257		0.041	0.059	0.038	0.054	0.035		0.066	0.09	0.083	0.173	<LLOD	<LLOD	0.059	0.157	0.084	0.121	0.066	0.028	0.068
Th232	0.0277	0.0224	0.029	0.047	0.0143	0.0216	0.0185		0.369	0.92	0.122	0.24	0.079	0.62	0.092		0.0236	0.0356	0.0295	0.0409	0.0264	0.0278	0.0236	0.0148		0.1	0.228	0.064	0.302		0.0111	0.0139	0.0087	0.0157	<LLOD		0.155	0.063	0.247	0.613	0.089	0.035	0.148	0.393	0.062	0.038	0.063	0.055	0.126
U238	0.0099	<LLOD	<LLOD	0.0096	<LLOD	0.0076	0.0029		0.104	0.235	<LLOD	0.046	0.032	0.204	0.037		<LLOD	0.0065	<LLOD	0.0049	<LLOD	<LLOD	<LLOD	<LLOD		0.026	0.045	<LLOD	0.074		0.0079	0.0041	<LLOD	0.0049	0.0029		0.031	<LLOD	0.046	0.121	<LLOD	0.026	0.047	0.068	0.028	<LLOD	0.027	0.0127	0.047
LLOD (lower limit of detection)
Uncertanties of individual points (1-sigma errors)
Element	cpx-1b	cpx-2	cpx-6	cpx-7	cpx-10	cpx-11	cpx-13a		cpx1-bd_ext	cpx1-bd_final	cpx2-sbc1	cpx2-sbc2	cpx3-sbc1	cpx3-sbc2	cpx3-znfinaint		cpx-4	cpx-5	cpx-6	cpx-7	cpx-10	cpx-11	cpx-12	cpx-9a		cpx2bd	cpx4bd	cpx1bd	cpx1bd_ext		cpx-1	cpx-1-3	cpx-2	cpx-3	cpx-7		cpx2-bdext	cpx2-bdinterm	cpx2-bdextern	cpx2-bdfinal	cpx7-bdint1	cpx7-bdintm2	cpx7-bdext1	cpx7-bdext2fn	cpx1-zn1-int	cpx1-zn2-intm	cpx1-zn3-intm-esc	cpx1-zn4-intm-clar	cpx1-zn5-bdesc
Li7	0.59	0.47	0.39	0.38	0.53	0.36	0.62		1.3	1.15	3.67	2.61	2.81	1.21	1.59		0.81	0.34	0.7	0.61	0.49	0.41	0.65	0.9		1.48	1.65	1.7	1.52		0.76	0.49	0.35	0.45	0.34		1.63	1.67	1.61	1.47	1.15	1.61	1.16	1.87	1.87	1.91	2.53	2.72	2.2
P31	2.7	2.57	3.55	4.51	3.3	3.6	2.54		38.5	38.25	35.26	30.92	43.07	24	39.05		2.84	3.54	2.49	2.91	2.48	2.58	2.21	2.58		62.02	48.78	63.87	30.92		3.02	3.08	2.81	3.69	3.37		17.47	16.34	20.96	11.07	35.73	28.2	15.17	17.22	23.91	17.34	16.04	16.01	30.81
Sc45	3.05	3.22	3.81	3.84	2.81	3.23	3.92		15.64	19.11	15.86	13.07	15.72	13.79	17.93		2.25	2.71	2.16	2.64	3.24	3.41	3.53	3.49		3.62	3.42	4.41	3.44		2.42	2.5	3.42	2.81	4.51		7.55	6.13	4.17	4.33	8.17	7.96	5.05	4.06	7.2	11.93	9.38	10.3	7.1
Ti49	151.68	155.48	202.85	251.74	156.46	169.62	160.82		1466.45	2509.23	1828.12	2609.2	1565.26	2304.47	2413.62		135.08	202.09	116.7	185.82	178.42	170.12	179.78	176.11		1114.49	1124.84	1516.82	873.91		176.36	196.09	222.83	217.19	359.9		1459.02	1011.66	1683.1	1074.6	1539.64	1195.39	1976.38	1427.87	1777.33	1463.33	1628.26	1382.43	2350.58
V51	5.12	4.61	6.93	8.13	4.86	5.66	4.74		27.83	29.45	28.76	33.32	32.49	29.08	32.06		5.06	6.71	4.18	6.45	5.14	5.16	5.45	5.4		34.43	36.32	38.67	28.08		6.73	6.66	6.02	7.85	9.89		57.31	50.26	59.93	43.22	63.04	51.58	68.75	54.05	63.98	70.43	89.88	69.03	86.3
Cr52	376.1	355.18	47.95	56.12	385.94	253.03	340.77		134.58	79.34	209.89	94.61	205.83	74.64	170.58		285.71	125.94	247.14	201.18	248.61	172.25	134.21	269.72		3.56	4.28	11.62	4.58		350.73	560.01	246.85	255.82	126.43		158.97	107.11	4.01	5.57	141.33	75.85	9.84	6.69	7.41	153.72	138.09	154.05	5.7
Mn55	25.69	24.13	32.19	32.59	25.81	30.93	26.21		146.31	147.75	123.06	131.16	162.3	167.9	146.46		22.89	25.38	22.33	24.53	21.81	23.23	23.29	24.93		195.76	225.63	167.53	194.53		49.44	51.76	45.13	54.54	59.78		83.18	88.16	119.91	108.83	94.72	99	117.26	123.26	122.84	125.25	131.83	121.24	135.92
Co59	1.48	1.41	1.87	1.93	1.59	1.8	1.57		7.57	7.29	7.3	7.35	9.55	8.38	9.57		1.14	1.2	1.19	1.2	1.08	1.13	1.12	1.19		3.59	3.58	3.31	2.81		3.64	3.63	3.64	4.24	4.82		4.12	4.38	4.17	4.15	4.55	4.72	4.67	4.22	5.43	6.28	6.19	5.69	5.57
Ni60	11.95	11.08	10.3	10.4	12.94	12.18	12.01		37.07	44.7	36.17	38.67	54.78	37	53.76		9.38	9.12	10.04	8.98	9	8.87	8.16	9.77		16.52	15.98	18.21	13.67		32.4	33.38	30.51	34.24	29.07		27.25	26.82	20.26	18.74	24.47	28.77	25.87	23.62	24.46	36.55	31.44	34.98	37.63
Cu65	0.061	0.062	0.082	0.079	0.069	0.093	0.061										0.093	0.099	0.08	0.096	0.074	0.055	0.063	0.061							0.093	0.086	0.09	0.41	0.093
Zn66	1.23	1.14	1.74	1.77	1.28	1.64	1.33		7.91	8.63	8.33	7.89	8.61	8.75	8.72		0.95	1.11	0.92	1.06	0.92	0.95	0.92	1.05		5.1	6.95	4.79	6.87		1.7	1.8	1.65	2.05	2.28		4.07	4.15	6.04	6.46	4.19	4.27	5.54	6.4	7.02	5.73	5.84	5.79	7.27
Ga71	0.29	0.3	0.36	0.49	0.36	0.34	0.33										0.24	0.31	0.2	0.27	0.22	0.2	0.21	0.21							0.42	0.47	0.43	0.48	0.64
Sr88	3.12	3.05	3.63	3.95	3.69	3.3	3.17		9.48	12.02	10.09	12.48	10.11	12.93	12.63		2.92	3.65	3.4	3.46	3.17	3.14	3.06	3.12		11.07	12	8.79	8.92		4.38	5.01	5.32	5.43	5.96		11.72	11.55	16.1	9.41	12.41	12.03	15.68	13.29	16.66	14.29	14.7	14.35	20.43
Y89	0.45	0.47	0.49	0.56	0.34	0.42	0.51		1.37	1.94	1.29	1.83	1.25	1.95	1.78		0.25	0.38	0.2	0.31	0.39	0.36	0.41	0.41		2.17	3.19	1.71	5.28		0.25	0.28	0.33	0.25	0.41		2.53	1.91	4.5	10.89	2.54	2.17	3.81	9.44	3.34	2.32	2.73	2.8	5.23
Zr90	0.69	0.75	1.12	1.56	0.58	0.71	0.85		7.75	14.19	8.43	14.18	7.56	16.78	12.13		0.5	0.88	0.37	0.71	0.67	0.65	0.75	0.58		13.63	21.84	12.32	39.22		0.5	0.59	0.76	0.56	1.34		11.28	6.12	17.41	59.04	10.3	7.63	14.39	41.5	11.97	7.3	9.36	8.53	19.56
Nb93	0.015	0.014	0.02	0.028	0.012	0.017	0.015		0.13	0.25	0.11	0.15	0.073	0.28	0.12		0.017	0.02	0.014	0.017	0.013	0.014	0.017	0.016		0.088	0.14	0.096	0.17		0.012	0.013	0.017	0.015	0.023		0.13	0.054	0.25	0.64	0.14	0.091	0.23	0.55	0.13	0.058	0.1	0.096	0.21
La139	0.096	0.1	0.13	0.15	0.1	0.11	0.11		0.6	1.05	0.66	0.73	0.49	1.18	0.66		0.097	0.13	0.086	0.11	0.11	0.1	0.11	0.11		0.8	1.5	0.86	2.73		0.08	0.098	0.12	0.11	0.14		0.75	0.53	1.76	6.02	0.78	0.59	1.4	4.58	1.15	0.6	0.77	0.74	1.84
Ce140	0.27	0.28	0.46	0.53	0.32	0.37	0.29		2.08	3.54	2.31	3.07	1.94	4.46	2.57		0.33	0.51	0.3	0.44	0.35	0.36	0.39	0.38		1.65	3.17	1.83	5.54		0.36	0.4	0.45	0.47	0.63		1.37	0.93	3.05	9.3	1.44	1.01	2.31	7.55	1.92	1.11	1.44	1.22	2.93
Pr141	0.058	0.06	0.087	0.11	0.066	0.071	0.064		0.64	1.02	0.73	0.96	0.57	1.19	0.79		0.065	0.093	0.061	0.086	0.073	0.076	0.08	0.076		0.64	1.07	0.63	1.82		0.085	0.096	0.11	0.12	0.16		0.32	0.23	0.67	1.99	0.36	0.29	0.58	1.82	0.49	0.33	0.39	0.32	0.76
Nd143	0.45	0.48	0.73	0.77	0.47	0.54	0.55		1.68	2.8	1.83	2.7	1.63	2.96	2.35		0.34	0.47	0.3	0.43	0.41	0.36	0.37	0.38		3.01	6.09	3.09	8.93		0.31	0.34	0.38	0.36	0.5		2.83	1.86	5.37	12.41	3.2	2.15	4.43	13.89	3.85	2.6	3.3	2.59	5.73
Sm147	0.18	0.19	0.28	0.3	0.2	0.19	0.21		0.47	0.59	0.44	0.56	0.41	0.59	0.46		0.19	0.26	0.15	0.22	0.22	0.24	0.26	0.23		0.93	1.59	0.8	2.01		0.15	0.17	0.17	0.17	0.24		0.84	0.63	1.52	2.97	1	0.75	1.36	3.18	1.17	0.79	0.9	0.7	1.62
Eu151	0.06	0.063	0.085	0.11	0.062	0.077	0.07		0.24	0.37	0.28	0.41	0.24	0.47	0.4		0.063	0.084	0.052	0.073	0.064	0.072	0.085	0.072		0.42	0.63	0.35	0.68		0.045	0.052	0.054	0.055	0.071		0.25	0.19	0.45	0.56	0.27	0.2	0.42	0.74	0.36	0.3	0.33	0.3	0.57
Gd155	0.23	0.27	0.32	0.37	0.23	0.26	0.3		0.63	0.83	0.56	0.77	0.48	0.74	0.69		0.2	0.23	0.16	0.19	0.23	0.2	0.27	0.24		1.39	1.82	1.13	2.58		0.14	0.15	0.2	0.17	0.22		1	0.76	1.74	3.26	0.92	0.88	1.36	3.96	1.27	0.91	0.98	1.14	2.09
Tb159	0.038	0.038	0.044	0.049	0.029	0.037	0.037		0.15	0.23	0.16	0.21	0.15	0.23	0.19		0.025	0.033	0.024	0.032	0.031	0.035	0.035	0.04		0.1	0.15	0.089	0.22		0.025	0.039	0.044	0.035	0.049		0.24	0.15	0.37	0.83	0.23	0.17	0.28	0.77	0.24	0.2	0.2	0.27	0.45
Dy163	0.15	0.14	0.17	0.2	0.12	0.15	0.17		1.14	1.34	0.96	1.36	0.91	1.43	1.14		0.18	0.27	0.14	0.22	0.29	0.3	0.33	0.33		0.48	0.78	0.51	1.14		0.1	0.1	0.12	0.1	0.14		0.79	0.61	1.33	2.95	0.72	0.64	1.06	2.68	0.93	0.59	0.65	0.84	1.63
Ho165	0.038	0.039	0.041	0.047	0.036	0.042	0.045		0.099	0.11	0.08	0.12	0.079	0.14	0.11		0.027	0.03	0.02	0.028	0.032	0.03	0.033	0.033		0.14	0.2	0.1	0.27		0.02	0.02	0.024	0.021	0.029		0.1	0.079	0.16	0.36	0.084	0.079	0.14	0.31	0.095	0.082	0.077	0.089	0.15
Er166	0.11	0.098	0.12	0.15	0.089	0.11	0.15		0.21	0.28	0.17	0.19	0.17	0.27	0.26		0.057	0.072	0.049	0.065	0.066	0.065	0.068	0.065		0.41	0.61	0.41	0.98		0.073	0.074	0.082	0.068	0.091		0.28	0.2	0.39	1.16	0.25	0.24	0.38	0.9	0.32	0.24	0.23	0.28	0.5
Tm169	0.014	0.015	0.016	0.022	0.011	0.014	0.017		0.038	0.054	0.039	0.043	0.033	0.046	0.046		0.01	0.017	0.0084	0.014	0.018	0.013	0.017	0.017		0.032	0.048	0.039	0.082		0.011	0.012	0.016	0.014	0.017		0.048	0.033	0.059	0.2	0.038	0.045	0.054	0.13	0.057	0.029	0.032	0.031	0.065
Yb173	0.081	0.098	0.091	0.1	0.061	0.08	0.11		0.2	0.26	0.2	0.2	0.19	0.2	0.21		0.081	0.1	0.055	0.12	0.089	0.11	0.12	0.14		0.27	0.43	0.23	0.63		0.053	0.064	0.06	0.07	0.08		0.26	0.18	0.4	1.01	0.2	0.18	0.27	0.71	0.26	0.15	0.17	0.2	0.25
Lu175	0.012	0.016	0.012	0.017	0.013	0.011	0.012		0.054	0.058	0.05	0.077	0.023	0.047	0.055		0.012	0.012	0.0092	0.013	0.012	0.011	0.015	0.01		0.045	0.088	0.042	0.12		0.0078	0.0091	0.011	0.0082	0.012		0.03	0.022	0.035	0.078	0.025	0.021	0.034	0.072	0.033	0.024	0.03	0.02	0.042
Hf179	0.17	0.16	0.28	0.31	0.14	0.17	0.18		0.31	0.45	0.27	0.35	0.23	0.34	0.3		0.12	0.2	0.096	0.15	0.16	0.19	0.22	0.18		0.47	0.87	0.51	1.25		0.069	0.078	0.09	0.065	0.13		0.45	0.28	0.58	1.23	0.41	0.3	0.46	1.01	0.44	0.29	0.36	0.33	0.55
Ta181	0.0033	0.0043	0.0039	0.0073	0.0047	0.0039	0.0034		0.021	0.041	0.022	0.038	0.016	0.044	0.032		0.0055	0.009	0.004	0.0059	0.0061	0.0049	0.0043	0.0079		0.023	0.04	0.026	0.042		0.0039	0.003	0.0055	0.003	0.0072		0.03	0.018	0.06	0.11	0.041	0.02	0.057	0.12	0.04	0.021	0.034	0.026	0.1
Pb208	0.012	0.0077	0.014	0.016	0.01	0.015	0.0063		0.049	0.042	0.018	0.023	0.028	0.049	0.017		0.011	0.012	0.017	0.011	0.0092	0.0082	0.0081	0.01		0.03	0.049	0.025	0.079		0.011	0.013	0.012	0.013	0.012		0.022	0.026	0.025	0.044	0.014	0.016	0.02	0.046	0.033	0.046	0.031	0.017	0.032
Th232	0.0072	0.007	0.0088	0.012	0.0065	0.0074	0.0065		0.091	0.2	0.038	0.064	0.028	0.16	0.032		0.007	0.0087	0.0081	0.0095	0.0068	0.0071	0.0066	0.0056		0.023	0.04	0.018	0.05		0.0042	0.0056	0.0045	0.0064	0.0046		0.03	0.016	0.041	0.082	0.019	0.012	0.028	0.059	0.017	0.014	0.019	0.017	0.03
U238	0.0032	0.0025	0.0028	0.0036	<0.00	0.0033	0.0017		0.03	0.051	0.013	0.019	0.015	0.044	0.018		0.0024	0.0033	0.0028	0.0025	0.003	0.0029	0.002	0.0022		0.011	0.014	0.0094	0.019		0.0032	0.0024	0.0024	0.0034	0.0021		0.011	0.0095	0.015	0.024	0.011	0.011	0.013	0.019	0.012	0.011	0.011	0.007	0.017
Minimum detection limits (99% confidence).
Element	cpx-1b	cpx-2	cpx-6	cpx-7	cpx-10	cpx-11	cpx-13a		cpx1-bd_ext	cpx1-bd_final	cpx2-sbc1	cpx2-sbc2	cpx3-sbc1	cpx3-sbc2	cpx3-znfinaint		cpx-4	cpx-5	cpx-6	cpx-7	cpx-10	cpx-11	cpx-12	cpx-9a		cpx2bd	cpx4bd	cpx1bd	cpx1bd_ext		cpx-1	cpx-1-3	cpx-2	cpx-3	cpx-7		cpx2-bdext	cpx2-bdinterm	cpx2-bdextern	cpx2-bdfinal	cpx7-bdint1	cpx7-bdintm2	cpx7-bdext1	cpx7-bdext2fn	cpx1-zn1-int	cpx1-zn2-intm	cpx1-zn3-intm-esc	cpx1-zn4-intm-clar	cpx1-zn5-bdesc
Li7	0.0991	0.089	0.115	0.116	0.0925	0.085	0.0959		0.431	0.517	0.497	0.469	0.38	0.371	0.417		0.109	0.0845	0.0853	0.0973	0.0951	0.0629	0.114	0.097		0.381	0.558	0.294	0.476		0.0637	0.0871	0.104	0.0715	0.141		0.162	0.449	0.298	0.334	0.412	0.416	0.436	0.487	0.237	0.52	0.216	0.3	0.439
P31	3.49	3.69	4.26	4.18	3.8	4.28	3.72		44.84	47.64	38.13	38.34	38.46	39.85	37.91		3.43	3.64	3.4	3.33	3.58	3.49	3.13	3.51		31.19	42.23	38.57	41.91		4.35	4.3	5.03	4.98	4.69		22.14	22.37	23.08	23.35	21.84	21.63	22.81	20.25	22.79	26.4	28.5	25.23	22.2
Sc45	0.104	0.116	0.122	0.128	0.123	0.132	0.12		0.477	0.481	0.364	0.454	0.463	0.452	0.409		0.0964	0.101	0.0989	0.0841	0.101	0.0968	0.0914	0.101		0.316	0.465	0.428	0.433		0.101	0.105	0.12	0.111	0.105		0.331	0.282	0.329	0.312	0.32	0.314	0.325	0.294	0.317	0.363	0.389	0.346	0.307
Ti49	0.278	0.339	0.37	0.334	0.377	0.278	0.298		1.9	1.98	2.2	<0.00000	2.38	1.64	1.13		0.305	0.308	0.24	0.339	0.365	0.269	0.302	0.172		<0.00000	2.13	1.33	0.963		0.326	0.251	0.487	0.394	0.368		0.548	<0.00000	1.01	0.981	0.57	0.814	0.559	0.739	0.567	0.666	<0.00000	1.31	0.796
V51	0.035	0.0311	0.035	0.0387	0.0345	0.0351	0.0262		0.142	0.119	0.0826	0.0972	0.0963	0.1	0.0979		0.0323	0.0322	0.0287	0.0382	0.0328	0.0319	0.0314	0.0298		0.0935	0.131	0.153	0.111		0.0352	0.0383	0.0547	0.045	0.049		0.0972	0.129	0.0838	0.0906	0.0957	0.0932	0.116	0.0774	0.0802	0.106	0.148	0.123	0.0998
Cr52	0.659	0.689	0.76	0.779	0.714	0.804	0.669		2.63	2.77	2.23	2.3	2.39	2.36	2.33		0.74	0.772	0.695	0.696	0.746	0.732	0.654	0.719		1.78	2.45	2.38	2.41		0.899	0.885	1.01	1.03	0.966		1.79	1.89	1.98	1.94	1.84	1.87	1.85	1.73	1.93	2.29	2.35	2.06	1.92
Mn55	0.155	0.172	0.182	0.188	0.177	0.188	0.166		1.22	1.22	0.96	1.05	0.99	0.975	0.958		0.152	0.166	0.149	0.138	0.157	0.154	0.138	0.158		0.739	1.01	1.01	1.06		0.18	0.177	0.204	0.203	0.203		0.556	0.595	0.562	0.565	0.543	0.505	0.557	0.489	0.538	0.661	0.674	0.566	0.525
Co59	0.00666	0.0118	0.00742	0.015	0.0102	0.00788	0.0164		0.0521	<0.00000	0.106	0.0782	0.0825	0.0664	0.0461		0.0105	<0.00000	0.012	0.00659	0.0118	0.00777	0.013	0.0111		0.0446	0.0428	0.0731	0.0967		0.00769	0.00748	0.0256	<0.00000	0.0124		<0.00000	0.0494	0.0501	0.0597	0.0602	0.0787	0.0484	0.0786	0.0495	0.0412	<0.00000	0.0364	0.035
Ni60	<0.00000	0.0748	0.0729	0.0737	0.0355	0.0776	0.057		3.42	3.55	3.94	<0.00000	3.02	<0.00000	2.87		0.063	0.0887	0.0479	0.056	0.0408	<0.00000	0.032	0.0547		<0.00000	<0.00000	2.85	2.92		0.039	0.0657	0.0917	0.0632	0.0771		<0.00000	<0.00000	<0.00000	<0.00000	2.39	1.71	1.66	2.7	<0.00000	<0.00000	<0.00000	2.51	1.71
Cu65	0.0611	0.0559	0.0528	0.0308	0.0515	0.0325	0.0551										0.0613	0.0579	0.0404	0.0609	0.0687	0.0643	0.0537	0.0459							0.0482	0.0469	0.0802	0.103	0.0389
Zn66	0.126	0.114	0.163	0.12	0.102	0.111	0.0975		0.603	0.881	0.487	0.914	0.601	0.715	0.632		0.118	0.137	0.113	0.111	0.127	0.14	0.136	0.109		0.445	0.541	0.842	0.668		0.159	0.181	0.189	0.18	0.179		0.504	0.531	0.341	0.526	0.629	0.482	0.469	0.492	0.417	0.802	0.443	0.562	0.64
Ga71	0.0157	0.0186	0.0203	0.0145	0.0242	0.0285	0.0129										0.0173	0.0267	0.0186	0.0154	0.0251	0.0234	0.0175	0.0149							0.0227	0.0221	0.0134	0.0131	0.0184
Sr88	0.00401	<0.00000	0.00448	0.0064	0.0124	0.00675	0.00573		0.0364	<0.00000	0.0151	0.0272	<0.00000	<0.00000	0.0159		0.0116	0.00675	0.00576	0.0145	0.0049	0.00457	<0.00000	0.00461		0.019	0.0149	0.0207	0.0212		0.00631	0.00971	0.00741	0.0102	0.00507		0.0201	0.0122	0.0124	0.012	0.021	0.0212	0.0119	<0.00000	0.0172	0.0143	<0.00000	0.0178	0.0171
Y89	0.0108	<0.00000	0.00699	<0.00000	0.0118	0.00746	0.00633		<0.00000	<0.00000	0.028	0.0289	0.0427	<0.00000	0.0202		<0.00000	<0.00000	0.00893	0.00853	0.0108	<0.00000	0.00845	0.00723		0.0192	0.0184	0.0257	<0.00000		<0.00000	0.00703	0.006	0.00827	<0.00000		0.0148	0.0221	<0.00000	0.0155	0.0222	0.0159	0.0156	<0.00000	0.0278	0.0268	<0.00000	<0.00000	0.0229
Zr90	0.0168	0.0122	<0.00000	0.019	0.0225	0.0142	0.012		0.0823	0.0492	<0.00000	0.0398	0.0415	0.0405	0.0555		0.0223	0.0344	0.017	0.0115	0.0145	0.0272	0.0161	0.0239		<0.00000	<0.00000	0.0373	0.0382		<0.00000	0.014	0.0119	<0.00000	0.0164		0.0416	<0.00000	<0.00000	0.0306	0.0308	0.0312	0.0429	0.0402	0.0438	0.0365	0.0568	0.0558	<0.00000
Nb93	0.00918	0.00543	<0.00000	0.00846	0.00579	<0.00000	<0.00000		<0.00000	0.0282	0.0222	<0.00000	<0.00000	0.0335	0.0231		0.0083	0.0064	<0.00000	0.00735	0.0114	<0.00000	<0.00000	<0.00000		0.0153	0.0207	<0.00000	<0.00000		<0.00000	<0.00000	<0.00000	0.007	0.00696		<0.00000	0.0168	0.0241	0.0234	0.0235	0.0168	<0.00000	<0.00000	0.0165	0.0194	0.0301	0.017	0.0231
La139	0.00541	0.00391	0.00427	0.0061	0.00721	0.00643	0.00668		0.019	<0.00000	<0.00000	0.0226	0.0167	0.0163	0.0275		0.00413	0.00781	<0.00000	<0.00000	0.00657	<0.00000	0.00515	0.00623		0.0104	<0.00000	0.0279	<0.00000		<0.00000	<0.00000	0.00458	0.00446	0.00626		0.0112	0.0117	<0.00000	0.0116	<0.00000	<0.00000	0.0163	0.0108	<0.00000	0.0139	0.0265	0.0123	<0.00000
Ce140	0.00333	0.0034	0.00741	<0.00000	0.0051	0.00787	0.00577		0.0168	0.0248	0.0277	<0.00000	<0.00000	<0.00000	0.0145		<0.00000	0.004	<0.00000	0.00459	0.0041	0.0054	0.00553	0.00385		<0.00000	0.0144	0.0245	<0.00000		<0.00000	<0.00000	<0.00000	<0.00000	0.00635		0.0162	0.0121	0.0173	0.0238	0.012	0.0122	0.0168	0.0111	0.0121	<0.00000	<0.00000	0.0179	0.0121
Pr141	0.00291	<0.00000	<0.00000	<0.00000	0.00449	0.00346	0.00294		<0.00000	0.016	0.0125	0.0129	<0.00000	<0.00000	0.0127		<0.00000	0.00346	0.00511	0.00282	<0.00000	0.00332	<0.00000	0.00336		0.00869	0.0118	<0.00000	<0.00000		<0.00000	0.00323	0.00389	0.00379	<0.00000		<0.00000	0.0132	<0.00000	<0.00000	0.0132	0.00946	<0.00000	0.00864	0.0133	<0.00000	0.0174	0.00986	0.019
Nd143	<0.00000	0.028	0.0305	0.0308	0.0514	0.0458	0.0275		0.125	0.0913	0.0716	0.0739	0.0772	<0.00000	0.103		0.0411	0.0316	0.0714	<0.00000	0.0324	0.0428	0.0438	0.0431		<0.00000	0.0999	0.0984	<0.00000		0.0409	0.0282	0.034	<0.00000	0.0466		<0.00000	<0.00000	<0.00000	<0.00000	0.058	0.102	<0.00000	0.0535	<0.00000	0.0687	<0.00000	<0.00000	0.0583
Sm147	0.0243	0.0249	0.0544	<0.00000	0.0266	0.041	<0.00000		0.151	<0.00000	<0.00000	0.132	0.0985	0.0972	0.191		<0.00000	<0.00000	0.0244	<0.00000	<0.00000	<0.00000	0.0404	<0.00000		<0.00000	0.0953	0.163	0.136		<0.00000	0.0245	<0.00000	0.0288	<0.00000		0.123	0.129	0.131	0.0735	0.128	0.106	0.0727	0.068	0.104	0.0869	0.135	0.171	<0.00000
Eu151	<0.00000	<0.00000	0.00749	0.00755	0.0102	0.00786	0.00663		0.0321	0.0336	0.0266	0.0277	0.0412	0.0286	0.028		0.0106	0.0141	0.00698	0.00942	<0.00000	<0.00000	0.00935	<0.00000		<0.00000	0.0451	0.0444	0.0263		0.0132	<0.00000	<0.00000	<0.00000	0.00856		0.0188	0.02	0.0289	0.0284	0.0204	0.0208	0.0204	<0.00000	0.0214	<0.00000	0.0283	0.0324	0.0222
Gd155	0.0489	0.0354	<0.00000	0.0553	0.0655	0.0584	0.0497		0.195	<0.00000	0.162	0.12	<0.00000	0.125	<0.00000		<0.00000	<0.00000	0.0593	<0.00000	0.059	<0.00000	0.0334	0.0408		0.0862	0.117	<0.00000	0.118		<0.00000	<0.00000	0.0377	0.0367	<0.00000		0.0909	0.0963	0.171	0.137	0.196	0.173	<0.00000	0.0926	0.102	0.172	<0.00000	0.109	<0.00000
Tb159	<0.00000	<0.00000	0.00534	<0.00000	0.00515	0.00794	0.00821		0.0357	0.0215	<0.00000	0.0175	0.0183	0.031	0.0246		<0.00000	0.00555	0.00674	0.00647	0.00582	0.00555	0.00661	0.00573		0.0158	0.0151	0.0149	0.0216		0.00434	0.00422	<0.00000	0.00856	0.0049		0.0225	<0.00000	0.0197	0.0136	0.0137	0.0196	0.0302	<0.00000	0.0138	<0.00000	<0.00000	0.0145	<0.00000
Dy163	0.0328	0.0275	<0.00000	0.0217	0.0212	0.0329	0.0199		0.12	<0.00000	0.0945	0.0962	0.099	0.135	0.0913		0.02	0.0378	<0.00000	<0.00000	0.0227	0.0304	<0.00000	0.0311		<0.00000	0.116	<0.00000	<0.00000		0.0169	0.0232	<0.00000	0.0191	0.0328		<0.00000	<0.00000	<0.00000	<0.00000	0.07	0.071	<0.00000	0.0648	0.0707	0.0833	0.159	0.128	0.071
Ho165	0.00508	0.0052	0.00804	0.00576	0.00559	<0.00000	0.00521		0.0277	<0.00000	<0.00000	0.0444	<0.00000	0.0174	0.024		0.00535	<0.00000	0.00706	0.00477	0.00852	<0.00000	<0.00000	<0.00000		0.0122	<0.00000	<0.00000	0.0168		0.00444	0.0075	0.00523	0.0051	0.00718		0.0125	<0.00000	0.0188	<0.00000	0.0183	<0.00000	0.0179	0.0167	0.0128	0.015	<0.00000	0.0132	0.0127
Er166	<0.00000	0.0155	<0.00000	0.0242	0.0166	0.0182	0.0268		0.0871	<0.00000	0.0508	0.0529	<0.00000	<0.00000	<0.00000		0.0163	0.0178	<0.00000	<0.00000	<0.00000	0.0171	<0.00000	<0.00000		0.0525	<0.00000	0.0497	0.072		0.013	<0.00000	<0.00000	<0.00000	0.0254		0.0408	0.0431	0.0439	<0.00000	0.0752	<0.00000	0.0609	0.081	0.0445	<0.00000	0.101	<0.00000	0.0452
Tm169	<0.00000	<0.00000	0.00553	0.00794	0.00547	<0.00000	0.00725		0.024	<0.00000	0.0143	<0.00000	<0.00000	0.016	0.0158		0.00534	0.00826	<0.00000	0.00478	<0.00000	0.0128	<0.00000	<0.00000		0.0185	0.0145	<0.00000	0.0207		0.00452	0.0044	0.0053	0.00516	<0.00000		0.0182	0.0135	0.0194	0.0134	0.0135	0.0193	0.0133	0.0124	0.0135	0.0226	0.0249	0.0199	0.0234
Yb173	0.027	0.0391	0.0425	<0.00000	<0.00000	0.045	0.038		<0.00000	0.0939	<0.00000	0.0763	0.0799	<0.00000	0.0759		0.0303	<0.00000	<0.00000	<0.00000	<0.00000	<0.00000	0.0252	0.0301		<0.00000	<0.00000	<0.00000	0.0696		0.0248	0.0484	0.0293	<0.00000	<0.00000		<0.00000	0.0589	0.0838	0.0572	<0.00000	<0.00000	0.0554	<0.00000	<0.00000	0.0645	<0.00000	0.0562	0.0927
Lu175	0.00499	<0.00000	0.00556	0.00561	<0.00000	0.00591	<0.00000		0.0203	0.0421	0.0165	0.0171	0.0178	0.0174	0.0169		0.0052	0.00567	0.00683	0.0065	<0.00000	0.00539	<0.00000	0.00542		<0.00000	0.0171	<0.00000	0.0244		<0.00000	<0.00000	<0.00000	<0.00000	0.00478		0.0172	0.0129	<0.00000	<0.00000	0.0133	0.0136	0.0133	<0.00000	0.0199	0.029	0.0263	0.0151	0.0147
Hf179	0.0327	<0.00000	0.0514	0.0518	<0.00000	0.0543	0.0325		0.0684	0.123	0.0789	<0.00000	0.0852	0.102	0.0809		0.0323	0.0353	0.0428	0.0502	<0.00000	0.0347	<0.00000	0.0501		0.0671	0.0526	0.0518	<0.00000		0.0393	<0.00000	0.0329	<0.00000	0.0453		0.0415	<0.00000	<0.00000	0.0602	<0.00000	0.043	<0.00000	0.0389	0.0594	0.0493	<0.00000	<0.00000	0.0413
Ta181	<0.00000	<0.00000	0.00496	0.00501	0.00482	0.00526	0.00445		0.0312	<0.00000	0.0214	<0.00000	<0.00000	0.0237	0.0331		<0.00000	0.00739	0.00448	0.00428	0.00542	<0.00000	<0.00000	0.00903		0.0117	<0.00000	<0.00000	0.0227		0.00771	0.0061	0.00519	0.00504	<0.00000		<0.00000	0.0181	0.0131	0.0129	<0.00000	0.0134	0.0132	<0.00000	0.0139	0.0166	<0.00000	<0.00000	<0.00000
Pb208	0.00781	0.00921	<0.00000	0.0101	0.00841	0.00917	0.00775		0.0168	<0.00000	0.0239	0.0143	0.015	0.0254	<0.00000		0.0139	0.00753	0.00783	0.00958	0.0132	0.0121	0.00917	0.00692		0.0283	0.0272	0.0268	0.0275		0.00616	0.00598	0.0144	0.007	0.0139		0.0139	<0.00000	<0.00000	<0.00000	0.0267	0.0316	<0.00000	<0.00000	0.0332	0.0343	0.0313	0.018	0.0176
Th232	<0.00000	0.00482	0.00744	0.00532	0.00728	<0.00000	0.00478		0.0192	<0.00000	0.0223	0.0163	<0.00000	<0.00000	<0.00000		<0.00000	<0.00000	0.00475	0.00452	<0.00000	<0.00000	<0.00000	0.00535		0.0104	<0.00000	<0.00000	<0.00000		<0.00000	0.0062	0.0053	0.00731	0.00727		0.0167	<0.00000	0.0124	0.012	<0.00000	0.012	0.0116	<0.00000	0.0116	0.0135	0.0148	0.0166	0.0112
U238	<0.00000	0.00488	0.00435	<0.00000	<0.00000	<0.00000	<0.00000		<0.00000	0.0254	0.0197	0.0202	0.0148	0.0143	0.0238		0.00331	0.00359	0.0043	<0.00000	0.0051	0.00467	0.00274	0.00565		0.00926	<0.00000	0.0248	<0.00000		<0.00000	<0.00000	0.00436	0.00424	<0.00000		<0.00000	0.018	0.0129	<0.00000	0.0218	0.0127	<0.00000	0.0199	0.0124	0.0206	<0.00000	<0.00000	0.0123
