# Supplementary material
Source: MDPI journal article supplement (https://www.mdpi.com/2075-163X/12/6/775)
Supplement: s1 [file s1 › Supplem Mat D - ol_trace_pn_Revision.xlsx]

## Sheet: Labels
Supplementary Material D - Olivine trace element compositions from Ponte Nova Massif.
Table SD1. Trace element compositions for BCR-2G (USGS) calibration (primary) standard used for routines of trace element analyses of PN clinopyroxenes. Recommended values are from Jochum et al. (2011).
Table SD2. Trace element compositions for BIR-1 quality-control monitor (reference material) used for routines of trace element analyses of PN olivines. Recommended values are from Jochum et al. (2015).
Table SD3. Trace element compositions for olivine crystals from PN massif.

## Sheet: SD1. calib. std
Calibration Standards
All values reported in ppm
Trace Element Concentrations (MDL filtered)
run				1	1	1	1	1	1	1		2	2	2	2	2		3	3	3	3	3	3	3		4	4	4	4	4	4		5	5	5	5	5		6	6	6	6	6	6	6		7	7	7
sample	BHVO-2G - Ref. Values			117	117	117	117	117	117	117		163	163	163	163	163		41	41	41	41	41	41	41		58	58	58	58	58	58		165	165	165	165	165		30	30	30	30	30	30	30		180	180	180
Element	Concent.	(SD)		BHVO	BHVO-1b	BHVO-1c	BHVO-1d	BHVO-1e	BHVO-1f	BHVO-1g		BHVO-1a	BHVO-1b	BHVO-1c	BHVO-1d	BHVO-1e		BHVO-1a	BHVO-1b	BHVO-1c	BHVO-1d	BHVO-1e	BHVO-1f	BHVO-1g		BHVO-1a	BHVO-1b	BHVO-1c	BHVO-1d	BHVO-1e	BHVO-1f		BHVO-2a	BHVO-2b	BHVO-2c	BHVO-2d	BHVO-2e		BHVO-2a	BHVO-2b	BHVO-2c	BHVO-2f	BHVO-2g	BHVO-2h	BHVO-2i		BHVO-2a	BHVO-2b	BHVO-2c
Li7	4.5	0.085		4.51	4.39	4.17	4.7	4.63	3.96	4.59		4.3	4.42	4.54	4.47	4.27		4.56	4.44	4.25	4.14	3.04	4.35	4.71		4.43	4.17	4.92	4.25	4.39	4.29		4.63	4.25	4.29	4.28	4.58		4.11	4.58	4.43	4.3	4.99	4.02	4.51		4.16	4.28	4.78
P31	1265.56	87.28		1253.25	1275.61	1256.3	1290.56	1266.65	1263.86	1256.25		1245.64	1294.45	1251.26	1271.88	1265.27		1277.53	1254.6	1243.17	1288.56	965.08	1254.66	1275.8		1289.29	1293.22	1207.65	1242.08	1287.29	1281.38		1283.08	1245.26	1269.2	1267.57	1262.92		1261.59	1241.01	1290.75	1296.23	1269.64	1234.75	1267.8		1261.25	1253.09	1282.82
Ca42	81475.8	714.7		81327.2	81607.5	81318	81741.2	82421.3	80710.9	81302.3		81004.6	82577.2	80359.9	81870.2	81612.8		80642.8	82596.6	81439.7	81295.3	90537.1	80130.9	82836.4		81377.3	81494.3	82601.8	80267	82125.6	80938.9		82339.5	81057.6	80845.8	80989.1	82252.4		81560.2	82310.2	79875	81292.9	82832	81659.5	80968.6		82363.8	81399.8	80811.5
Sc45	33	2		33.63	33.05	32.62	32.47	33.06	33.35	32.87		33.89	32.48	32.33	33.15	33.24		32.6	33.46	32.48	33.6	17.02	33.15	32.79		33.47	32.76	32.26	33.47	33.48	32.68		33.28	33.55	31.85	33.15	33.4		33.13	32.51	33.39	33.82	32.45	32.26	33.51		33.53	32.77	33.07
Ti49	16720.5	119.86		16305.3	16498.8	16118.5	16288.3	16341.7	16255.7	16319.2		16284.4	16292.1	16352.7	16212.2	16355.3		16355.5	16221.8	16068.3	16619.9	11746.6	16273.6	16274		16221.2	16258.2	16457.5	16312.2	16581.8	15971		16294.4	16433.6	16108.4	16518.2	16187.5		16128	16358.1	16444.7	16341.2	16310.6	15993.3	16540.8		16329.9	16115.8	16487.6
V51	308	19		306.84	311.3	304.65	311.16	308.17	306.31	308.3		303.37	310.61	312.28	306.37	307.23		309.32	305.19	306.59	313.24	288.12	302.65	310.89		309.51	306.95	313.3	300.72	314.17	303.48		304.46	310.6	309.39	312.07	303.62		304.17	311.96	309.18	308.01	305.26	303.57	314.06		307.13	302.97	314.44
Cr52	293	12		288.62	297.17	292.87	292.93	297.09	292.79	289.62		289.02	294.23	298.45	292.01	291.17		290.06	290.82	298.66	299.11	204.77	289.89	289.2		295.21	293.07	296.9	283.96	299.88	289.15		292.21	294.98	291.5	291.48	295.05		289.26	296.95	293.07	292.83	293.06	288.04	298.13		292.38	289.7	298.01
Mn55	1316.65	232.35		1307.13	1334.28	1307.27	1317.87	1331.48	1308.52	1310.89		1305.15	1321.81	1329.12	1309.94	1315.97		1304.91	1299.62	1351.37	1343.29	964.11	1320.47	1279.52		1323.33	1322.56	1313.59	1294.06	1341.66	1304.56		1318.71	1323.62	1303.34	1317.5	1321.49		1294.09	1328.82	1334.29	1299.74	1331.13	1285.56	1345.68		1322.97	1288.37	1335.88
Co59	44	2		43.3	44.29	44.07	44.67	43.93	44.12	43.64		43.64	44.33	44.1	43.83	44.09		43.6	42.83	45.11	46.43	29.71	44.47	41.72		43.78	44.58	43.08	44.32	44.79	43.49		43.67	44.52	43.74	44.41	43.73		43.48	43.99	45.08	43.2	44.13	43.14	45.05		43.8	43.09	45.13
Ni62	116	7		114.78	115.52	116.47	118.59	115.72	114.82	116.3		116.77	114.85	116.8	115.03	116.58		114.51	112.93	120.45	121.88	81.23	115.39	111		117.42	115.18	114.91	116.33	116.07	116.31		113.26	119.2	115.73	116.11	115.9		114.2	118.64	116.29	111.91	117.36	116.84	116.95		117.86	115.4	114.16
Cu65	127	11		126.09	126.83	128.83	124.99	128.04	127.94	125.94		125.17	129.34	126.33	126.49	127.66		125.57	123.87	131.34	133.1	117.48	125.09	123.06		126.75	128.47	127.91	123.6	128.15	127.04		123.22	131.53	126.58	126.86	127.15		126.54	129.74	126.15	125.67	123.28	126.97	130.84		128.8	124.67	127.94
Zn66	102	6		98.21	103.15	103.19	104.55	105.69	98.88	100.81		99.38	104.96	101.81	101.65	102.23			101.32	102.64	108.32	97.78	99.45	100.44		101.53	105.72	99.22	99.37	103.15	103.23		102.29	101.93	101.75	100.88	103.18		105.02	102.06	99.42	99.19	102.29	100.08	106.72		102.63	101.07	101.69
Ga71	22	3		21.9	22.25	21.98	21.69	22.3	21.86	22		21.7	22.31	22.04	21.65	22.29		21.37	21.93	22.84	22.89	14.46	21.26	21.72		21.49	22.63	21.87	21.89	22.4	21.71		21.54	22.53	21.96	22.06	21.94		22.05	22.06	22.05	21.58	22.02	21.45	22.86		21.94	21.66	22.33
Rb85	9.2	0.04		8.93	9.47	9.26	9.08	9.32	9.02	9.31		8.95	9.56	9.08	9.02	9.41		9.04	9.39	9.12	9.3	6.03	9.11	9.26		9.25	9.31	9.03	9.08	9.42	9.12		9.11	9.48	8.96	9.24	9.27		9.1	9.31	9.3	8.85	9.37	8.95	9.57		9.21	9.2	9.17
Sr88	396	1		396.79	400.61	395.24	386.26	403.99	391.29	398.06		396.53	398.8	390.05	396.01	398.85		394.41	399.41	385.46	405.33	312.69	396.68	395.93		395.04	400.28	393.28	391.76	407.99	387.99		394.22	403.89	387.52	402.45	393.94		388.55	404.25	400.1	388.19	393.75	391.65	406.32		400.64	393.92	393.35
Y89	26	2		26.03	26.64	25.81	25.16	25.67	26.29	26.39		26.45	26.04	25.15	25.88	26.55		25.65	26.43	25.42	26.65	20.27	25.89	26.04		25.96	26.23	25.82	25.8	26.64	25.57		25.9	26.93	24.88	26.74	25.84		25.99	26.52	25.69	25.59	25.66	25.52	27.13		26.58	26.05	25.69
Zr90	170	7		171.25	171.17	169.79	165.64	171.04	169.87	171.15		171.28	171.59	164.9	170.15	172.43		167.29	172.22	168.82	173.35	122.04	170.3	168.28		167.96	172.46	168.7	170.27	173.89	166.72		168.98	175.04	164.56	173.05	169.66		169.38	171.62	170.13	170.9	166.02	164.93	177.73		174.76	169.54	167.23
Nb93	18.3	0.8		18.21	18.55	18.36	17.79	18.79	18.11	18.28		18.24	18.33	18.35	18.26	18.31		18.35	18.13	18.14	18.72	10.93	18.4	18.06		18.02	18.71	17.98	18.41	18.65	18.04		18.09	18.57	18.21	18.53	18.12		18.4	18.54	18.06	18.15	18	18.08	18.93		18.59	18.21	18.05
Mo95	3.8	0.2		3.66	4.01	3.77	3.74	3.84	3.87	3.72		3.83	3.78	3.8	3.68	3.92		3.73	3.84	3.88	3.78	3.86	3.88	3.69		3.99	4	3.42	3.57	4.25	3.7		3.72	3.78	3.97	3.73	3.79		3.56	3.94	4.15	3.75	3.43	3.94	3.88		3.79	3.66	3.85
Sn118	2.6	0.6		2.74	2.42	2.72	2.44	2.57	2.68	2.61		2.53	2.69	2.56	2.82	2.4		2.62	2.48	2.67	2.79	1.21	2.36	2.7		2.62	2.61	2.65	2.5	2.57	2.66		2.6	2.77	2.38	2.62	2.68		2.31	2.72	2.78	2.97	2.36	2.47	2.62		2.52	2.52	2.66
Sb121	0.3	0.13		0.224	0.32	0.39	0.28	0.25	0.29	0.38		0.29	0.267	0.41	0.25	0.3		0.292	0.32	0.269	0.3	<0.27	0.38	0.26		0.288	0.272	0.312	0.38	0.3	0.27		0.25	0.51	0.24	0.35	0.29		0.184	0.44	0.47	0.32	0.24	0.28	0.33		0.357	0.288	0.273
Cs133	0.1	0.02		0.097	0.1	0.106	0.095	0.1	0.1	0.102		0.09	0.103	0.115	0.096	0.097		0.093	0.099	0.108	0.114	<0.00	0.094	0.093		0.113	0.095	0.09	0.103	0.09	0.117		0.108	0.093	0.1	0.103	0.097		0.09	0.108	0.113	0.103	0.081	0.115	0.099		0.0962	0.109	0.098
Ba137	131	2		129.97	134.56	130.14	127.58	133.91	129.93	131.02		130.77	131.78	130.16	129.59	132.7		131.6	129.45	130.31	134.02	175.24	129.15	131.41		132.25	133.55	126.06	129.72	134.05	130.83		130.39	131.48	131.05	133.61	128.63		127.83	132.89	133.16	130.69	130.77	128.56	133.21		132.16	131.01	129.84
La139	15.2	0.2		15.1	15.36	15.31	14.89	15.13	15.09	15.51		15.38	15.27	14.75	15.23	15.4		14.96	15.18	15.52	15.51	19.68	14.92	15.09		15.23	15.37	14.98	15.06	15.47	15.1		15.21	15.35	14.95	15.33	15.19		14.79	15.68	15.11	14.99	15.54	14.82	15.52		15.61	15.27	14.93
Ce140	37.6	0.2		37.41	37.19	37.93	38.06	37.93	37.37	37.33		37.48	37.78	37.55	37.13	38.06		36.92	37.59	38.16	38.72	57.76	37.39	36.82		37.31	38.44	37.08	37.16	37.91	37.7		37.29	38.15	37.23	38.46	36.99		36.83	38.21	37.92	37.31	37.85	36.95	38.19		38.03	37.74	37.29
Pr141	5.35	0.22		5.42	5.36	5.28	5.32	5.49	5.26	5.34		5.28	5.4	5.41	5.37	5.3		5.35	5.22	5.46	5.54	8.31	5.34	5.19		5.46	5.41	5.09	5.36	5.4	5.41		5.32	5.51	5.17	5.4	5.38		5.29	5.41	5.34	5.39	5.38	5.14	5.53		5.43	5.42	5.3
Nd146	24.5	0.2		24.63	24.02	25.1	23.91	25.08	24.23	24.5		24.36	24.77	24.27	24.64	24.47		24.42	24.44	24.48	24.91	33.73	24.07	24.67		24.77	25.11	23.82	23.75	24.21	25.45		24.46	25.26	23.51	24.91	24.58		24.1	24.89	24.27	24.75	25	23.57	25.04		25.46	24.28	24.18
Sm149	6.1	0.03		5.89	6.23	6.01	6.48	6.41	5.86	5.94		6.15	5.91	6.44	5.65	6.41		6	6.34	6.13	5.84	8.09	6.07	6.27		6.16	6.5	5.47	6.1	6.07	6.43		6.15	6.17	5.92	6.14	6.14		6.17	6.07	6.03	5.95	6.38	5.81	6.37		6.07	5.96	6.3
Eu151	2.07	0.01		2.02	2.07	2.16	1.99	2.04	2.06	2.14		2.08	2.09	2.02	2.13	2.04		2.06	2.07	2.04	2.14	1.89	2.01	2.1		2.15	2.01	2	2.14	2.03	2.11		2.1	2.15	1.93	2.11	2.1		1.96	2.2	2.06	2.04	2.13	1.98	2.16		2.1	2.11	1.99
Gd157	6.16	0.05		6.29	5.85	6.31	6.23	6.24	6.28	5.94		5.81	6.55	6.16	6.5	5.86		5.95	6.37	6.13	6.28	6.24	6.1	6.14		6.42	6.08	5.78	6.36	6.15	6.27		6.36	6.29	5.71	6.29	6.26		5.98	5.89	6.66	6.47	6.26	5.67	6.3		6	6.39	6.11
Tb159	0.92	0.04		0.966	0.862	0.921	0.96	0.94	0.86	0.96		0.906	0.963	0.873	0.93	0.93		0.901	0.934	0.879	0.99	0.6	0.95	0.88		0.924	0.938	0.886	0.918	0.93	0.925		0.931	0.937	0.878	0.98	0.89		0.938	0.91	0.889	0.981	0.918	0.87	0.94		0.919	0.95	0.912
Dy161	5.28	0.05		5.25	5.37	5.16	5.44	5.22	5.38	5.18		5.5	5.14	5.17	5.12	5.5		5.28	5.37	5.1	5.32	3.95	5.27	5.37		5.36	5.31	5.05	5.35	5.4	5.24		5.28	5.47	5.03	5.26	5.41		5.19	5.37	5.22	5.32	5.43	4.93	5.55		5.33	5.42	5.3
Ho165	0.98	0.04		1.014	0.961	0.974	0.976	0.97	0.92	1.06		1.034	0.94	0.961	0.99	0.99		0.968	1.011	0.95	0.978	0.56	0.973	1.004		1.012	0.963	0.937	1.01	0.98	0.98		0.984	1.05	0.89	1.01	1		0.987	1.009	0.919	1.01	1.01	0.93	1.02		1.011	0.974	0.971
Er166	2.56	0.02		2.5	2.77	2.52	2.34	2.83	2.5	2.51		2.53	2.54	2.65	2.5	2.58		2.45	2.66	2.72	2.45	2.52	2.56	2.54		2.83	2.49	2.36	2.5	2.65	2.61		2.56	2.74	2.34	2.53	2.7		2.64	2.5	2.57	2.5	2.54	2.45	2.74		2.65	2.56	2.51
Tm169	0.34	0.02		0.342	0.345	0.336	0.34	0.301	0.375	0.348		0.361	0.312	0.363	0.318	0.353		0.311	0.385	0.349	0.324	0.57	0.332	0.35		0.351	0.347	0.312	0.344	0.347	0.345		0.339	0.362	0.313	0.359	0.337		0.322	0.357	0.344	0.359	0.325	0.307	0.377		0.333	0.353	0.339
Yb172	2.01	0.02		2.05	1.86	2.11	2.02	2.02	2.16	1.88		2.01	1.98	2.06	2.01	1.99		2	2.08	1.93	1.98	1.01	2.1	1.99		2.1	2.05	2.02	1.8	2.02	2.11		2.1	1.95	1.98	2.04	2		2.09	1.88	2.08	2.14	1.95	1.97	1.99		1.99	2.04	2.01
Lu175	0.279	0.003		0.312	0.234	0.297	0.292	0.284	0.28	0.27		0.275	0.284	0.277	0.288	0.272		0.282	0.274	0.274	0.287	0.47	0.281	0.275		0.257	0.283	0.274	0.326	0.281	0.262		0.275	0.278	0.288	0.265	0.289		0.261	0.28	0.291	0.293	0.298	0.256	0.279		0.287	0.287	0.268
Hf178	4.32	0.18		4.01	4.41	4.7	4.06	4.45	4.32	4.3		4.25	4.32	4.44	4.44	4.16		4.21	4.48	4.19	4.41	5.16	4.19	4.46		4.34	4.25	4.44	4.27	4.35	4.27		4.4	4.32	4.19	4.42	4.29		4.33	4.31	4.28	4.24	4.53	4.23	4.34		4.36	4.41	4.26
Ta181	1.15	0.1		1.195	1.126	1.138	1.143	1.153	1.123	1.181		1.153	1.125	1.19	1.2	1.09		1.104	1.183	1.147	1.2	1.28	1.15	1.12		1.175	1.149	1.12	1.138	1.19	1.129		1.14	1.189	1.114	1.136	1.18		1.17	1.139	1.127	1.14	1.201	1.118	1.164		1.138	1.209	1.11
Pb208	1.7	0.2		1.6	1.72	1.74	1.77	1.77	1.65	1.67		1.61	1.82	1.67	1.76	1.66		1.65	1.77	1.78	1.61	3.39	1.64	1.77		1.81	1.64	1.75	1.58	1.76	1.69		1.71	1.75	1.63	1.64	1.8		1.74	1.76	1.6	1.75	1.57	1.75	1.74		1.72	1.82	1.59
Th232	1.22	0.05		1.235	1.191	1.24	1.197	1.27	1.25	1.16		1.257	1.199	1.196	1.208	1.25		1.216	1.227	1.203	1.238	1.14	1.199	1.239		1.235	1.266	1.18	1.16	1.24	1.24		1.228	1.271	1.144	1.21	1.26		1.19	1.245	1.209	1.18	1.33	1.18	1.22		1.222	1.247	1.236
U238	0.403	0.003		0.387	0.397	0.423	0.406	0.404	0.403	0.399		0.382	0.417	0.423	0.384	0.411		0.401	0.403	0.407	0.403	0.21	0.408	0.396		0.404	0.399	0.391	0.423	0.436	0.373		0.39	0.415	0.407	0.394	0.409		0.399	0.419	0.387	0.406	0.407	0.387	0.42		0.401	0.399	0.381
(BHVO-2G: GeoReM, preferred values: 1/2009, Jochum (Max-Planck – Institut fuer Chemie); see Jochum et al., 2005)
Jochum K.P., Nohl U., Herwig K., Lammel E., Stoll B., Hofmann A.W. 2005. GeoReM: A New Geochemical Database for Reference Materials and Isotopic Standards. Geostandards and Geoanalytical Research, 29(3): 333‑338.
GLITTER!: 1 sigma error.
Element				BHVO	BHVO-1b	BHVO-1c	BHVO-1d	BHVO-1e	BHVO-1f	BHVO-1g		BHVO-1a	BHVO-1b	BHVO-1c	BHVO-1d	BHVO-1e		BHVO-1a	BHVO-1b	BHVO-1c	BHVO-1d	BHVO-1e	BHVO-1f	BHVO-1g		BHVO-1a	BHVO-1b	BHVO-1c	BHVO-1d	BHVO-1e	BHVO-1f		BHVO-2a	BHVO-2b	BHVO-2c	BHVO-2d	BHVO-2e		BHVO-2a	BHVO-2b	BHVO-2c	BHVO-2f	BHVO-2g	BHVO-2h	BHVO-2i		BHVO-2a	BHVO-2b	BHVO-2c
Li7				0.52	0.51	0.49	0.67	0.88	0.78	0.93		0.39	0.4	0.42	0.45	0.44		0.53	0.52	0.55	0.55	1.42	0.67	0.73		0.6	0.57	0.72	0.64	0.8	0.8		0.43	0.41	0.43	0.54	0.58		0.58	0.63	0.64	0.78	0.91	0.87	0.99		0.41	0.42	0.46
P31				152.07	154.69	152.27	156.25	154	153.76	152.95		162.15	168.23	161.86	165.75	165.19		162.88	160.06	160.68	166.92	133.23	166.35	169.75		174.13	174.81	167.29	173.08	193.1	194.16		141.16	137.2	142.05	146.37	146.27		144.38	142.18	150.12	156.88	154.33	155.8	160.81		142.75	141.73	144.98
Ca42				2711.14	2720.88	2712.2	2798.64	2969.5	2926.24	2967.22		2911.12	2978.15	3077.22	3545.85	3598.26		3122.62	3208.46	3449.75	3494.43	4598	3938.62	4144.8		2963.53	2976.18	3178.78	3124.75	3642.47	3650.17		2710.85	2669.47	2741.67	3040.75	3120.78		2900.73	2928.2	2916.75	3287.35	3386.61	3672.75	3688.33		2637.2	2607.8	2592.3
Sc45				1.29	1.27	1.25	1.31	1.46	1.48	1.48		1.53	1.47	1.65	2.09	2.15		1.32	1.36	1.45	1.53	1.62	1.74	1.76		1.42	1.39	1.5	1.59	1.95	1.95		1.45	1.46	1.53	2.1	2.17		1.41	1.38	1.49	1.78	1.74	1.99	2.11		1.22	1.19	1.21
Ti49				533.73	540	527.66	546.46	576.24	576.69	582.6		512.77	513.23	519.67	526.22	532.64		595.19	592.06	634.51	665.1	544.05	737.18	749.62		616.11	620.12	675.86	680.49	820.38	806.7		546.5	551.55	563.47	661.71	657.58		567.92	576.27	594.73	654.35	660.35	712.68	746.55		519.85	513.22	525.63
V51				10.22	10.37	10.15	10.68	11.24	11.25	11.41		10.93	11.23	12.06	13.5	13.8		11.54	11.43	12.62	13.1	14.66	14.63	15.32		13.35	13.31	14.96	14.66	18.8	18.6		10.57	10.79	11.3	13.37	13.21		11.14	11.43	11.65	12.97	13.01	14.31	15		10.55	10.41	10.83
Cr52				10.33	10.63	10.48	11.08	12.43	12.4	12.41		10.76	10.99	11.98	13.51	13.74		11.93	12.02	13.93	14.23	12.76	16.43	16.77		13.65	13.63	15.4	15.06	19.9	19.69		9.28	9.37	9.41	10.02	10.21		10.57	10.85	10.99	12.19	12.34	13.34	13.99		9.74	9.66	9.96
Mn55				43.54	44.46	43.59	45.84	50.24	49.85	50.45		42.8	43.42	45.14	47.88	48.64		59.74	59.94	73.35	74.77	65.57	91.23	90.85		49.54	49.71	53.06	53.07	65.02	64.52		41.44	41.6	41.68	44.85	45.3		53.34	54.8	57.42	65.43	68.08	75	79.83		45.42	44.27	46.03
Co59				1.52	1.56	1.55	1.64	1.76	1.79	1.79		1.46	1.48	1.51	1.59	1.61		3.05	3.03	3.94	4.18	3.79	5.16	4.99		1.82	1.86	1.96	2.05	2.51	2.49		1.48	1.51	1.52	1.73	1.72		1.87	1.89	2.02	2.25	2.34	2.6	2.76		1.62	1.6	1.68
Ni62				4.28	4.3	4.32	4.65	4.98	5	5.12		4.21	4.15	4.39	4.72	4.84		7.87	7.85	10.34	10.79	11.18	13.18	13.08		4.28	4.2	4.32	4.41	4.78	4.85		4.57	4.81	5.04	6.36	6.48		5.12	5.31	5.43	6.13	6.53	7.42	7.55		4.08	4.01	3.97
Cu65				4.67	4.69	4.75	4.86	5.45	5.5	5.48		4.86	5.04	5.26	6.03	6.2		7.94	7.91	10.25	10.7	13.88	12.86	13.03		5.26	5.34	5.74	5.64	6.96	7.05		5.48	5.85	6.26	8.36	8.6		5.65	5.79	5.9	6.97	6.96	8.23	8.63		4.95	4.8	4.94
Zn66				5.13	5.39	5.41	6.43	8.22	7.88	8.24		4.58	4.86	5.26	6.39	6.59		6.08	6.24	7.86	8.56	12.23	10.3	10.76		5.55	5.8	6.15	6.32	8.35	8.59		3.52	3.51	3.56	3.86	3.98		5.73	5.57	5.78	7.13	7.5	8.65	9.41		3.51	3.46	3.49
Ga71				0.78	0.79	0.78	0.81	0.9	0.89	0.91		0.86	0.88	0.95	1.1	1.15		1.32	1.37	1.76	1.82	2.09	2.19	2.31		1.01	1.06	1.14	1.17	1.49	1.48		0.84	0.88	0.91	1.12	1.13		1.01	1.01	1.06	1.23	1.28	1.43	1.55		0.77	0.76	0.79
Rb85				0.4	0.42	0.41	0.46	0.56	0.55	0.58		0.51	0.54	0.6	0.77	0.83		0.37	0.39	0.42	0.43	0.73	0.5	0.52		0.41	0.41	0.43	0.44	0.55	0.54		0.4	0.41	0.43	0.56	0.57		0.49	0.5	0.53	0.63	0.68	0.76	0.83		0.3	0.3	0.3
Sr88				14.88	15.03	14.85	15.85	19.26	18.97	19.62		13.34	13.46	13.86	15.68	16.04		16.31	16.61	18.34	19.7	18.5	23.26	23.79		17.09	17.41	18.97	19.3	24.95	24.32		15.16	15.54	16.12	20.93	20.91		16.33	17	17.62	20.19	20.82	23.78	25.1		12.64	12.43	12.43
Y89				1.12	1.15	1.11	1.21	1.46	1.52	1.55		1.23	1.23	1.36	1.78	1.89		1.12	1.16	1.29	1.38	1.73	1.63	1.68		1.04	1.06	1.13	1.15	1.44	1.42		1.4	1.46	1.54	2.29	2.27		1.22	1.25	1.28	1.55	1.59	1.85	2		1	0.98	0.97
Zr90				6.19	6.18	6.13	6.33	7.25	7.28	7.43		7.21	7.28	7.88	10.05	10.47		6.48	6.71	7.36	7.69	7.53	8.92	9.01		6.89	7.12	7.71	7.94	10.09	9.93		7.61	7.9	8.29	11.61	11.67		8.21	8.33	8.79	10.85	10.75	12.57	13.82		6.7	6.5	6.44
Nb93				0.76	0.77	0.76	0.81	1	0.98	1.01		0.59	0.59	0.6	0.6	0.6		0.72	0.71	0.79	0.83	1.11	0.96	0.96		0.81	0.84	0.89	0.94	1.17	1.17		0.65	0.66	0.68	0.8	0.79		0.78	0.79	0.8	0.95	0.96	1.1	1.17		0.64	0.63	0.63
Mo95				0.27	0.29	0.27	0.3	0.35	0.36	0.36		0.26	0.25	0.27	0.31	0.33		0.25	0.26	0.29	0.29	1.39	0.35	0.34		0.61	0.61	0.63	0.68	1.11	1		0.25	0.25	0.27	0.32	0.33		0.42	0.46	0.51	0.59	0.56	0.76	0.76		0.27	0.26	0.28
Sn118				0.28	0.25	0.26	0.29	0.36	0.38	0.38		0.27	0.29	0.34	0.51	0.46		0.3	0.29	0.38	0.41	0.84	0.45	0.52		0.19	0.19	0.21	0.2	0.25	0.26		0.26	0.27	0.26	0.38	0.4		0.36	0.42	0.47	0.65	0.53	0.67	0.73		0.2	0.2	0.21
Sb121				0.085	0.11	0.13	0.11	0.12	0.15	0.19		0.097	0.091	0.17	0.15	0.18		0.092	0.1	0.098	0.1	0.1	0.15	0.11		0.088	0.079	0.098	0.12	0.12	0.11		0.14	0.26	0.13	0.24	0.21		0.097	0.22	0.28	0.28	0.22	0.35	0.43		0.071	0.064	0.059
Cs133				0.012	0.012	0.011	0.012	0.013	0.013	0.013		0.016	0.018	0.023	0.026	0.027		0.015	0.017	0.023	0.025	<0.00	0.028	0.029		0.025	0.022	0.023	0.027	0.031	0.04		0.013	0.012	0.012	0.015	0.014		0.021	0.024	0.027	0.032	0.026	0.044	0.039		0.0098	0.011	0.01
Ba137				5.38	5.56	5.38	5.9	7.39	7.31	7.51		4.52	4.56	4.74	5.25	5.46		5.06	5.01	5.59	5.85	12.14	6.61	6.87		6.65	6.76	7.22	7.62	10.03	10.06		4.8	4.83	5.05	6.04	5.91		5.2	5.4	5.64	6.43	6.54	7.31	7.7		4.67	4.63	4.6
La139				0.57	0.58	0.58	0.61	0.7	0.71	0.74		0.65	0.65	0.7	0.9	0.94		0.64	0.65	0.76	0.77	1.54	0.9	0.93		0.58	0.59	0.61	0.63	0.77	0.76		0.52	0.53	0.53	0.62	0.62		0.72	0.77	0.78	0.94	0.99	1.1	1.17		0.66	0.65	0.63
Ce140				1.26	1.26	1.28	1.35	1.46	1.45	1.47		1.27	1.28	1.34	1.47	1.53		1.64	1.68	2	2.07	4.12	2.47	2.5		1.45	1.5	1.57	1.6	1.97	2		1.45	1.48	1.55	1.96	1.92		1.43	1.48	1.53	1.72	1.77	1.94	2.03		1.31	1.3	1.29
Pr141				0.22	0.22	0.21	0.23	0.27	0.27	0.27		0.2	0.2	0.21	0.24	0.24		0.28	0.28	0.35	0.36	0.9	0.44	0.43		0.3	0.3	0.32	0.35	0.46	0.47		0.25	0.25	0.26	0.36	0.37		0.25	0.26	0.27	0.32	0.33	0.36	0.4		0.23	0.23	0.23
Nd146				1.15	1.12	1.15	1.22	1.49	1.46	1.51		0.92	0.93	0.95	1.05	1.05		0.97	0.98	1.05	1.08	4	1.19	1.24		1.48	1.51	1.66	1.71	2.29	2.48		1.25	1.29	1.34	1.88	1.9		1.2	1.24	1.26	1.53	1.57	1.71	1.84		1.33	1.28	1.28
Sm149				0.46	0.48	0.46	0.59	0.73	0.69	0.72		0.58	0.57	0.76	0.91	1.07		0.4	0.43	0.49	0.48	1.85	0.62	0.66		0.71	0.75	0.76	0.88	1.2	1.32		0.3	0.3	0.3	0.37	0.38		0.42	0.41	0.44	0.54	0.59	0.64	0.71		0.3	0.29	0.31
Eu151				0.13	0.13	0.14	0.14	0.17	0.18	0.19		0.11	0.11	0.12	0.15	0.15		0.12	0.12	0.13	0.14	0.46	0.16	0.16		0.15	0.14	0.16	0.18	0.21	0.23		0.15	0.16	0.16	0.24	0.24		0.16	0.18	0.18	0.22	0.24	0.26	0.29		0.11	0.11	0.1
Gd157				0.44	0.41	0.43	0.49	0.58	0.6	0.58		0.59	0.67	0.76	1.07	1		0.38	0.41	0.44	0.46	1.73	0.54	0.55		0.51	0.49	0.55	0.62	0.82	0.87		0.5	0.49	0.51	0.78	0.8		0.61	0.6	0.71	0.87	0.86	0.91	1.04		0.3	0.32	0.31
Tb159				0.088	0.079	0.083	0.1	0.13	0.12	0.14		0.071	0.075	0.079	0.11	0.11		0.082	0.086	0.098	0.11	0.21	0.14	0.13		0.055	0.054	0.057	0.06	0.074	0.075		0.067	0.068	0.072	0.11	0.11		0.07	0.068	0.071	0.096	0.092	0.1	0.11		0.047	0.048	0.047
Dy161				0.3	0.3	0.29	0.33	0.36	0.37	0.37		0.4	0.38	0.45	0.58	0.64		0.29	0.29	0.31	0.33	0.99	0.38	0.39		0.32	0.32	0.34	0.37	0.48	0.48		0.32	0.33	0.34	0.48	0.51		0.37	0.38	0.4	0.51	0.53	0.57	0.66		0.31	0.32	0.31
Ho165				0.086	0.081	0.081	0.096	0.12	0.12	0.13		0.077	0.072	0.086	0.12	0.12		0.059	0.062	0.067	0.07	0.19	0.085	0.089		0.07	0.067	0.073	0.081	0.1	0.1		0.095	0.1	0.1	0.16	0.17		0.079	0.081	0.079	0.11	0.11	0.12	0.14		0.049	0.047	0.047
Er166				0.28	0.31	0.28	0.31	0.48	0.43	0.45		0.16	0.16	0.18	0.21	0.22		0.22	0.24	0.29	0.27	0.75	0.35	0.36		0.33	0.29	0.33	0.36	0.53	0.55		0.25	0.27	0.27	0.43	0.47		0.2	0.19	0.2	0.24	0.25	0.29	0.33		0.18	0.17	0.17
Tm169				0.044	0.044	0.043	0.05	0.055	0.069	0.066		0.049	0.043	0.058	0.067	0.076		0.045	0.056	0.063	0.06	0.23	0.079	0.085		0.037	0.036	0.037	0.041	0.052	0.053		0.035	0.037	0.036	0.055	0.053		0.041	0.045	0.047	0.063	0.059	0.066	0.083		0.022	0.023	0.023
Yb172				0.23	0.21	0.23	0.26	0.32	0.35	0.31		0.15	0.15	0.16	0.18	0.18		0.17	0.17	0.19	0.2	0.62	0.25	0.24		0.25	0.24	0.28	0.26	0.38	0.41		0.15	0.14	0.14	0.17	0.17		0.2	0.18	0.2	0.25	0.23	0.27	0.28		0.13	0.13	0.13
Lu175				0.048	0.037	0.046	0.055	0.068	0.069	0.068		0.023	0.024	0.026	0.031	0.03		0.023	0.022	0.023	0.024	0.17	0.026	0.026		0.04	0.044	0.051	0.063	0.076	0.074		0.022	0.022	0.024	0.029	0.032		0.029	0.03	0.034	0.043	0.045	0.046	0.051		0.022	0.022	0.021
Hf178				0.41	0.44	0.46	0.47	0.63	0.62	0.63		0.3	0.31	0.35	0.43	0.41		0.31	0.33	0.37	0.4	1.52	0.48	0.52		0.27	0.26	0.28	0.28	0.32	0.33		0.24	0.24	0.24	0.31	0.31		0.26	0.25	0.26	0.3	0.32	0.34	0.36		0.22	0.22	0.21
Ta181				0.071	0.067	0.066	0.075	0.087	0.086	0.092		0.086	0.084	0.1	0.13	0.13		0.08	0.086	0.096	0.1	0.31	0.12	0.12		0.073	0.071	0.076	0.08	0.1	0.1		0.065	0.068	0.068	0.09	0.095		0.066	0.064	0.067	0.081	0.086	0.093	0.099		0.061	0.065	0.061
Pb208				0.11	0.12	0.12	0.14	0.18	0.17	0.18		0.15	0.16	0.18	0.24	0.23		0.15	0.16	0.19	0.18	0.7	0.23	0.26		0.18	0.16	0.2	0.19	0.29	0.29		0.12	0.13	0.14	0.19	0.22		0.15	0.15	0.15	0.2	0.19	0.24	0.25		0.12	0.13	0.11
Th232				0.083	0.079	0.081	0.09	0.11	0.11	0.11		0.074	0.071	0.078	0.096	0.1		0.06	0.061	0.065	0.068	0.28	0.076	0.079		0.092	0.094	0.1	0.1	0.14	0.14		0.09	0.093	0.095	0.14	0.15		0.093	0.097	0.1	0.12	0.14	0.14	0.15		0.071	0.073	0.073
U238				0.028	0.028	0.029	0.031	0.034	0.035	0.035		0.037	0.04	0.047	0.055	0.061		0.025	0.025	0.026	0.026	0.1	0.029	0.028		0.045	0.044	0.051	0.057	0.079	0.07		0.025	0.026	0.027	0.032	0.034		0.03	0.031	0.03	0.037	0.037	0.04	0.044		0.04	0.04	0.039
GLITTER!: Minimum detection limits (99% confidence).
Element				BHVO	BHVO-1b	BHVO-1c	BHVO-1d	BHVO-1e	BHVO-1f	BHVO-1g		BHVO-1a	BHVO-1b	BHVO-1c	BHVO-1d	BHVO-1e		BHVO-1a	BHVO-1b	BHVO-1c	BHVO-1d	BHVO-1e	BHVO-1f	BHVO-1g		BHVO-1a	BHVO-1b	BHVO-1c	BHVO-1d	BHVO-1e	BHVO-1f		BHVO-2a	BHVO-2b	BHVO-2c	BHVO-2d	BHVO-2e		BHVO-2a	BHVO-2b	BHVO-2c	BHVO-2f	BHVO-2g	BHVO-2h	BHVO-2i		BHVO-2a	BHVO-2b	BHVO-2c
Li7				0.188	0.215	0.189	0.112	0.133	0.118	0.13		0.118	0.155	0.104	0.088	0.0707		0.112	0.12	0.0899	0.163	<0.00000	0.0681	0.0724		0.156	0.091	0.0646	0.0939	0.0906	0.0598		0.112	0.194	0.148	0.139	0.147		0.24	0.219	0.131	0.155	0.168	0.174	0.154		0.204	0.213	5.24
P31				4.66	4.59	3.93	4.36	4.01	3.63	3.68		4.49	4.4	4.32	4.23	4.28		4.07	4.29	4.75	4.65	10.23	4.82	4.68		5.33	4.43	4.3	4.56	4.46	4.46		6.91	7.05	5.91	6.35	6.09		7.32	6.77	6.36	6.76	6.35	6.35	6.83		5.54	5.49	52.78
Ca42				68.5	67.07	57.44	62.42	55.43	51.24	49.43		47.58	48.43	45.74	46.44	48.65		56.16	56.22	56.76	57.23	108.25	53.39	52.37		55.63	49.43	45.1	47.54	46.27	45.14		58.85	60.78	48.28	49.81	51.34		55.06	52.24	49.91	49.46	48.58	48.52	51.94		53.16	52.94	0.0875
Sc45				0.128	0.125	0.103	0.116	0.114	0.116	0.115		0.119	0.134	0.124	0.122	0.125		0.0942	0.105	0.106	0.119	0.228	0.109	0.108		0.129	0.107	0.108	0.118	0.119	0.112		0.0958	0.0985	0.0718	0.0896	0.077		0.0969	0.101	0.0885	0.104	0.0842	0.0895	0.0919		0.0879	0.0888	0.305
Ti49				0.191	0.402	0.278	0.385	0.3	0.437	0.277		0.188	0.275	0.375	0.277	0.515		0.383	0.599	0.349	0.264	0.847	0.254	0.332		0.247	0.222	0.406	0.272	0.279	0.352		0.367	0.429	0.38	0.626	0.351		0.422	0.622	0.327	0.426	0.391	0.438	0.816		0.121	0.206	0.0445
V51				0.0495	0.0384	0.0319	0.0352	0.0334	0.0368	0.0334		0.0382	0.0392	0.0399	0.0365	0.0369		0.0457	0.0526	0.0415	0.0394	0.0988	0.0413	0.0428		0.0525	0.0471	0.0476	0.0419	0.0335	0.0359		0.0403	0.0403	0.0341	0.0393	0.0346		0.043	0.0361	0.0469	0.0398	0.048	0.0321	0.0465		0.0427	0.0406	0.568
Cr52				0.874	0.859	0.741	0.834	0.755	0.706	0.695		0.843	0.839	0.832	0.84	0.868		0.889	0.941	0.988	0.987	2.11	0.972	1		1.07	0.939	0.909	0.948	0.934	0.913		0.697	0.714	0.614	0.694	0.651		0.759	0.745	0.672	0.704	0.659	0.628	0.702		0.604	0.578	0.0941
Mn55				0.172	0.174	0.153	0.17	0.179	0.163	0.168		0.189	0.19	0.186	0.191	0.188		0.15	0.162	0.199	0.196	0.397	0.2	0.207		0.23	0.196	0.194	0.206	0.204	0.201		0.119	0.115	0.105	0.126	0.11		0.124	0.13	0.12	0.124	0.118	0.121	0.136		0.0962	0.088	0.00992
Co59				0.014	0.00804	<0.00000	0.0136	0.0122	0.0118	0.0131		0.0121	0.0162	0.0121	0.00734	<0.00000		0.0111	0.017	0.0152	<0.00000	0.0571	0.0121	0.0184		<0.00000	<0.00000	0.0112	0.0201	0.0084	0.0177		<0.00000	<0.00000	0.00887	0.00994	0.0137		0.0194	0.0112	0.0148	0.0155	0.0142	0.0146	0.0153		0.0104	0.00722	0.0342
Ni62				0.0693	0.0888	0.0337	0.0547	0.0492	0.0335	0.0557		0.0346	0.0509	0.105	0.0639	0.0385		0.0394	0.0739	0.0443	0.0444	<0.00000	0.0979	0.0938		0.0686	0.0873	0.057	0.0723	0.0749	0.0576		<0.00000	0.0913	0.0614	0.098	<0.00000		0.119	0.0919	<0.00000	0.0908	0.0833	0.0495	0.0518		0.0622	0.061	0.0609
Cu65				0.0486	0.123	0.0409	0.0808	0.0588	0.0401	0.0272		0.0428	0.0628	0.0425	0.0543	0.073		0.0489	0.0649	0.0671	0.0673	<0.00000	0.054	0.0819		0.0963	0.0671	0.0506	0.0371	0.0543	0.0362		0.072	0.0627	0.0639	0.0422	0.0711		0.109	<0.00000	0.0726	0.0891	0.0818	0.0947	0.0444		0.0641	0.083	0.184
Zn66				0.185	0.146	0.131	0.176	0.136	0.132	0.127		0.148	0.161	0.142	0.155	0.18		0.209	0.152	0.223	0.176	0.512	0.134	0.136		0.175	0.209	0.132	0.154	0.173	0.157		0.185	0.197	0.125	0.167	0.191		0.202	0.202	0.247	0.175	0.188	0.195	0.242		0.227	0.171	0.0215
Ga71				0.0275	0.0158	0.0189	0.0265	0.0217	0.0209	0.0179		0.0228	0.0183	0.0204	0.0107	0.0193		0.0196	0.03	0.0257	<0.00000	0.0854	0.0257	0.0195		0.0245	0.0127	0.0328	0.0268	0.0213	0.0115		0.0129	0.0195	0.0195	0.0281	0.0122		0.0277	0.0139	0.0185	0.0139	0.0285	0.0228	0.0276		0.0206	0.0128	0.0129
Rb85				0.0147	0.0146	0.0132	0.0151	0.00952	0.00917	0.0139		0.0131	0.00678	0.0145	0.0117	0.014		0.0118	0.0127	0.0101	0.0131	0.0269	0.0128	0.0106		<0.00000	0.0131	0.0117	0.00761	0.00753	0.00864		0.0132	0.0174	0.0119	0.0129	0.0158		0.0232	0.0151	0.0155	0.0145	0.0146	0.017	0.0145		0.0132	0.014	0.00456
Sr88				0.00875	0.00501	0.00425	0.0097	0.00433	0.0059	0.00694		0.00925	0.0043	0.00417	0.00761	0.00649		<0.00000	0.014	0.00508	0.00509	<0.00000	0.00497	0.00921		<0.00000	0.00716	0.0092	0.0106	0.00483	0.00642		0.00374	0.0105	0.00647	0.00619	0.00347		0.00551	0.0103	0.0052	0.0103	0.00714	0.025	0.0173		0.00277	0.00271	0.00288
Y89				0.0117	<0.00000	0.00979	0.00786	<0.00000	0.00951	0.00911		0.00835	0.00615	0.0147	0.00643	0.00951		0.00906	<0.00000	0.0101	0.0101	<0.00000	0.0057	0.00611		0.00901	<0.00000	0.00529	0.00548	0.00568	0.00535		0.00398	0.00599	0.00346	<0.00000	0.00648		0.00409	0.00409	<0.00000	0.00418	0.00542	<0.00000	0.0042		0.00303	0.00297	<0.00000
Zr90				0.0223	0.0156	0.0265	0.0258	0.0228	0.0219	0.0121		<0.00000	0.0166	0.0198	0.0171	0.0179		0.0146	0.0112	0.02	<0.00000	<0.00000	0.0161	0.0172		<0.00000	0.0192	0.0103	0.0151	0.0112	0.0106		<0.00000	0.0148	0.00985	<0.00000	0.00754		0.0143	0.0117	<0.00000	<0.00000	0.00772	<0.00000	0.0119		0.00609	0.00597	0.00377
Nb93				0.00671	0.00665	0.00797	0.00908	0.014	0.00779	0.00528		0.00765	0.00795	0.00545	0.00813	0.0104		<0.00000	0.0115	0.012	<0.00000	<0.00000	<0.00000	<0.00000		0.00741	0.00667	0.00611	0.011	<0.00000	0.00612		0.00537	0.00808	0.00923	0.00878	<0.00000		0.00547	0.00774	0.00733	0.00781	0.00878	0.00526	0.00552		0.00687	0.00389	0.0361
Mo95				<0.00000	0.0477	0.0572	0.0329	0.0419	<0.00000	0.0274		<0.00000	0.0432	<0.00000	0.03	0.0442		0.034	0.0521	<0.00000	0.0387	<0.00000	<0.00000	0.0826		<0.00000	0.037	<0.00000	0.0506	<0.00000	0.0355		0.028	0.0517	<0.00000	0.0273	0.0266		0.0417	<0.00000	0.0395	0.0515	0.0386	0.0283	0.0297		0.0383	0.0305	0.21
Sn118				0.317	0.311	0.271	0.314	0.281	0.262	0.258		0.218	0.216	0.235	0.246	0.279		0.231	0.242	0.246	0.261	0.634	0.247	0.245		0.236	0.206	0.219	0.218	0.253	0.232		0.216	0.231	0.21	0.21	0.198		0.246	0.231	0.218	0.229	0.223	0.221	0.237		0.229	0.224	0.0405
Sb121				0.0545	0.0454	0.0171	0.0449	0.0269	0.0257	0.0317		0.0388	0.0405	0.0284	0.0576	0.0645		0.0651	0.0695	0.0907	0.0635	0.271	0.057	0.0427		0.0833	0.0488	0.0563	0.0581	0.0259	0.0485		0.104	0.115	0.0467	0.0377	0.0444		0.0403	0.044	0.0386	0.0528	0.0348	0.0334	0.0252		0.0495	0.0593	0.00348
Cs133				0.00572	0.00734	0.00394	0.00649	0.00295	0.00492	0.00273		0.00584	0.00429	0.00335	0.00348	0.00362		0.00314	<0.00000	0.00534	<0.00000	<0.00000	0.00692	0.00747		0.00409	0.00365	<0.00000	0.0033	0.00322	0.00301		0.00537	0.00566	0.00424	0.00245	<0.00000		0.0043	0.00528	0.00409	0.00535	<0.00000	0.00417	0.00537		<0.00000	<0.00000	0.0183
Ba137				0.0432	0.0303	0.0445	0.0511	0.0265	0.0256	0.0245		0.0363	0.0267	0.0446	0.054	<0.00000		0.0666	0.0558	<0.00000	<0.00000	<0.00000	0.0461	<0.00000		0.0362	<0.00000	0.0418	0.0306	0.0539	<0.00000		0.0443	<0.00000	0.0213	<0.00000	0.0219		0.0253	0.0253	<0.00000	0.0254	<0.00000	0.0242	0.0254		<0.00000	0.0268	<0.00000
La139				<0.00000	0.00687	<0.00000	<0.00000	0.0042	0.00404	0.00388		0.00526	0.00548	0.00381	0.00707	0.00603		0.00804	0.00434	<0.00000	<0.00000	<0.00000	0.00434	0.00464		<0.00000	<0.00000	<0.00000	0.00418	0.00617	0.00582		0.00336	<0.00000	0.00402	<0.00000	0.00516		<0.00000	0.00338	<0.00000	0.00335	0.00307	0.00316	<0.00000		<0.00000	<0.00000	<0.00000
Ce140				<0.00000	0.00588	<0.00000	<0.00000	0.0036	0.00347	0.00744		0.00342	0.00356	0.0049	0.00367	0.00857		0.00399	0.00432	<0.00000	0.00634	0.0208	0.00442	<0.00000		0.00479	<0.00000	0.00687	<0.00000	<0.00000	0.00399		0.00342	0.00364	0.00289	0.00538	0.00425		0.00343	0.00594	0.00558	0.00339	0.00311	0.0032	<0.00000		0.0026	0.0036	<0.00000
Pr141				<0.00000	0.00361	0.00306	<0.00000	0.00313	0.00522	<0.00000		0.00518	<0.00000	<0.00000	0.00452	0.00334		<0.00000	0.00367	0.00377	0.00655	<0.00000	<0.00000	0.00396		0.00404	<0.00000	0.00473	<0.00000	<0.00000	<0.00000		0.00388	0.00292	<0.00000	0.00262	<0.00000		0.00288	<0.00000	0.00467	0.0049	<0.00000	0.00267	<0.00000		<0.00000	0.00298	<0.00000
Nd146				<0.00000	0.0483	0.0289	0.0464	<0.00000	0.028	0.0269		0.0276	0.0406	0.0391	0.041	0.0302		0.0293	<0.00000	0.0329	0.0466	0.153	<0.00000	0.0492		0.0343	<0.00000	0.0289	0.0424	0.0445	<0.00000		<0.00000	0.0247	0.0346	0.0221	<0.00000		<0.00000	0.0421	<0.00000	0.0339	0.022	<0.00000	0.0237		<0.00000	0.0359	<0.00000
Sm149				<0.00000	0.03	<0.00000	0.0298	0.0272	<0.00000	0.0252		<0.00000	<0.00000	0.0339	<0.00000	0.0387		<0.00000	0.048	<0.00000	0.0497	0.133	0.0282	0.0302		<0.00000	0.0463	0.0432	<0.00000	0.0273	0.0257		<0.00000	0.029	0.0165	<0.00000	0.0175		0.0192	0.0193	0.0263	<0.00000	0.0187	<0.00000	0.0294		<0.00000	0.0263	0.00455
Eu151				0.012	0.00839	0.01	0.008	<0.00000	0.0096	0.0092		0.0123	<0.00000	0.00715	<0.00000	0.0158		0.00803	<0.00000	0.0087	<0.00000	<0.00000	0.00834	0.0089		<0.00000	0.00838	<0.00000	0.0113	0.0083	0.00781		<0.00000	<0.00000	<0.00000	<0.00000	0.00551		0.00866	0.00612	<0.00000	<0.00000	0.00972	<0.00000	0.00608		0.00482	0.00666	0.0185
Gd157				<0.00000	0.0582	0.0495	0.0579	0.0529	<0.00000	0.0492		<0.00000	0.051	<0.00000	0.0646	0.0389		0.0339	0.0517	<0.00000	<0.00000	<0.00000	<0.00000	0.0379		<0.00000	<0.00000	<0.00000	<0.00000	<0.00000	<0.00000		0.0349	0.0371	0.0303	<0.00000	<0.00000		<0.00000	0.0263	<0.00000	<0.00000	<0.00000	<0.00000	<0.00000		0.0195	<0.00000	0.00247
Tb159				0.00848	0.0119	<0.00000	0.0101	0.00742	<0.00000	0.00486		0.00494	<0.00000	0.00495	0.00733	0.00764		0.00455	0.00694	0.00701	0.00496	<0.00000	<0.00000	0.00722		0.00507	0.00458	0.00612	<0.00000	0.0048	0.00454		0.00436	0.00328	<0.00000	<0.00000	0.00295		0.00466	0.00466	0.0031	<0.00000	0.00301	0.00311	0.00566		0.00261	<0.00000	0.0129
Dy161				0.0348	0.0244	0.0463	<0.00000	<0.00000	<0.00000	0.028		<0.00000	<0.00000	0.0199	0.0298	0.022		0.0179	0.0193	<0.00000	<0.00000	<0.00000	<0.00000	0.0197		0.02	<0.00000	<0.00000	<0.00000	0.0193	0.0183		0.0119	<0.00000	0.0104	<0.00000	0.0113		<0.00000	0.0172	<0.00000	<0.00000	0.0162	<0.00000	<0.00000		<0.00000	0.00944	<0.00000
Ho165				0.00921	0.00647	0.00951	0.00634	0.00573	0.00781	<0.00000		0.00475	<0.00000	0.00493	0.00759	0.00795		0.00449	<0.00000	0.00505	<0.00000	<0.00000	0.005	0.00536		0.00948	<0.00000	<0.00000	0.00673	<0.00000	<0.00000		0.00311	<0.00000	<0.00000	0.00299	0.00291		0.00551	0.00711	0.00426	0.00321	<0.00000	0.00306	<0.00000		<0.00000	<0.00000	<0.00000
Er166				0.0281	<0.00000	<0.00000	<0.00000	<0.00000	0.016	<0.00000		0.0261	0.0222	0.0216	0.023	<0.00000		0.0137	0.0148	<0.00000	<0.00000	<0.00000	0.0202	<0.00000		0.0158	<0.00000	0.0191	0.0198	0.015	<0.00000		<0.00000	<0.00000	0.00802	0.00902	<0.00000		0.00968	<0.00000	<0.00000	0.0136	<0.00000	0.00915	0.00959		<0.00000	0.00746	<0.00000
Tm169				<0.00000	0.00903	0.0054	<0.00000	0.00538	0.00518	0.00702		0.00691	<0.00000	0.00686	0.00504	0.00525		<0.00000	0.00716	0.00894	0.00731	<0.00000	0.00709	<0.00000		0.00566	0.00882	0.00469	0.00486	<0.00000	<0.00000		<0.00000	<0.00000	<0.00000	0.00416	0.00285		<0.00000	0.00314	0.00298	<0.00000	<0.00000	0.00305	<0.00000		<0.00000	0.00248	<0.00000
Yb172				0.048	0.0476	<0.00000	<0.00000	0.0299	0.0577	<0.00000		<0.00000	0.0381	0.0277	<0.00000	0.0469		<0.00000	<0.00000	0.0399	<0.00000	0.132	0.0396	<0.00000		<0.00000	<0.00000	<0.00000	<0.00000	0.0389	<0.00000		0.0195	0.0206	<0.00000	0.0167	<0.00000		<0.00000	<0.00000	0.0181	0.0186	0.017	0.0243	<0.00000		<0.00000	<0.00000	0.00242
Lu175				0.00603	0.00599	<0.00000	0.00592	0.0108	<0.00000	0.00706		0.00447	<0.00000	0.00818	0.00523	0.0055		0.00465	<0.00000	<0.00000	0.00491	<0.00000	0.00462	0.00697		0.00876	0.00458	0.00439	0.00648	<0.00000	0.00475		<0.00000	<0.00000	0.00262	<0.00000	<0.00000		0.00303	0.00304	0.00292	0.00318	<0.00000	0.00308	0.00458		0.00257	0.00251	<0.00000
Hf178				<0.00000	0.0417	0.05	0.0398	<0.00000	<0.00000	0.0324		<0.00000	0.0335	0.0467	0.0502	<0.00000		0.0275	0.0298	0.0315	0.0317	<0.00000	<0.00000	<0.00000		0.0481	0.0307	<0.00000	<0.00000	0.0317	0.0299		0.0194	0.0207	<0.00000	<0.00000	<0.00000		<0.00000	0.0208	0.0198	<0.00000	<0.00000	<0.00000	0.0215		0.0229	<0.00000	<0.00000
Ta181				0.00786	0.00781	0.00939	<0.00000	0.0071	<0.00000	0.00659		0.00457	<0.00000	0.0046	0.00484	0.00715		<0.00000	0.00514	<0.00000	<0.00000	<0.00000	<0.00000	<0.00000		<0.00000	0.00697	0.00455	<0.00000	0.00488	0.0046		<0.00000	<0.00000	<0.00000	<0.00000	0.0032		0.00497	0.00352	<0.00000	0.00368	0.00479	<0.00000	0.00375		0.00399	<0.00000	0.0131
Pb208				0.0136	0.0111	0.0105	0.0121	0.0129	0.00666	0.00904		0.00916	0.00947	0.0051	0.00515	0.0107		0.0216	0.0157	0.00706	0.0122	0.0319	0.0135	0.0125		0.0149	0.00672	0.0109	0.0113	0.0118	0.0111		0.013	0.0126	0.0104	0.0118	0.0103		<0.00000	0.00552	0.0116	0.00768	0.00704	0.0102	0.0131		0.0122	0.011	0.00455
Th232				0.00596	<0.00000	<0.00000	0.00577	<0.00000	0.005	<0.00000		0.00478	0.00497	<0.00000	0.00506	0.00528		0.0064	<0.00000	<0.00000	<0.00000	<0.00000	0.00717	<0.00000		<0.00000	0.0073	<0.00000	<0.00000	0.00506	0.00825		0.00349	<0.00000	0.00299	0.00464	0.0045		<0.00000	0.00353	<0.00000	0.00347	<0.00000	0.00565	0.00342		<0.00000	<0.00000	0.00229
U238				0.0037	0.00366	0.00439	0.00496	0.00439	0.00299	0.00405		0.00454	0.00334	0.00321	0.00335	0.0035		<0.00000	0.00421	0.00425	<0.00000	<0.00000	<0.00000	0.00438		<0.00000	0.00412	0.00388	<0.00000	<0.00000	<0.00000		0.00293	<0.00000	0.00254	0.00282	0.00388		<0.00000	0.00299	<0.00000	0.00284	<0.00000	0.00264	<0.00000		<0.00000	<0.00000
[truncated: 3 more columns]

## Sheet: SD2. qual.control std.
Quality-control standards
All values are reported in ppm
Trace Element Concentrations (MDL filtered).
run			1	1	2	3	3	4	4	5	5	6	6	6	7	7	7
sample	BIR-1- Ref. Value		117	117	163	41	41	58	58	165	165	30	30	30	180	180	180	Average
Element	Conc.	(2-sigma)	BIR-1a	BIR-1b	BIR-2G	BIR-1b	BIR-1c	BIR-1a	BIR-1b	BIR-1a	BIR-1b	BIR-1a	BIR-1b	BIR-1c	BIR-2a	BIR-1b	BIR-1d	n=15	2SD
Li7	3.203	0.069	3.08	3.21	2.73	2.71	3.06	3.17	2.9	2.99	3.49	3.04	3.14	2.56	3.56	3.64	2.93	3.08067	0.617713
P31	117.828	13.092	96.88	102.75	92.79	92.1	94.04	91.88	94.47	103.27	110.89	106.25	105.8	107.13	115.94	117.82	108.15	102.677	17.2965
Ca42	95055.1	1429.4	91255.9	90592.2	91909.3	86832.1	86038	89393.5	91883.8	92562.5	92161.4	93811.5	93208.6	92660.1	92963.8	93535.3	92894.6	91446.8	4678.83
Sc45	43.21	0.59	41.72	40.34	43.97	32.55	32.26	34.98	36.96	37.84	37.37	37.18	38.57	37.97	37.17	35.88	37.81	37.5047	6.11244
Ti49	5400	200	5459.06	5484.08	5531.87	5293.32	5205.48	5340.95	5470.59	5605.93	5688.57	5778.84	5843.6	5853.63	5573.44	5580.9	5540.36	5550.04	378.802
V51	320.6	2.9	304.82	306.02	305.73	304.88	309.15	309.14	307.87	309.67	315.71	316.61	320.82	321.45	311.4	315.75	307.48	311.1	11.224
Cr52	392.9	3.9	387.36	384.34	380.29	386.46	381.28	386.23	389.66	387.1	396.33	394.44	399.41	399.43	395.59	392	387.19	389.807	12.2409
Mn55	1340.66	12.392	1341.86	1336.11	1305.26	1299.9	1280.81	1304.65	1318.37	1305.2	1336.24	1339.79	1357.19	1357.47	1335.14	1313.21	1317.71	1323.26	44.4503
Co59	52.22	0.57	51.04	51.82	49.85	50.91	49.71	50.93	50.84	50.62	51.56	52.97	54.05	53.15	51.33	50.54	51.27	51.3727	2.40673
Ni62	168.9	1.9	165.72	165.06	163.24	167.1	161.52	164.99	168	161.63	170.98	169.35	170.06	170.43	172.87	167.9	167.25	167.073	6.78648
Cu65	120.7	1.6	127.46	125.88	119.32	126.67	121.8	128.12	127.38	120.58	125.59	123.61	124.55	123.78	136.76	127.92	131.54	126.064	8.679
Zn66	70.4	1.1	70.81	67.78	63.4	67.98	67.99	71.61	70.66	72.35	72.17	71.66	69.68	76.54	71.8	75.02	71.68	70.742	6.30551
Ga71	15.46	0.23	15.39	15.6	15.56	15.64	15.28	15.77	15.86	15.29	16.05	15.77	16.17	15.73	16.29	16.46	16.57	15.8287	0.808486
Rb85	0.21	0.0081	0.227	0.178	0.176	0.19	0.177	0.185	0.191	0.2	0.172	0.187	0.168	0.227	0.21	0.179	0.194	0.190733	0.0367188
Sr88	108.6	0.7	104.68	105.41	104.42	99.4	95.49	101.17	99.6	104.85	105.57	108.55	109.53	107.22	107.76	106.22	106	104.391	7.7309
Y89	15.6	0.17	14.14	13.6	14.91	9.99	9.82	11.08	11.64	11.1	11.2	11.19	10.96	11.45	11.69	11.34	11.25	11.6907	2.85484
Zr90	14.8	0.22	13.13	12.66	14.02	9.86	9.27	10.14	10.26	10.5	10.9	11.15	10.82	10.78	10.93	10.77	10.88	11.0713	2.5271
Nb93	0.553	0.014	0.454	0.538	0.453	0.501	0.514	0.522	0.491	0.512	0.553	0.551	0.551	0.552	0.549	0.498	0.538	0.518467	0.0678733
Mo95	0.068	0.021	0.096	<LOD	0.088	<LOD	0.098	<LOD	<LOD	0.124	<LOD	<LOD	0.041	0.053	0.071	<LOD	0.048	0.077375	0.0579649
Sn118	0.71	0.067	1.47	1.25	1.44	1.43	1.13	1.18	1.61	1.1	1.27	1.24	1.34	1.66	1.47	1.64	1.33	1.37067	0.359958
Sb121	0.462	0.032	0.87	0.79	0.8	1.05	1.06	1.03	1.04	1.36	1.26	0.81	0.87	1.17	1.43	1.42	1.28	1.08267	0.45541
Cs133	0.00646	0.00072	<LOD	<0.0136	0.041	0.0052	0.0078	<LOD	0.0067	0.0048	<LOD	0.0066	0.0042	0.0102	0.0123	<0.0070	0.0074	0.01062	0.0219115
Ba137	6.75	0.13	6.35	5.68	5.67	6.39	5.69	5.86	6.25	6.4	6.41	6.46	6.02	6.58	6.76	6.97	6.05	6.236	0.797525
La139	0.627	0.012	0.648	0.502	0.6	0.464	0.487	0.501	0.571	0.54	0.54	0.554	0.555	0.568	0.544	0.536	0.531	0.542733	0.090996
Ce140	1.92	0.023	1.911	1.845	1.79	1.81	1.84	1.862	1.8	1.969	1.93	1.952	1.934	1.87	1.976	1.895	1.874	1.88387	0.121165
Pr141	0.3723	0.0047	0.332	0.336	0.388	0.323	0.374	0.39	0.342	0.321	0.375	0.352	0.426	0.357	0.365	0.396	0.352	0.361933	0.0596105
Nd146	2.397	0.043	2.3	2.32	2.32	1.88	2.01	2.2	2.09	2	2.23	2.47	2	2.26	2.39	2.24	1.99	2.18	0.347481
Sm149	1.113	0.018	1.01	1.01	1.11	0.97	0.83	0.91	0.96	0.9	0.949	0.94	1.09	1.08	0.771	0.94	1.03	0.966667	0.187293
Eu151	0.5201	0.0047	0.473	0.505	0.494	0.471	0.436	0.51	0.511	0.497	0.445	0.533	0.566	0.57	0.554	0.506	0.463	0.502267	0.0820643
Gd157	1.809	0.021	1.32	1.35	1.68	1.27	1.01	1.28	1.22	1.24	1.48	1.58	1.52	1.25	1.47	1.16	1.51	1.356	0.358553
Tb159	0.3623	0.005	0.352	0.268	0.285	0.273	0.211	0.249	0.252	0.249	0.24	0.297	0.296	0.277	0.265	0.28	0.248	0.269467	0.0646037
Dy161	2.544	0.028	2.5	2.16	2.53	1.87	1.75	1.6	1.95	1.98	1.9	1.88	1.95	1.92	2.09	2.03	1.89	2	0.493732
Ho165	0.5718	0.0047	0.615	0.504	0.576	0.357	0.381	0.426	0.414	0.402	0.432	0.411	0.4	0.454	0.409	0.419	0.416	0.441067	0.141991
Er166	1.68	0.015	1.64	1.4	1.73	1.21	1.07	1.16	1.4	1.25	1.32	1.28	1.13	1.26	1.41	1.25	1.27	1.31867	0.35664
Tm169	0.2558	0.004	0.21	0.255	0.2	0.166	0.166	0.223	0.189	0.179	0.193	0.177	0.204	0.193	0.225	0.214	0.196	0.199333	0.0478131
Yb172	1.631	0.015	1.64	1.53	1.57	1.21	1.02	1.16	1.27	1.27	1.28	1.57	1.21	1.28	1.38	1.28	1.39	1.33733	0.348504
Lu175	0.2484	0.0032	0.206	0.257	0.215	0.165	0.151	0.156	0.193	0.178	0.169	0.159	0.18	0.17	0.189	0.139	0.161	0.1792	0.0595708
Hf178	0.5822	0.0088	0.468	0.47	0.434	0.366	0.343	0.405	0.404	0.364	0.404	0.322	0.397	0.295	0.436	0.482	0.284	0.3916	0.124181
Ta181	0.0414	0.002	0.0363	0.0305	0.0315	0.0334	0.0348	0.0343	0.0372	0.0192	0.0416	0.0385	0.0329	0.0402	0.0255	0.0461	0.0341	0.0344067	0.0129616
Pb208	3.037	0.049	2.76	2.75	2.68	2.88	2.92	3.1	3.21	3.07	3.18	2.94	2.97	2.92	3.12	3.28	3.22	3	0.372942
Th232	0.0328	0.0015	0.036	0.0218	0.0146	0.0132	0.0116	0.0244	0.0224	0.0177	0.027	0.0288	0.0251	0.0174	0.0232	0.0355	0.0265	0.0230133	0.0146517
U238	0.01051	0.00041	0.027	0.0216	0.0171	0.0179	0.0139	0.0118	0.034	0.0231	0.0121	0.0188	0.0098	0.0149	0.0253	0.0211	0.0139	0.01882	0.0132446
< LOD (Lower than limit of detection)
(BIR-1, preferred values: Jochum K. P., Weis, U., Schwager, B., Stoll, B., Wilson, S. A., Haug, G. H., Andreae, M. O., Enzweiler, J., 2015.
Reference values following ISO guidelines for frequently requested rock reference materials. Geostandards and Geoanalytical Research, 40: 333‑350.
Uncertanties of individual points (1-sigma errors)
Element			BIR-1a	BIR-1b	BIR-2G	BIR-1b	BIR-1c	Bir-1a	BIR-1b	BIR-1a	BIR-1b	BIR-1a	BIR-1b	BIR-1c	BIR-2a	BIR-1b	BIR-1d
Li7			0.46	0.63	0.3	0.36	0.46	0.48	0.54	0.37	0.47	0.5	0.59	0.57	0.5	0.58	0.47
P31			12.08	12.89	12.38	12.16	12.65	12.98	14.36	12.47	13.56	13.3	13.62	14.07	14.28	14.79	13.02
Ca42			3113.53	3246.8	3783.19	3626.89	4080.83	3404.92	4009.98	3160.67	3425.87	3447.36	3730.08	4115.39	3102.91	3302.66	3350.32
Sc45			1.67	1.77	2.55	1.43	1.63	1.6	2.1	1.87	2.31	1.68	2	2.3	1.52	1.65	1.8
Ti49			182.99	192.84	178.36	206.65	228.39	216.53	265.49	198.36	225.33	210.87	232.05	257.96	185.05	195.37	197.69
V51			10.43	11.1	12.77	12.36	14.38	14.49	18	11.44	13.32	12.02	13.37	14.96	11.61	13.05	13.19
Cr52			14.53	15.91	16.6	17.68	20.63	19.61	25.2	12.55	13.53	14.88	16.45	18.26	14.06	15.13	15.4
Mn55			46.4	49.95	46.25	68.86	83.76	51.96	62.62	41.9	45.2	58.23	67.27	77.88	49.9	54.7	57.15
Co59			1.87	2.07	1.77	4.31	5.42	2.28	2.78	1.78	1.99	2.4	2.78	3.15	2.14	2.41	2.55
Ni62			6.43	7.05	6.43	13.88	17.3	6.13	6.82	7.15	9.15	7.97	9.14	10.6	6.47	6.86	6.97
Cu65			4.95	5.37	5.41	9.6	11.78	5.68	6.8	6.14	8.1	5.89	6.82	7.9	6	6.44	6.87
Zn66			4.31	5.2	3.75	5.07	6.6	4.39	5.61	2.67	2.84	4.3	4.97	6.51	2.77	3.1	2.97
Ga71			0.59	0.65	0.76	1.18	1.48	0.82	1.04	0.67	0.82	0.79	0.92	1.04	0.66	0.73	0.74
Rb85			0.025	0.024	0.023	0.019	0.02	0.021	0.023	0.021	0.021	0.022	0.022	0.026	0.023	0.023	0.019
Sr88			4.26	4.96	3.97	4.64	5.35	4.8	5.95	4.44	5.39	4.84	5.61	6.4	3.54	3.67	3.73
Y89			0.69	0.78	0.94	0.5	0.6	0.49	0.63	0.71	0.94	0.57	0.66	0.82	0.51	0.57	0.59
Zr90			0.56	0.6	0.8	0.45	0.49	0.49	0.61	0.56	0.73	0.61	0.7	0.82	0.51	0.58	0.6
Nb93			0.038	0.047	0.034	0.036	0.04	0.042	0.045	0.036	0.039	0.041	0.043	0.044	0.04	0.042	0.039
Mo95			0.035	0.035	0.032	0.029	0.042	0.036	0.031	0.043	0.022	0.019	0.026	0.03	0.038	0.028	0.025
Sn118			0.23	0.25	0.28	0.23	0.23	0.16	0.2	0.18	0.22	0.25	0.31	0.45	0.23	0.28	0.21
Sb121			0.33	0.38	0.4	0.31	0.38	0.28	0.38	0.73	0.85	0.5	0.74	1.41	0.29	0.36	0.33
Cs133			0.0031	0.005	0.011	0.0023	0.0047	0.0038	0.0035	0.0022	0.0027	0.0031	0.0029	0.0048	0.0047	0.0042	0.0032
Ba137			0.39	0.4	0.32	0.35	0.35	0.41	0.52	0.34	0.36	0.36	0.37	0.43	0.37	0.41	0.35
La139			0.042	0.039	0.044	0.031	0.036	0.033	0.04	0.031	0.032	0.039	0.042	0.047	0.038	0.043	0.041
Ce140			0.085	0.089	0.083	0.1	0.12	0.092	0.1	0.095	0.11	0.093	0.099	0.11	0.09	0.096	0.092
Pr141			0.025	0.027	0.026	0.026	0.034	0.032	0.035	0.024	0.03	0.026	0.032	0.03	0.027	0.033	0.028
Nd146			0.2	0.22	0.18	0.14	0.16	0.21	0.24	0.17	0.21	0.19	0.17	0.2	0.21	0.23	0.21
Sm149			0.13	0.16	0.18	0.11	0.11	0.15	0.2	0.086	0.093	0.1	0.13	0.14	0.089	0.11	0.11
Eu151			0.047	0.057	0.047	0.04	0.042	0.052	0.063	0.051	0.056	0.056	0.067	0.078	0.048	0.05	0.044
Gd157			0.17	0.19	0.28	0.13	0.12	0.16	0.2	0.15	0.21	0.2	0.23	0.22	0.15	0.14	0.15
Tb159			0.044	0.042	0.036	0.033	0.032	0.023	0.027	0.026	0.03	0.029	0.033	0.035	0.024	0.027	0.023
Dy161			0.19	0.19	0.28	0.13	0.14	0.13	0.19	0.16	0.18	0.16	0.2	0.23	0.18	0.2	0.19
Ho165			0.065	0.067	0.066	0.029	0.036	0.038	0.046	0.05	0.07	0.04	0.046	0.06	0.031	0.035	0.033
Er166			0.23	0.25	0.15	0.13	0.15	0.17	0.28	0.16	0.22	0.12	0.12	0.15	0.13	0.15	0.15
Tm169			0.035	0.049	0.041	0.031	0.039	0.028	0.031	0.024	0.031	0.027	0.037	0.042	0.023	0.024	0.021
Yb172			0.22	0.26	0.15	0.13	0.13	0.17	0.25	0.11	0.12	0.17	0.15	0.18	0.13	0.14	0.14
Lu175			0.04	0.063	0.025	0.016	0.017	0.03	0.052	0.018	0.02	0.021	0.028	0.031	0.021	0.019	0.02
Hf178			0.097	0.11	0.085	0.058	0.063	0.066	0.072	0.052	0.058	0.054	0.06	0.049	0.068	0.075	0.05
Ta181			0.0096	0.0097	0.0088	0.0068	0.0077	0.0079	0.0084	0.0049	0.0078	0.0073	0.007	0.0075	0.0069	0.0098	0.0072
Pb208			0.22	0.28	0.33	0.3	0.38	0.35	0.51	0.26	0.36	0.27	0.33	0.4	0.27	0.35	0.36
Th232			0.0099	0.0081	0.0065	0.0059	0.0054	0.007	0.0081	0.0048	0.007	0.0064	0.0062	0.0049	0.0066	0.0088	0.0062
U238			0.0063	0.0058	0.0053	0.0043	0.0046	0.005	0.0093	0.005	0.0039	0.0046	0.0035	0.004	0.0065	0.0065	0.0044
GLITTER!: Minimum detection limits (99% confidence).
Element			BIR-1a	BIR-1b	BIR-2G	BIR-1b	BIR-1c	Bir-1a	BIR-1b	BIR-1a	BIR-1b	BIR-1a	BIR-1b	BIR-1c	BIR-2a	BIR-1b	BIR-1d
Li7			0.21	0.219	0.121	0.145	0.0947	0.0776	0.111	0.23	0.163	0.263	0.178	0.179	0.364	0.326	0.256
P31			5.1	5.56	5.22	5.39	4.69	5.31	5.67	8	7.51	8.24	8.15	6.53	10.41	12.13	7.4
Ca42			75.89	78.11	59.21	63.99	52.07	58.4	57.66	65.77	61.17	64.74	62.56	50.23	95.82	110.31	67.54
Sc45			0.146	0.174	0.153	0.125	0.106	0.137	0.136	0.123	0.104	0.116	0.0986	0.0933	0.163	0.195	0.1
Ti49			0.422	0.419	0.483	0.402	0.464	0.342	0.431	0.683	1	0.36	0.447	0.341	0.643	1.15	0.504
V51			0.0485	0.0513	0.0379	0.0515	0.0451	0.0382	0.0362	0.0467	0.0602	0.0527	0.0458	0.0446	0.0764	0.0943	0.059
Cr52			0.994	1.07	1.07	1.1	0.959	1.1	1.14	0.826	0.806	0.879	0.822	0.695	1.1	1.26	0.787
Mn55			0.197	0.258	0.234	0.221	0.19	0.245	0.249	0.142	0.166	0.144	0.15	0.131	0.188	0.226	0.124
Co59			0.0158	0.00984	<0.00000	0.0154	0.0118	0.0163	<0.00000	0.0122	0.0309	<0.00000	0.0179	0.0213	0.031	0.0236	0.0178
Ni62			0.09	0.0685	<0.00000	0.0777	0.0735	0.0678	0.129	0.0596	0.141	0.126	0.0853	0.0883	0.0955	0.162	0.112
Cu65			0.0543	0.058	0.0773	0.068	0.0524	0.0852	0.0937	0.113	0.0989	0.0753	0.0512	0.0616	0.0843	0.159	0.0438
Zn66			0.216	0.199	0.223	0.209	0.197	0.212	0.223	0.307	0.225	0.243	0.21	0.214	0.346	0.436	0.252
Ga71			0.0309	0.0234	0.0294	0.0503	0.0215	0.0309	0.0367	0.0345	0.033	0.0332	0.0226	0.0271	0.0176	0.0302	0.0296
Rb85			0.0176	0.022	0.0132	0.0145	0.0147	0.014	0.0206	0.0162	0.0198	0.0212	0.0211	0.0135	0.0242	0.0258	0.0139
Sr88			0.0113	0.0105	0.00934	0.00631	0.00483	0.011	0.0118	0.00767	0.0256	0.00467	0.00895	0.0152	0.00732	0.0151	<0.00000
Y89			0.0205	0.0138	0.0111	0.00723	0.00554	0.0063	0.0098	0.00474	0.0064	<0.00000	<0.00000	<0.00000	0.00565	<0.00000	<0.00000
Zr90			0.0246	0.0367	0.0257	0.0203	0.011	0.0173	0.0137	<0.00000	0.0204	0.00996	0.00966	0.0117	0.0113	<0.00000	0.00829
Nb93			0.00747	0.0113	0.00705	0.0121	<0.00000	0.00729	0.0112	0.00632	0.00597	0.00658	0.00898	<0.00000	<0.00000	0.0174	0.00537
Mo95			<0.00000	0.0715	<0.00000	0.0677	0.0646	0.1	0.0458	0.058	0.0454	0.0355	0.0342	0.0411	0.0558	0.0796	0.0281
Sn118			0.366	0.406	0.337	0.287	0.25	0.299	0.302	0.284	0.262	0.289	0.272	0.22	0.404	0.46	0.293
Sb121			0.0526	0.0435	0.0592	0.057	0.04	0.0603	0.0549	<0.00000	0.0836	0.0544	<0.00000	0.0338	0.119	0.118	0.0724
Cs133			0.00652	0.0136	0.00526	<0.00000	0.00763	0.0086	<0.00000	<0.00000	0.00581	<0.00000	0.00355	<0.00000	0.00575	0.00702	0.00309
Ba137			0.0486	0.037	0.0575	0.0412	0.0448	0.0499	<0.00000	0.0412	0.0534	0.0304	<0.00000	<0.00000	<0.00000	<0.00000	0.0363
La139			0.00547	0.00585	<0.00000	<0.00000	0.00597	0.00479	0.00532	0.0055	0.00362	<0.00000	0.00545	<0.00000	<0.00000	0.00552	0.00339
Ce140			0.00812	<0.00000	<0.00000	<0.00000	0.00429	0.00945	0.00518	<0.00000	<0.00000	0.00409	0.00552	<0.00000	<0.00000	0.00984	0.00494
Pr141			0.00407	0.00436	<0.00000	0.00469	0.00359	<0.00000	<0.00000	0.00325	0.00308	0.00593	<0.00000	<0.00000	<0.00000	0.00469	0.00408
Nd146			<0.00000	0.0575	<0.00000	<0.00000	<0.00000	0.0343	0.0383	0.0387	0.0367	0.0289	0.039	<0.00000	<0.00000	<0.00000	<0.00000
Sm149			0.0346	0.0378	0.0317	0.0502	<0.00000	<0.00000	<0.00000	<0.00000	0.0213	0.0236	0.0233	0.0203	<0.00000	0.0333	0.0205
Eu151			0.00932	0.0139	0.0131	0.0153	0.00814	0.0159	0.0175	0.01	0.00668	<0.00000	<0.00000	0.00597	0.00872	<0.00000	<0.00000
Gd157			0.0476	0.0737	0.0457	0.0459	0.0489	<0.00000	<0.00000	0.0294	0.028	<0.00000	<0.00000	0.0425	<0.00000	<0.00000	0.0273
Tb159			0.0135	0.00731	0.00638	0.00617	0.00807	0.00513	0.00584	0.0037	0.00356	0.00394	<0.00000	<0.00000	0.00471	0.00552	0.00339
Dy161			0.0277	0.0516	<0.00000	0.0241	0.018	<0.00000	0.0235	<0.00000	0.0136	<0.00000	0.0144	0.0124	0.0179	<0.00000	0.0131
Ho165			<0.00000	<0.00000	<0.00000	<0.00000	0.0084	<0.00000	<0.00000	0.0064	<0.00000	<0.00000	<0.00000	0.00315	0.0046	0.00545	<0.00000
Er166			0.038	0.0232	0.0199	0.0262	<0.00000	0.0226	0.0257	0.011	<0.00000	0.0164	<0.00000	<0.00000	<0.00000	<0.00000	0.0104
Tm169			0.0142	0.013	0.0124	0.00908	0.0069	<0.00000	0.00867	<0.00000	<0.00000	<0.00000	<0.00000	0.00444	0.00652	<0.00000	<0.00000
Yb172			<0.00000	0.0722	<0.00000	<0.00000	<0.00000	0.0303	0.0335	<0.00000	<0.00000	<0.00000	<0.00000	<0.00000	0.0266	<0.00000	0.0198
Lu175			<0.00000	0.00749	0.00631	0.00615	0.00641	<0.00000	0.00859	0.00359	0.00341	0.00525	0.00365	0.00316	0.00455	0.00746	<0.00000
Hf178			0.0464	0.0491	0.0612	<0.00000	<0.00000	<0.00000	0.0386	<0.00000	<0.00000	0.0356	0.0245	0.021	0.0425	<0.00000	0.0311
Ta181			0.00902	0.00988	0.00841	<0.00000	0.00474	0.00542	<0.00000	<0.00000	0.00389	<0.00000	0.00422	0.00366	0.00526	<0.00000	<0.00000
Pb208			0.0089	0.00962	0.0111	0.0176	0.0114	0.0149	0.0118	0.0128	0.00876	0.0131	0.0177	0.0158	0.025	0.0277	0.019
Th232			0.00949	0.00722	0.0088	0.011	0.00851	0.00565	0.0107	<0.00000	0.00668	<0.00000	0.00399	0.00336	0.00511	0.00606	<0.00000
U238			0.00408	<0.00000	0.00413	<0.00000	0.00566	0.00652	0.00523	<0.00000	0.00332	<0.00000	0.00327	0.00272	<0.00000	<0.00000	<0.00000

## Sheet: SD3. ol-PN composition
Composition of clinopyroxes from PN massif
All values are reported in ppm
Trace Element Concentrations (MDL filtered).
run	1	1	1	1	1	1	1	1		2	2	2	2	2		3	3	3	3	3		4	4	4	4	4		5	5	5	5	5		6	6	6	6	6		7	7	7
sample	117	117	117	117	117	117	117	117		163	163	163	163	163		41	41	41	41	41		58	58	58	58	58		165	165	165	165	165		30	30	30	30	30		180	180	180
Element	olv3	olv4	olv4b2	olv5	olv8	olv9	olv14b	olv15c		olv14	olv15a	olv16	olv19	olv19-3		Olv4	Olv8a	Olv10	Olv11	Olv12		olv-14	olv-15	olv-16	olv-17	olv-19		Olv-2-1	olv-3-1-8	Olv3-2-9	Olv1-1-10	Olv1-2-11		Olv-1-1-7	Olv-4-2-10	Olv-2-1-16b	Olv-3-1-5	Olv-3-2-6		Olv1-1	Olv2-2	Olv2-3
mg#	0.737	0.758	0.752	0.76	0.75	0.751	0.748	0.746		0.808	0.807	0.835	0.839	0.853		0.654	0.734	0.679	0.679	0.695		0.754	0.753	0.749	0.756	0.757		0.67	0.766	0.778	0.819	0.824		0.801	0.84	0.862	0.858	0.847		0.689	0.661	0.663
Li7	1.64	0.3	0.45	0.36	0.174	0.8	2.09	1.17		3.02	2.99	2.61	3.98	4.85		2.37	1.68	3.22	1.63	2.4		7.95	5.12	5.64	4.45	6.02		9.98	8.14	5.72	4.9	10.75		5.7	10.83	8.9	11.92	4.88		8.28	4.7	3.71
P31	38.23	50.11	62.5	54.98	26.32	48.22	69.49	46.12		59.9	63.47	51.12	54.03	65.12		54.84	25.72	66.79	21.12	54.04		158.03	53	82.32	53.42	74.32		88.63	74.08	58.86	50.91	131.63		59.41	138.71	99.03	143.78	75.97		128.83	109.69	82.35
Ca42	1468.48	1110.98	1185.35	1231.77	1509.39	1313.86	1320.5	1329.8		2360.45	2233.43	2079.73	2573.25	2425.02		2340.28	2261.61	2172.04	2433.56	2555.78		1040.98	1291.92	1069.05	1050.86	1156.45		2364.34	2066.51	2005.25	2615.15	2411.12		2625.62	2603.11	2312.65	2092.81	1809.42		2451.84	2688.76	2539.96
Sc45	3.99	3.91	4.22	4.16	4.98	4.25	4.17	4.55		6.44	6.49	6.52	7	6.14		2.86	3.98	3.15	2.98	3.31		2.87	3.55	2.84	3.21	3.47		5.36	4.8	4.9	5.99	5.85		6.36	5.16	4.66	4.41	3.98		4.34	4.31	4.07
Ti49	57.55	134.8	135.75	106.96	169.84	135.52	103.37	120.52		114.86	124.27	126.33	114.17	100.37		91.87	104.5	142.84	134.28	189.9		91.24	129.24	121.59	78.92	83.09		147.75	143.47	143.52	182.72	171.89		165.98	143.55	129.38	133.72	108.38		151.03	177.3	175.8
V51	1.713	3.08	3.34	2.99	3.29	2.12	2.87	2.96		6.19	6.35	6.39	6.41	4.95		7.31	5.95	6.75	6.45	7.23		1.8	4.17	3.06	2.73	2.67		5.38	7.74	6.71	7.66	7.9		7.11	6.32	7.04	7	5.86		6.5	7.43	6.62
Cr52	26.51	11.63	10.89	9.79	11.54	7.36	12.84	27.2		136.57	147.48	166.24	170.45	123.3		37.09	117.16	21.07	15.46	9.43		7.46	7.84	6.98	27.29	8.3		55.69	54.84	61.38	105.86	102.4		27.36	204.07	381.84	381.29	339.44		75.66	4.22	7.23
Mn55	3337.47	3467.21	3445.53	3377.25	3332.94	3261.63	3287.11	3316.2		2031.16	2146.76	1811.23	1639.74	1659.8		3898.76	2676.63	3885.75	3523.74	4362.42		2842.64	2907.9	2896.18	2888.79	2843.63		5047.37	2302.09	2483.95	1461.35	1680.35		1797.11	1569.49	1429.13	1412.42	1321.17		4173.63	4868.37	4847.23
Co59	201.04	230.64	224.48	224	212.02	209.49	213.46	215.72		186.74	193.13	177.32	169.75	173.03		192.32	176.93	186.16	186.39	200.31		169.21	168.39	164.24	170.87	176.55		146.29	199.95	211.36	183.23	176.06		248.66	197.88	180.86	176.55	166.32		194.1	178	182.23
Ni62	1063.04	1244.29	1210.39	1201.89	1111.16	1123.25	1115.51	1125.6		1481.07	1539.3	1689.04	1587.83	1627.45		906.03	1351.12	962.61	941.28	956.77		910.95	913.67	894.13	954.47	1037.13		972.28	1385.23	1507.91	1709.85	1668.54		1377.68	1646.46	2003.76	1995.04	1874.87		757.5	390.45	406.77
Cu65	0.473	0.485	0.556	0.427	0.417	0.319	0.537	0.455		0.487	0.672	0.405	0.537	0.67		0.39	0.469	0.78	0.338	0.434		0.437	0.579	0.514	0.463	0.527		0.28	0.56	0.53	0.488	0.346		0.38	0.61	0.485	0.416	0.384		0.406	0.528	0.312
Zn66	212.91	192.28	189.47	194.11	188.15	200.54	199.19	204.21		136.34	152	168.4	138.9	121.28		301.49	253.62	273.48	271.88	334.07		217.27	227.47	225.35	221.51	218.72		347.15	238.05	260.48	102.5	149.78		126.05	113.12	104.26	105.87	99.08		263.71	274.35	278.05
Ga71	0.171	0.151	0.248	0.124	0.189	0.108	0.153	0.165		0.248	0.213	0.366	0.357	0.277		0.466	0.311	0.28	0.308	0.437		0.135	0.291	0.209	0.2	0.229		0.411	0.388	0.417	0.242	0.42		0.293	0.24	0.259	0.236	0.293		0.386	0.437	0.349
Rb85	0.0226	<LLOD	0.058	<LLOD	<LLOD	<LLOD	<LLOD	0.222		0.071	0.0174	<LLOD	<LLOD	<LLOD		<LLOD	<LLOD	<LLOD	0.0155	0.065		<LLOD	0.0107	0.0133	0.067	<LLOD		<LLOD	<LLOD	<LLOD	<LLOD	<LLOD		0.019	<LLOD	<LLOD	<LLOD	<LLOD		<LLOD	0.103	<LLOD
Sr88	<LLOD	<LLOD	<LLOD	0.0095	<LLOD	<LLOD	0.0152	0.0216		0.0184	0.0188	0.0101	0.0522	0.0135		0.0093	0.0113	0.091	<LLOD	0.0532		0.299	0.0139	<LLOD	0.0092	<LLOD		0.0396	0.0264	0.0218	0.26	<LLOD		0.0139	0.076	0.0352	0.0315	0.0466		0.0364	0.0364	0.0206
Y89	0.382	0.291	0.282	0.371	0.501	0.323	0.402	0.376		0.227	0.214	0.238	0.248	0.277		1.01	0.464	1.156	0.859	1.73		0.385	0.567	0.593	0.367	0.418		0.184	0.13	0.16	0.125	0.122		0.143	0.1	0.104	0.116	0.088		0.739	1.587	1.54
Zr90	<LLOD	0.11	0.149	0.174	0.243	0.099	0.074	0.142		0.074	0.063	0.09	0.052	0.092		0.138	0.08	0.287	0.172	0.251		0.076	0.243	0.227	0.126	0.037		0.053	0.079	0.069	0.082	0.046		0.079	0.084	0.071	0.082	0.051		0.19	0.183	0.224
Nb93	<LLOD	0.0089	0.0106	<LLOD	<LLOD	0.0129	<LLOD	<LLOD		0.008	<LLOD	<LLOD	<LLOD	<LLOD		0.0023	0.0075	0.0218	0.0092	0.0165		0.0106	<LLOD	0.0333	0.0143	<LLOD		<LLOD	<LLOD	<LLOD	0.0126	<LLOD		<LLOD	<LLOD	<LLOD	0.0049	<LLOD		<LLOD	<LLOD	<LLOD
Mo95	0.063	<LLOD	<LLOD	0.117	<0.062	0.066	<LLOD	0.161		0.065	0.01	<LLOD	<LLOD	<LLOD		<LLOD	0.063	0.11	<0.050	0.092		<LLOD	0.068	0.054	<LLOD	0.045		0.173	<LLOD	0.038	<LLOD	<LLOD		<LLOD	<LLOD	<LLOD	<0.032	<0.043		<LLOD	0.049	0.046
Sn118	0.65	0.66	0.75	0.45	0.79	0.59	0.78	0.56		0.66	0.56	0.69	0.43	0.59		0.74	0.68	<LLOD	0.55	0.29		<0.28	0.4	0.25	<LLOD	0.31		0.54	0.58	0.4	0.39	0.4		0.72	0.51	0.42	0.43	0.31		0.62	0.41	0.68
Sb121	0.051	<LLOD	<LLOD	<LLOD	<LLOD	<LLOD	<LLOD	<LLOD		<LLOD	<LLOD	0.057	<LLOD	<LLOD		<LLOD	<LLOD	<LLOD	<LLOD	0.062		0.028	<LLOD	<LLOD	<LLOD	0.041		<LLOD	0.129	<LLOD	<LLOD	<LLOD		0.087	<0.052	0.16	0.034	0.032		<LLOD	0.259	<LLOD
Cs133	<LLOD	<LLOD	0.0205	0.0417	0.0137	0.155	0.0082	0.0377		0.0096	<LLOD	<LLOD	<LLOD	<LLOD		<LLOD	<LLOD	<LLOD	<LLOD	<LLOD		<LLOD	0.0055	<LLOD	0.0087	<LLOD		<LLOD	<LLOD	<LLOD	0.0446	<LLOD		0.0035	<LLOD	0.232	<LLOD	<LLOD		<LLOD	0.0034	<LLOD
Ba137	0.0082	<LLOD	<LLOD	<LLOD	<LLOD	0.049	<LLOD	0.073		<LLOD	<LLOD	<LLOD	<LLOD	0.042		0.011	0.037	0.074	<LLOD	<LLOD		0.021	<LLOD	0.057	<LLOD	0.039		<LLOD	<LLOD	<LLOD	0.174	<LLOD		<LLOD	0.051	<0.00	<LLOD	<LLOD		0.0063	0.0124	<LLOD
La139	<LLOD	<LLOD	<LLOD	<LLOD	<LLOD	<LLOD	<LLOD	0.0048		<LLOD	0.0039	<LLOD	0.0071	<LLOD		<LLOD	<LLOD	0.0128	<LLOD	<LLOD		0.237	<LLOD	0.0064	<LLOD	<LLOD		<LLOD	<LLOD	<LLOD	0.593	<LLOD		0.0019	<LLOD	0.0042	0.003	0.00092		<0.0029	0.004	0.0016
Ce140	0.0088	<LLOD	0.0053	<LLOD	<LLOD	0.004	<LLOD	0.0069		0.0051	<LLOD	<LLOD	0.0104	<LLOD		0.003	<LLOD	0.0357	<LLOD	0.0156		0.49	0.031	<LLOD	<LLOD	0.0026		0.0119	0.004	0.0027	0.0263	<LLOD		0.0057	0.0067	0.0064	0.0039	0.0019		0.0034	0.0243	0.013
Pr141	0.0039	<LLOD	<LLOD	<LLOD	<LLOD	<LLOD	<LLOD	<LLOD		<LLOD	0.0021	<LLOD	0.0046	<LLOD		0.0041	<LLOD	<LLOD	<LLOD	<LLOD		0.064	0.0034	<LLOD	<LLOD	<LLOD		<0.0054	<LLOD	0.0011	0.0036	<LLOD		<LLOD	<LLOD	<LLOD	<LLOD	0.00077		0.0042	0.0041	0.00134
Nd146	0.018	<LLOD	0.011	<LLOD	<LLOD	<LLOD	<LLOD	<LLOD		<LLOD	<LLOD	<LLOD	0.021	0.022		<0.043	<LLOD	0.021	0.018	<LLOD		0.16	0.019	0.018	<LLOD	0.0095		0.065	<0.051	<0.033	0.018	<LLOD		<LLOD	<LLOD	<LLOD	<LLOD	<LLOD		0.036	0.018	0.022
Sm149	<LLOD	<LLOD	<LLOD	0.029	<LLOD	<LLOD	<LLOD	<LLOD		<LLOD	0.025	<LLOD	<LLOD	<LLOD		0.0098	<LLOD	0.027	<LLOD	<LLOD		0.043	0.025	<LLOD	<LLOD	0.0082		<LLOD	0.0057	<LLOD	<LLOD	<LLOD		<LLOD	0.0123	0.0065	0.018	<LLOD		<LLOD	0.0199	0.028
Eu151	<LLOD	<LLOD	<LLOD	<LLOD	0.0072	<LLOD	<LLOD	<LLOD		<LLOD	<LLOD	0.0112	<0.0129	<LLOD		0.0122	0.0073	0.0143	0.0047	0.0212		<LLOD	0.0105	0.0025	<LLOD	<LLOD		<LLOD	<LLOD	0.0025	0.0048	<LLOD		0.0034	<LLOD	0.0038	0.009	<LLOD		<LLOD	0.0154	0.0059
Gd157	<LLOD	0.043	0.013	<LLOD	<LLOD	<LLOD	0.101	<LLOD		0.025	0.073	0.043	0.027	<LLOD		<LLOD	<LLOD	0.036	0.07	0.049		<LLOD	<LLOD	<LLOD	<LLOD	<LLOD		<LLOD	0.029	0.01	<LLOD	<LLOD		<LLOD	<LLOD	0.016	0.0074	<LLOD		0.026	0.069	0.067
Tb159	<LLOD	<LLOD	0.0038	0.0077	0.0052	0.0078	<LLOD	<LLOD		<LLOD	0.0104	<LLOD	<LLOD	<LLOD		0.0121	0.0139	0.008	0.0133	0.0106		<LLOD	0.0071	0.011	<LLOD	<LLOD		<LLOD	<LLOD	0.0013	0.0033	0.0038		<LLOD	0.002	<LLOD	0.0029	<LLOD		0.0076	0.0233	0.0249
Dy161	0.04	<LLOD	0.039	<LLOD	<LLOD	<LLOD	0.046	0.025		<LLOD	<LLOD	<LLOD	0.037	<LLOD		0.144	0.087	0.194	0.094	0.146		0.077	0.039	0.038	0.045	<LLOD		0.0275	0.0143	0.027	0.016	0.0029		0.031	<LLOD	0.032	<LLOD	0.0104		0.126	0.196	0.229
Ho165	0.0193	<LLOD	0.0083	<LLOD	0.0191	0.0149	0.0133	0.0176		<LLOD	0.0169	0.006	<LLOD	0.006		0.0381	0.0111	0.0384	0.0281	0.065		0.0145	0.0185	0.0144	0.0181	<LLOD		<LLOD	0.0045	0.0041	0.0033	0.0038		0.0072	<LLOD	<LLOD	0.0028	0.0078		0.0302	0.0434	0.0544
Er166	0.068	0.048	0.057	0.031	0.04	<LLOD	<LLOD	0.091		<LLOD	0.053	0.026	0.04	0.049		0.189	0.092	0.125	0.096	0.262		0.089	0.04	0.093	0.052	0.075		0.016	0.0189	0.043	0.0173	0.0177		0.0054	0.0174	0.0273	<LLOD	0.034		0.1	0.192	0.229
Tm169	<LLOD	0.0149	0.0121	0.0081	0.013	0.0102	0.0217	0.0145		0.0053	<LLOD	0.0096	<LLOD	<LLOD		0.04	0.0072	0.038	0.029	0.049		0.0112	0.0191	0.0284	0.0233	0.0122		0.0062	0.0066	0.0026	0.0042	0.0029		<LLOD	0.0038	<LLOD	0.0056	0.0035		0.0115	0.0364	0.0447
Yb172	0.08	<LLOD	<LLOD	0.086	0.139	0.11	0.11	0.115		<LLOD	<LLOD	0.033	<LLOD	<LLOD		0.183	0.093	0.241	0.201	0.368		0.117	0.206	0.144	0.144	0.184		0.029	0.021	0.039	0.0145	0.026		0.095	0.0111	0.035	<0.028	0.024		0.167	0.402	0.368
Lu175	0.0407	0.0346	0.0196	0.0268	0.037	0.0179	0.032	0.0124		0.0066	<LLOD	0.0167	0.0124	0.0095		0.0284	0.014	0.0419	0.0361	0.084		0.0316	0.043	0.052	0.0228	0.0285		0.0045	0.0044	0.0099	0.0056	0.0051		0.0132	0.0096	0.0069	0.0067	0.0034		0.0191	0.0594	0.0675
Hf178	<LLOD	<LLOD	<LLOD	<LLOD	0.048	<LLOD	<LLOD	<LLOD		<LLOD	<LLOD	<0.078	<LLOD	<LLOD		<LLOD	<LLOD	0.02	0.0083	0.034		<LLOD	0.048	<LLOD	0.019	<LLOD		0.005	<LLOD	<LLOD	0.0053	<LLOD		<LLOD	0.026	0.0135	<LLOD	<LLOD		<LLOD	<LLOD	0.02
Ta181	<LLOD	<LLOD	0.0018	<LLOD	0.0016	<LLOD	<LLOD	<LLOD		0.0033	<LLOD	<0.0049	<LLOD	<LLOD		0.0018	0.0014	0.005	<LLOD	<LLOD		0.0081	<LLOD	0.0015	<LLOD	<LLOD		<LLOD	<LLOD	<LLOD	<LLOD	<LLOD		<LLOD	0.0011	<LLOD	<LLOD	<LLOD		0.00093	<LLOD	0.00088
Pb208	<LLOD	0.087	0.083	0.074	0.0376	0.063	0.107	0.129		0.0136	0.027	0.065	0.045	0.046		0.047	<LLOD	<LLOD	<LLOD	<LLOD		<LLOD	<LLOD	<LLOD	<LLOD	0.0062		0.029	0.075	0.025	<LLOD	<LLOD		<LLOD	0.0183	0.0147	0.0187	0.0131		0.0295	<LLOD	0.104
Th232	0.0032	<LLOD	0.0057	<LLOD	0.0017	0.0058	<LLOD	<LLOD		<LLOD	<LLOD	<LLOD	<LLOD	0.0078		0.0017	<LLOD	<LLOD	0.0054	0.0095		0.061	<0.00	0.0031	0.0047	<LLOD		<LLOD	<LLOD	0.0028	<LLOD	<LLOD		0.0019	<LLOD	<LLOD	<LLOD	<LLOD		0.0588	0.00089	<LLOD
U238	<LLOD	0.0025	0.0023	0.0057	<LLOD	0.232	0.0262	<LLOD		0.042	<LLOD	0.0076	0.0012	<LLOD		0.075	0.0048	<LLOD	0.0595	0.0114		0.0081	<LLOD	<LLOD	<LLOD	<LLOD		<LLOD	0.00087	<LLOD	0.0728	0.108		0.0032	0.0703	0.00088	<LLOD	<LLOD		<LLOD	<LLOD	<LLOD
L LOD (Lower limit of detection)
Uncertanties of individual points (1-sigma errors)
Element	olv3	olv4	olv4b2	olv5	olv8	olv9	olv14b	olv15c		olv14	olv15a	olv16	olv19	olv19-3		Olv4	Olv8a	Olv10	Olv11	Olv12		olv-14	olv-15	olv-16	olv-17	olv-19		Olv-2-1	olv-3-1-8	Olv3-2-9	Olv1-1-10	Olv1-2-11		Olv-1-1-7	Olv-4-2-10	Olv-2-1-16b	Olv-3-1-5	Olv-3-2-6		Olv1-1	Olv2-2	Olv2-3
Li7	0.24	0.13	0.13	0.12	0.089	0.17	0.36	0.24		0.31	0.3	0.28	0.39	0.46		0.32	0.24	0.42	0.24	0.32		1.05	0.7	0.77	0.63	0.84		0.81	0.74	0.61	0.51	1.02		1.11	2	1.73	2.35	1.01		0.76	0.49	0.41
P31	5.1	6.5	7.92	7.04	3.76	6.3	8.73	6		8.17	8.61	7.08	7.5	8.89		7.41	3.9	8.93	3.38	7.31		21.64	7.63	11.51	7.72	10.54		10.45	9.17	7.82	6.65	15.33		8.76	17.63	13.07	18.46	10.2		15.05	12.95	9.9
Ca42	61.04	52.35	53.59	55.31	63.07	59.75	58.53	59.99		94.51	90.98	86.8	105.57	101.66		101.59	98.1	96.8	106.06	112.14		50.88	58.91	50.66	50.92	54.33		87.9	81.51	83.7	99.76	92.41		124.29	117.57	108.58	99.35	87.86		88.99	96.38	91.77
Sc45	0.19	0.2	0.21	0.21	0.24	0.22	0.22	0.24		0.33	0.34	0.35	0.38	0.34		0.16	0.19	0.17	0.16	0.17		0.16	0.19	0.16	0.18	0.19		0.26	0.26	0.29	0.33	0.33		0.4	0.32	0.3	0.29	0.26		0.19	0.19	0.18
Ti49	2.38	5.07	5.09	4.13	6.2	5.17	4.13	4.78		4.2	4.48	4.62	4.22	3.81		3.95	4.34	5.88	5.51	7.69		4.01	5.49	5.21	3.58	3.77		5.57	5.64	5.99	7.15	6.77		7.9	6.54	6.1	6.31	5.23		5.41	6.25	6.21
V51	0.083	0.14	0.14	0.13	0.14	0.1	0.13	0.14		0.25	0.26	0.27	0.27	0.22		0.31	0.25	0.29	0.28	0.31		0.1	0.21	0.16	0.15	0.15		0.22	0.32	0.3	0.32	0.33		0.37	0.31	0.35	0.35	0.3		0.26	0.29	0.26
Cr52	1.05	0.59	0.57	0.54	0.58	0.51	0.64	1.21		5.17	5.67	6.45	6.69	4.93		1.64	5.01	1.04	0.81	0.6		0.61	0.62	0.57	1.44	0.62		1.84	1.85	2.1	3.51	3.4		1.32	8.81	16.83	17.01	15.33		2.59	0.35	0.4
Mn55	111.87	116.57	117.19	115.43	114.51	114.94	117.59	122.75		66.88	71.21	60.38	54.96	55.98		181.59	128.12	189.16	174.79	220.86		107.44	110.73	111.28	112.17	111.73		158.69	73.32	79.98	47.25	54.57		93.39	82.87	77.99	78.36	74.53		144.36	169.45	170.07
Co59	6.99	8.05	7.94	7.97	7.58	7.71	7.99	8.39		6.17	6.42	5.92	5.69	5.83		13.74	13.11	14.11	14.48	15.98		7.03	7.06	6.96	7.34	7.69		4.86	6.8	7.35	6.41	6.21		13.27	10.72	10.13	10.05	9.62		7.18	6.65	6.88
Ni62	38.63	45.4	44.83	44.79	41.69	43.55	44.08	46.4		52.04	54.58	60.26	57.04	58.92		63.31	97.93	71.41	71.58	74.74		32.2	32.4	31.83	34.14	37.28		38.31	57.97	66.24	76.34	75.89		76.64	92.98	117.08	118.59	113.39		25.72	13.4	14.03
Cu65	0.075	0.081	0.083	0.072	0.07	0.072	0.084	0.079		0.084	0.096	0.073	0.089	0.097		0.081	0.08	0.12	0.07	0.079		0.086	0.094	0.085	0.079	0.089		0.068	0.099	0.11	0.088	0.074		0.11	0.1	0.093	0.086	0.084		0.074	0.088	0.073
Zn66	11.36	10.41	10.73	11.19	11.05	12.83	13.36	15.09		6.36	7.26	8.18	6.89	6.16		18.69	16.35	18.05	18.39	23.21		11.96	12.68	12.75	12.77	12.87		11.49	8.12	9.08	3.67	5.29		9.51	8.64	8.31	8.61	8.22		8.89	9.28	9.44
Ga71	0.024	0.025	0.032	0.024	0.028	0.024	0.027	0.027		0.032	0.031	0.042	0.041	0.037		0.054	0.04	0.039	0.04	0.051		0.027	0.041	0.031	0.032	0.034		0.042	0.043	0.052	0.033	0.042		0.053	0.036	0.039	0.036	0.039		0.038	0.041	0.036
Rb85	0.0084	0.0078	0.012	0.0062	0.0052	0.008	0.0064	0.025		0.013	0.0082	0.0071	0.0071	0.0064		0.0035	0.0055	0.0052	0.0055	0.012		0.006	0.0058	0.0066	0.012	0.006		0.0058	0.0076	0.0074	0.007	0.0061		0.011	0.0081	0.0086	0.007	0.0082		0.0072	0.013	0.0071
Sr88	0.0024	0.0036	0.0029	0.0044	0.0054	0.0054	0.0051	0.0061		0.0067	0.006	0.0045	0.0093	0.0053		0.0051	0.0049	0.013	0.0035	0.0091		0.026	0.0062	0.003	0.0038	0.0047		0.0079	0.006	0.0061	0.022	0.0078		0.006	0.011	0.0071	0.0072	0.0081		0.0059	0.0063	0.0049
Y89	0.033	0.031	0.03	0.035	0.041	0.033	0.039	0.038		0.026	0.024	0.027	0.027	0.03		0.063	0.034	0.07	0.054	0.097		0.031	0.039	0.04	0.03	0.032		0.017	0.015	0.019	0.014	0.014		0.021	0.013	0.014	0.014	0.012		0.039	0.072	0.07
Zr90	0.016	0.025	0.029	0.03	0.035	0.026	0.021	0.028		0.019	0.016	0.021	0.016	0.022		0.024	0.017	0.035	0.025	0.03		0.017	0.031	0.029	0.021	0.012		0.011	0.014	0.016	0.014	0.014		0.021	0.016	0.015	0.016	0.013		0.021	0.02	0.023
Nb93	0.0046	0.0045	0.0047	0.0028	0.0043	0.0061	0.0017	0.0037		0.0048	0.0043	0.0039	0.0037	0.0054		0.0023	0.0038	0.007	0.0041	0.0062		0.0059	0.0052	0.0088	0.0054	0.0042		0.0042	0.0034	0.0035	0.0052	0.0042		0.0052	0.0036	0.0042	0.0028	0.0023		0.002	0.0023	0.0029
Mo95	0.028	0.022	0.022	0.036	0.034	0.035	0.024	0.049		0.03	0.01	0.028	0.023	0.028		0.035	0.026	0.044	0.028	0.035		0.025	0.038	0.031	0.026	0.029		0.036	0.019	0.025	0.019	0.02		0.038	0.023	0.025	0.016	0.014		0.02	0.019	0.023
Sn118	0.14	0.15	0.16	0.15	0.16	0.16	0.16	0.16		0.14	0.13	0.15	0.14	0.15		0.15	0.14	0.13	0.13	0.12		0.12	0.12	0.11	0.12	0.11		0.11	0.13	0.13	0.11	0.1		0.22	0.17	0.16	0.16	0.14		0.12	0.12	0.12
Sb121	0.029	0.022	0.021	0.017	0.019	0.02	0.019	0.013		0.019	0.024	0.032	0.017	0.028		0.039	0.026	0.032	0.027	0.032		0.017	0.018	0.027	0.025	0.027		0.021	0.077	0.043	0.025	0.022		0.09	0.022	0.17	0.042	0.041		0.025	0.061	0.033
Cs133	0.0023	0.0019	0.0054	0.0073	0.0046	0.017	0.0034	0.008		0.0036	0.0012	0.0016	0.0018	0.0019		0.0024	0.0022	0.0026	0.0014	0.002		0.002	0.0036	0.0034	0.0036	0.0022		0.0017	0.0016	<0.00	0.0074	0.0015		0.0027	<0.00	0.08	0.002	0.0013		0.0013	0.0016	0.0017
Ba137	0.0082	0.0092	0.021	0.012	0.021	0.03	0.019	0.033		0.018	0.022	0.015	0.026	0.021		0.011	0.018	0.032	0.018	0.02		0.015	0.018	0.024	0.025	0.02		0.015	0.016	0.022	0.037	0.015		0.0089	0.026	<0.00	0.0085	0.013		0.0063	0.0088	0.012
La139	0.0036	0.0021	0.0028	0.0014	0.0024	0.0039	0.0031	0.0028		0.0019	0.0023	0.0012	0.0038	0.0031		0.0028	0.0012	0.0047	0.0018	0.0027		0.02	0.0028	0.0029	0.0036	0.003		0.0029	0.0025	0.0017	0.031	0.0012		0.0019	0.0035	0.0021	0.0017	0.00092		0.0019	0.0022	0.0011
Ce140	0.0036	<0.00	0.0027	0.0022	0.0034	0.0023	0.0018	0.0031		0.003	0.0027	0.0018	0.0046	0.0028		0.0022	0.003	0.0083	0.0027	0.0044		0.033	0.0066	0.0033	0.0028	0.0019		0.0049	0.002	0.0019	0.0054	0.0037		0.0033	0.0035	0.0026	0.0025	0.0013		0.0017	0.0046	0.0033
Pr141	0.002	0.0011	0.0015	0.0018	0.0021	0.0029	0.0023	0.0025		0.0015	0.0015	0.0023	0.0023	0.0012		0.0028	0.0018	0.002	0.0015	0.0018		0.0094	0.002	0.0022	0.0023	<0.00		0.0023	0.0015	0.0011	0.002	0.0014		0.0019	0.002	0.0019	0.0018	0.00078		0.0017	0.0017	0.00095
Nd146	0.013	0.019	0.011	0.014	0.017	0.019	0.017	0.015		0.017	0.017	<0.00	0.015	0.016		0.026	0.02	0.015	0.012	0.021		0.047	0.014	0.013	<0.00	0.0095		0.02	0.018	0.01	0.011	0.01		0.0084	0.019	0.019	0.017	0.012		0.015	0.01	0.014
Sm149	0.013	0.013	0.019	0.017	0.012	0.01	0.015	0.018		0.008	0.014	0.011	0.016	0.013		0.0098	0.0078	0.016	0.015	0.011		0.024	0.015	0.014	0.013	0.0083		0.0091	0.0057	0.0059	0.009	0.0082		0.0072	0.0088	0.0065	0.011	<0.00		0.012	0.01	0.014
Eu151	0.0042	0.007	0.0044	0.006	0.0042	0.0047	0.0029	0.0051		0.0057	0.0036	0.0056	0.0048	0.0076		0.0061	0.0042	0.0084	0.0033	0.0072		0.0064	0.0053	0.0025	0.0054	0.0053		0.0024	<0.00	0.0025	0.0028	0.0039		0.0035	<0.00	0.0028	0.0042	0.0019		0.0032	0.0049	0.003
Gd157	0.02	0.031	0.013	0.012	0.024	<0.00	0.051	0.019		0.018	0.031	0.03	0.019	0.028		0.017	0.027	0.021	0.027	0.027		0.027	0.025	0.015	0.016	0.019		0.013	0.015	0.01	0.0097	0.016		0.0089	0.018	0.011	0.0075	0.016		0.013	0.023	0.021
Tb159	0.0024	0.0034	0.0027	0.0046	0.0031	0.0049	0.003	0.0039		0.0043	0.0043	0.0032	0.0047	0.0028		0.0047	0.0049	0.0043	0.0044	0.0048		0.0027	0.0039	0.0039	0.0032	0.0032		0.0017	0.0019	0.0013	0.0021	0.0017		<0.00	0.0014	0.0019	0.0017	0.0021		0.0029	0.0045	0.0048
Dy161	0.016	0.016	0.018	0.02	0.02	0.016	0.024	0.018		0.016	0.018	0.018	0.02	0.016		0.033	0.023	0.036	0.024	0.031		0.022	0.019	0.017	0.016	0.019		0.0093	0.0072	0.014	0.0072	0.0029		0.017	0.011	0.012	0.0077	0.0061		0.022	0.027	0.03
Ho165	0.006	0.0043	0.0042	0.0049	0.0068	0.0058	0.0056	0.0065		0.0042	0.0055	0.0042	0.0042	0.0035		0.0086	0.004	0.0081	0.0066	0.01		0.0049	0.0059	0.0056	0.0058	0.0043		0.0026	0.0025	0.0028	0.0021	0.0017		0.0037	0.0018	0.0024	0.0017	0.0031		0.0051	0.0062	0.007
Er166	0.022	0.024	0.021	0.016	0.016	0.021	0.013	0.03		0.013	0.019	0.016	0.019	0.018		0.036	0.022	0.028	0.024	0.041		0.024	0.017	0.025	0.022	0.021		0.0074	0.0086	0.014	0.0069	0.0075		0.0054	0.0073	0.0095	0.0052	0.01		0.017	0.025	0.028
Tm169	0.0047	0.0059	0.0051	0.0049	0.0062	0.0048	0.0078	0.006		0.0031	0.0042	0.0045	0.0038	0.0044		0.01	0.0039	0.0096	0.0079	0.011		0.0057	0.0057	0.0077	0.0068	0.0055		0.003	0.0026	0.0018	0.0019	0.0019		0.0011	0.002	0.0024	0.0029	0.0019		0.0034	0.0059	0.0065
Yb172	0.034	0.035	0.031	0.034	0.044	0.049	0.043	0.04		0.019	0.019	0.023	0.018	0.027		0.045	0.031	0.049	0.043	0.061		0.035	0.049	0.045	0.038	0.046		0.012	0.014	0.019	0.0084	0.011		0.038	0.0079	0.015	0.014	0.014		0.03	0.047	0.045
Lu175	0.0099	0.0097	0.0073	0.0086	0.01	0.0074	0.01	0.0057		0.0033	0.0036	0.006	0.0047	0.0043		0.0075	0.0045	0.009	0.0074	0.012		0.0082	0.01	0.012	0.0074	0.0082		0.0023	0.0024	0.0036	0.0022	0.002		0.0055	0.0034	0.0033	0.0027	0.0023		0.0041	0.0078	0.0084
Hf178	0.02	0.023	0.017	0.012	0.03	<0.00	0.017	0.023		0.028	0.016	0.024	0.018	0.019		<0.00	0.015	0.014	0.0083	0.017		<0.00	0.026	<0.00	0.013	0.01		0.005	0.011	0.011	0.0053	0.0071		0.0075	0.013	0.0096	<0.00	0.011		0.011	<0.00	0.01
Ta181	0.0036	0.004	0.0018	0.0033	0.0016	0.0037	0.0032	0.0038		0.0024	0.0029	0.0024	<0.00	0.0041		0.0018	0.0014	0.0029	<0.00	0.0025		0.0036	0.0023	0.0015	0.0022	0.0022		0.0011	<0.00	<0.00	0.0014	0.0016		0.0023	0.0011	0.002	0.0023	<0.00		0.00093	0.0019	0.00089
Pb208	0.0041	0.015	0.015	0.013	0.0094	0.012	0.017	0.02		0.0069	0.01	0.013	0.011	0.012		0.012	0.0086	0.0082	0.0071	0.0074		0.0098	0.0043	0.0072	0.0043	0.0036		0.0079	0.013	0.01	0.0063	0.0053		0.007	0.0079	0.0066	0.0069	0.0053		0.0083	0.006	0.016
Th232	0.0023	0.0032	0.0033	0.0031	0.0017	0.0034	<0.00	0.0034		0.0023	<0.00	0.0016	0.0032	0.0039		0.0017	0.0024	0.0036	0.0027	0.0041		0.011	<0.00	0.0022	0.0028	0.0028		0.0022	0.002	0.002	0.0019	<0.00		0.002	0.0025	0.002	<0.00	0.0022		0.0081	0.00089	0.00095
U238	<0.00	0.0017	0.0016	0.0026	0.0021	0.022	0.0062	0.0023		0.0079	0.002	0.0032	0.0012	0.0022		0.011	0.0029	0.0013	0.0085	0.004		0.0034	0.0023	0.0013	<0.00	0.0023		0.0012	0.00087	0.00092	0.0086	0.011		0.0023	0.0097	0.00089	0.002	0.00089		<0.00	<0.00	0.00082
Minimum detection limits (99% confidence).
Element	olv3	olv4	olv4b2	olv5	olv8	olv9	olv14b	olv15c		olv14	olv15a	olv16	olv19	olv19-3		Olv4	Olv8a	Olv10	Olv11	Olv12		olv-14	olv-15	olv-16	olv-17	olv-19		Olv-2-1	olv-3-1-8	Olv3-2-9	Olv1-1-10	Olv1-2-11		Olv-1-1-7	Olv-4-2-10	Olv-2-1-16b	Olv-3-1-5	Olv-3-2-6		Olv1-1	Olv2-2	Olv2-3
P31	4.4	4.33	4.11	4.16	4.06	4.63	3.65	3.89		4.67	4.87	4.66	5.42	5.43		4.22	4.34	4.65	4.33	4.39		5.53	5.02	4.91	5	5.07		6.55	7.39	7	6.46	5.75		7.61	7.63	8.28	7.39	6.75		6.18	6.52	6.06
Ca42	63.25	62.85	58.59	60.94	59.72	68.01	53.5	58.74		51.75	54.17	51.09	57.56	58.5		54.9	55.14	60.35	54.93	57.11		57.56	55.33	52.07	54.19	51.88		56.21	61.63	59.1	53.48	49.55		60.51	55.4	60.61	53.01	52.85		61.54	61.82	60.41
Sc45	0.113	0.123	0.116	0.11	0.116	0.128	0.114	0.105		0.133	0.134	0.136	0.156	0.149		0.105	0.0959	0.106	0.111	0.108		0.136	0.121	0.128	0.127	0.128		0.0861	0.094	0.103	0.0866	0.0885		0.107	0.116	0.123	0.112	0.0979		0.0972	0.109	0.0976
Ti49	0.259	0.345	0.313	0.366	0.318	0.245	0.375	0.366		0.419	0.333	0.401	0.391	0.196		0.328	0.263	0.23	0.211	0.348		0.372	0.193	0.231	0.301	0.231		0.609	0.316	0.337	0.487	0.895		0.625	0.494	0.598	0.567	0.507		0.199	0.205	0.332
V51	0.035	0.0374	0.0326	0.0385	0.0317	0.0432	0.0308	0.0376		0.0452	0.047	0.0347	0.0407	0.047		0.0438	0.0448	0.0421	0.0398	0.0416		0.0515	0.0456	0.0438	0.0454	0.0416		0.0604	0.0573	0.0457	0.0437	0.0537		0.0521	0.053	0.0447	0.0399	0.0363		0.0586	0.0561	0.047
Cr52	0.81	0.804	0.787	0.803	0.791	0.902	0.713	0.792		0.915	0.947	0.891	1.04	1.06		0.912	0.926	0.997	0.906	0.936		1.11	1.08	1.02	1.05	1.01		0.683	0.782	0.722	0.666	0.621		0.803	0.786	0.803	0.751	0.714		0.681	0.717	0.665
Mn55	0.169	0.168	0.164	0.163	0.157	0.183	0.154	0.157		0.208	0.201	0.204	0.231	0.242		0.168	0.175	0.181	0.174	0.176		0.233	0.218	0.217	0.228	0.231		0.123	0.139	0.131	0.116	0.12		0.14	0.139	0.15	0.131	0.133		0.112	0.116	0.105
Co59	0.0136	0.0112	0.0144	0.0129	0.0147	0.0151	0.0133	<0.00000		0.00779	0.0141	0.0183	0.0155	0.0127		0.0081	0.00771	0.00873	<0.00000	0.0115		0.0145	0.0184	<0.00000	0.0128	0.00899		0.0225	0.0195	<0.00000	<0.00000	0.0127		0.0125	0.0179	0.0187	0.0118	0.0194		<0.00000	<0.00000	0.00825
Ni62	0.0669	0.0551	0.071	0.0897	0.081	0.0857	0.0805	0.0792		0.0866	0.0571	0.0527	0.0445	0.1		0.0704	<0.00000	0.044	0.0404	0.0709		0.0897	0.0932	0.0645	0.103	0.0791		0.0849	<0.00000	0.102	0.093	0.0761		0.0841	0.0606	<0.00000	0.0565	0.0758		0.0417	0.0431	0.0402
Cu65	0.074	0.0578	0.0429	0.0442	0.0535	0.0893	0.0483	0.0581		0.0826	0.0858	0.0322	0.0861	0.0546		0.0618	0.0481	0.0771	0.0707	0.0621		0.092	0.0828	0.0702	0.0409	0.0811		0.0925	0.105	0.0969	0.0887	0.0918		0.0877	0.0894	0.0764	0.0836	0.102		0.0742	0.101	0.107
Zn66	0.164	0.145	0.139	0.169	0.155	0.139	0.143	0.159		0.151	0.188	0.161	0.206	0.172		0.165	0.195	0.209	0.157	0.169		0.225	0.167	0.181	0.199	0.181		0.149	0.191	0.201	0.204	0.157		0.225	0.267	0.24	0.162	0.172		0.263	0.239	0.226
Ga71	0.0153	0.0109	0.0223	0.0251	0.0248	0.0317	0.0225	0.0221		<0.00000	0.029	0.0154	0.0184	0.0226		0.0234	0.0274	0.0179	0.0233	0.0313		0.0261	0.0427	0.0187	0.0298	0.0264		0.0313	0.0286	0.0263	0.0269	0.0227		0.0315	0.0227	0.0291	0.0213	0.0202		0.0215	0.0249	0.0255
Rb85	0.0142	0.0143	0.013	0.0113	0.0112	0.0186	0.0119	0.0144		0.0154	0.0142	0.0121	0.0166	0.0144		0.00939	0.0136	0.00826	0.00535	0.0133		0.0139	0.00877	0.0105	0.0105	0.0169		0.0136	0.0172	0.0169	0.0149	0.014		0.0173	0.0206	0.0201	0.015	0.0212		0.017	0.0152	0.0159
Sr88	0.00487	0.00694	0.00773	0.0046	0.00909	0.00929	<0.00000	<0.00000		0.00925	0.00682	0.00445	<0.00000	0.00534		0.00667	0.00634	0.00508	0.00931	0.00472		<0.00000	0.00931	0.00525	<0.00000	0.00907		0.0111	0.00581	0.00378	0.0223	0.0181		0.00442	0.00901	0.00471	0.00843	0.00692		<0.00000	0.00575	0.00535
Y89	0.00792	0.0113	<0.00000	0.00747	0.00737	0.00868	0.00664	0.00797		0.0175	0.00693	0.0111	0.0108	0.0109		<0.00000	<0.00000	0.00581	0.0107	0.00763		0.00963	0.00612	0.00599	0.00605	0.00848		0.00393	0.00879	0.00405	0.00523	0.00348		0.00672	0.00485	0.00509	0.00455	0.00432		<0.00000	0.00363	<0.00000
Zr90	0.0338	0.0152	0.0195	<0.00000	0.0198	0.0285	0.0126	0.015		0.0178	<0.00000	0.0121	0.0145	0.0146		<0.00000	0.0144	0.0163	0.0106	0.0107		<0.00000	0.0119	<0.00000	<0.00000	0.0117		0.00791	<0.00000	<0.00000	<0.00000	0.0233		0.0135	<0.00000	0.0102	0.00916	0.0123		<0.00000	<0.00000	0.00958
Nb93	0.00913	<0.00000	<0.00000	0.00609	0.00602	0.00709	0.00543	0.00652		0.00605	0.00892	0.00822	0.00983	0.00987		<0.00000	<0.00000	<0.00000	<0.00000	0.00637		0.00791	0.01	0.00695	<0.00000	0.012		0.00916	0.0083	0.00539	0.00695	0.00926		0.00888	0.00905	0.00948	<0.00000	0.00569		0.00649	0.00473	0.00623
Mo95	0.0328	0.0331	0.0604	<0.00000	0.0616	0.0515	0.0559	0.0477		0.0327	<0.00000	0.0541	0.0527	0.0746		0.0609	<0.00000	0.054	0.0496	0.0356		0.044	0.056	0.0388	0.0392	0.039		<0.00000	0.0537	0.0286	0.0522	0.0349		0.0585	0.0487	0.051	0.0322	0.0432		0.0505	<0.00000	0.0341
Sn118	0.285	0.287	0.285	0.299	0.281	0.329	0.25	0.304		0.24	0.248	0.245	0.285	0.285		0.226	0.241	0.289	0.225	0.257		0.282	0.256	0.244	0.274	0.247		0.226	0.247	0.239	0.22	0.203		0.266	0.265	0.272	0.26	0.243		0.244	0.263	0.239
Sb121	0.0385	0.0335	0.0457	0.0306	0.046	0.0448	0.034	0.0253		0.0489	0.0397	0.03	0.0441	0.0574		0.0566	0.0679	0.068	0.0688	0.0308		<0.00000	0.0298	0.0411	0.0584	0.0408		0.0468	0.049	0.0535	0.0483	0.0521		<0.00000	0.0523	0.0489	0.0256	0.0247		0.0569	0.0414	0.0609
Cs133	0.00642	0.00324	0.00513	0.00306	0.00605	0.00509	0.00276	0.00749		0.00376	0.00276	0.00508	0.00429	0.00526		0.00328	0.00635	0.00362	0.00335	0.00483		0.00609	0.00544	0.00915	<0.00000	0.00369		0.00421	0.00444	<0.00000	0.0044	0.00238		<0.00000	<0.00000	0.00376	0.00475	0.00319		0.00426	<0.00000	0.00337
Ba137	<0.00000	0.0298	0.0383	0.0395	0.0618	0.0462	0.0251	0.0427		0.0405	0.0422	0.0476	0.0657	<0.00000		<0.00000	<0.00000	0.0331	0.0304	0.0308		<0.00000	0.0345	<0.00000	0.048	<0.00000		0.0432	0.0385	0.0553	0.0318	0.0423		0.0289	0.0417	<0.00000	0.0276	0.0261		<0.00000	<0.00000	0.0214
La139	0.00817	0.00673	0.00749	0.00446	0.00623	0.0104	0.00689	<0.00000		0.00417	<0.00000	0.00404	0.00483	0.00487		0.00585	0.00393	0.00445	0.00577	0.00413		<0.00000	0.00655	<0.00000	0.00795	0.00455		0.00658	0.00512	0.00331	0.00522	0.00401		<0.00000	0.0067	<0.00000	<0.00000	<0.00000		0.00294	0.00303	<0.00000
Ce140	0.00404	<0.00000	<0.00000	0.00382	0.00653	<0.00000	0.00341	<0.00000		0.00383	0.00693	0.00369	0.00625	0.00628		<0.00000	0.00555	0.0089	0.00577	<0.00000		0.00512	<0.00000	0.0078	0.00786	<0.00000		0.00888	<0.00000	<0.00000	0.0053	0.00863		<0.00000	0.00554	<0.00000	0.00366	<0.00000		<0.00000	<0.00000	<0.00000
Pr141	<0.00000	0.00354	0.00322	0.00469	0.00463	0.00547	0.00296	0.00617		0.00474	<0.00000	0.00322	<0.00000	0.00387		0.0035	0.00471	0.00533	0.00489	0.0035		<0.00000	<0.00000	0.00379	0.00541	<0.00000		0.00542	0.00301	<0.00000	0.00253	0.00337		0.00321	0.00327	0.00342	0.00529	<0.00000		<0.00000	<0.00000	<0.00000
Nd146	<0.00000	0.0333	<0.00000	0.0312	0.0308	0.0512	0.0392	0.0332		0.0308	0.0321	<0.00000	<0.00000	<0.00000		0.0428	0.05	<0.00000	<0.00000	0.0608		0.052	<0.00000	<0.00000	<0.00000	<0.00000		<0.00000	0.0508	0.033	<0.00000	0.0284		0.0272	0.048	0.029	0.0448	0.0245		<0.00000	<0.00000	0.0203
Sm149	0.0415	0.0419	0.0271	<0.00000	0.0278	0.033	0.036	0.0309		0.026	<0.00000	0.0358	0.0304	0.0433		<0.00000	0.0251	<0.00000	0.0261	0.0265		0.0318	<0.00000	0.0281	0.0401	<0.00000		0.019	<0.00000	0.0193	0.0176	0.0166		0.0232	<0.00000	<0.00000	<0.00000	<0.00000		0.0179	<0.00000	0.0171
Eu151	0.0115	0.0163	0.0074	0.0132	<0.00000	0.00882	0.00953	0.014		0.0112	0.00827	<0.00000	0.0129	0.0159		<0.00000	<0.00000	0.0125	<0.00000	<0.00000		0.0141	<0.00000	<0.00000	0.0153	0.0152		0.00595	<0.00000	<0.00000	<0.00000	0.00734		<0.00000	<0.00000	<0.00000	<0.00000	0.00627		0.00553	<0.00000	<0.00000
Gd157	0.0403	0.0408	<0.00000	0.0386	0.054	<0.00000	0.07	0.0601		<0.00000	<0.00000	0.0374	<0.00000	0.045		0.0347	0.057	<0.00000	<0.00000	0.0344		0.0582	0.0645	0.0367	0.0372	0.0526		0.0244	<0.00000	<0.00000	0.0229	0.0305		0.0288	0.0507	<0.00000	<0.00000	0.0258		<0.00000	0.0234	<0.00000
Tb159	0.0058	0.00585	<0.00000	0.00551	<0.00000	0.00645	0.007	0.00845		0.00781	<0.00000	0.00529	0.0109	0.00634		<0.00000	0.00442	0.005	<0.00000	0.00654		0.00545	0.00492	<0.00000	0.00489	0.00487		0.00305	0.00343	<0.00000	0.00289	<0.00000		<0.00000	<0.00000	0.00398	<0.00000	0.00476		0.003	<0.00000	0.00286
Dy161	<0.00000	0.024	<0.00000	0.0504	0.0315	0.0373	0.0286	0.0244		0.0219	0.0324	0.0299	0.0253	0.0254		0.0183	0.0174	<0.00000	0.0179	0.0256		<0.00000	0.0275	0.0191	<0.00000	0.0386		<0.00000	<0.00000	0.0172	<0.00000	<0.00000		0.0142	0.0206	<0.00000	0.0137	<0.00000		0.0111	<0.00000	0.0107
Ho165	<0.00000	0.00637	<0.00000	0.00848	0.00593	<0.00000	<0.00000	<0.00000		0.00757	<0.00000	0.0052	0.00624	<0.00000		0.00464	<0.00000	<0.00000	0.0046	<0.00000		<0.00000	0.00528	0.00731	0.00522	0.00734		0.00615	0.00343	0.00315	0.00288	<0.00000		<0.00000	0.00372	0.00551	<0.00000	0.0033		<0.00000	<0.00000	0.00277
Er166	0.019	0.0332	0.0174	0.0179	<0.00000	0.036	0.0224	0.0269		0.0239	0.0176	0.023	0.0275	<0.00000		0.0199	0.0133	0.0213	0.0238	0.0139		0.017	0.0217	0.0213	0.0341	<0.00000		0.00907	0.0102	0.00939	<0.00000	0.0081		<0.00000	<0.00000	<0.00000	0.0104	<0.00000		<0.00000	0.00911	0.00848
Tm169	0.00873	<0.00000	<0.00000	0.0058	0.00809	<0.00000	0.00514	<0.00000		<0.00000	0.00979	<0.00000	0.00621	0.00622		0.00482	0.00458	<0.00000	0.00474	0.0048		0.00855	<0.00000	0.00752	0.00536	0.00752		0.00446	<0.00000	<0.00000	<0.00000	0.00271		0.00363	<0.00000	0.00388	0.00347	<0.00000		0.00292	0.003	0.00279
Yb172	0.0465	0.0575	0.0606	0.0313	0.0437	0.0733	0.0398	<0.00000		0.0292	0.031	0.0288	0.0347	0.0497		0.0258	0.0348	<0.00000	0.0256	0.0368		<0.00000	0.0294	0.0576	<0.00000	0.0289		<0.00000	0.0204	0.0185	<0.00000	<0.00000		0.0363	<0.00000	<0.00000	0.028	0.0187		0.0164	<0.00000	<0.00000
Lu175	<0.00000	<0.00000	0.00541	0.00559	0.00553	0.00657	0.00505	<0.00000		<0.00000	0.00755	0.00495	<0.00000	<0.00000		0.00474	<0.00000	0.00713	0.0046	0.00655		<0.00000	0.00494	0.00487	0.00698	0.00492		0.00299	0.00333	<0.00000	<0.00000	<0.00000		0.00363	<0.00000	0.0039	<0.00000	0.00332		<0.00000	<0.00000	<0.00000
Hf178	0.0403	0.0575	0.0368	0.0379	0.0374	<0.00000	0.0336	0.0402		0.0511	0.0379	0.0782	0.0419	0.0422		<0.00000	0.0273	<0.00000	<0.00000	<0.00000		<0.00000	0.0329	<0.00000	<0.00000	0.0325		<0.00000	0.0306	0.0345	<0.00000	0.0172		0.0243	<0.00000	<0.00000	<0.00000	0.0312		0.0187	<0.00000	<0.00000
Ta181	0.00937	0.00774	<0.00000	0.00896	<0.00000	0.00863	0.00813	0.0057		<0.00000	0.00922	0.00491	<0.00000	0.0102		<0.00000	<0.00000	<0.00000	<0.00000	0.00677		<0.00000	0.00744	<0.00000	0.0052	0.00516		0.0035	<0.00000	<0.00000	0.00322	0.00429		0.00727	<0.00000	0.00638	0.00404	<0.00000		<0.00000	0.00338	<0.00000
Pb208	0.00762	0.0144	0.0122	0.0102	0.0101	0.00848	0.00797	0.00786		0.0101	0.016	0.00553	0.00929	0.0131		0.00668	0.0179	0.0143	0.0173	0.0132		0.0226	0.0072	0.0173	0.0101	<0.00000		0.0105	0.0103	0.0134	0.0112	0.0116		0.0107	0.0125	0.00926	0.00827	0.00554		0.0106	0.0109	0.0152
Th232	<0.00000	0.00822	<0.00000	0.00546	<0.00000	<0.00000	<0.00000	0.0059		0.00756	<0.00000	0.00513	0.00868	<0.00000		<0.00000	0.00773	0.00506	<0.00000	0.00472		<0.00000	<0.00000	<0.00000	<0.00000	0.00761		0.00596	0.00539	<0.00000	0.0045	<0.00000		<0.00000	0.00566	0.00418	<0.00000	0.00353		0.0032	<0.00000	0.00307
U238	<0.00000	<0.00000	<0.00000	<0.00000	0.00465	<0.00000	0.00418	0.00354		<0.00000	0.00373	<0.00000	<0.00000	0.00411		0.00692	0.00379	0.00429	<0.00000	0.00397		<0.00000	0.00626	0.00435	<0.00000	0.00619		0.00289	<0.00000	0.00297	0.00271	0.00362		<0.00000	<0.00000	<0.00000	0.00525	0.00286		<0.00000	<0.00000	0.00267
