# Supplementary material
Source: MDPI journal article supplement (https://www.mdpi.com/2075-163X/12/6/775)

Supplementary Material SE. Compositional variation of clinopyroxene crystals from the main intrusions of PN.  $Mg\#_{cpx}$  vs trace element compositions (ppm) are presented, contrasting antecryst relict cores (pale brown field) with Ti-augite mantling and rims. Mantling and rims indicate a progressive enrichment in incompatible elements (e.g., REE, Zr, Sr) and impoverishment in compatible ones (e.g., Ni) with the decrease of  $Mg\#_{cpx}$

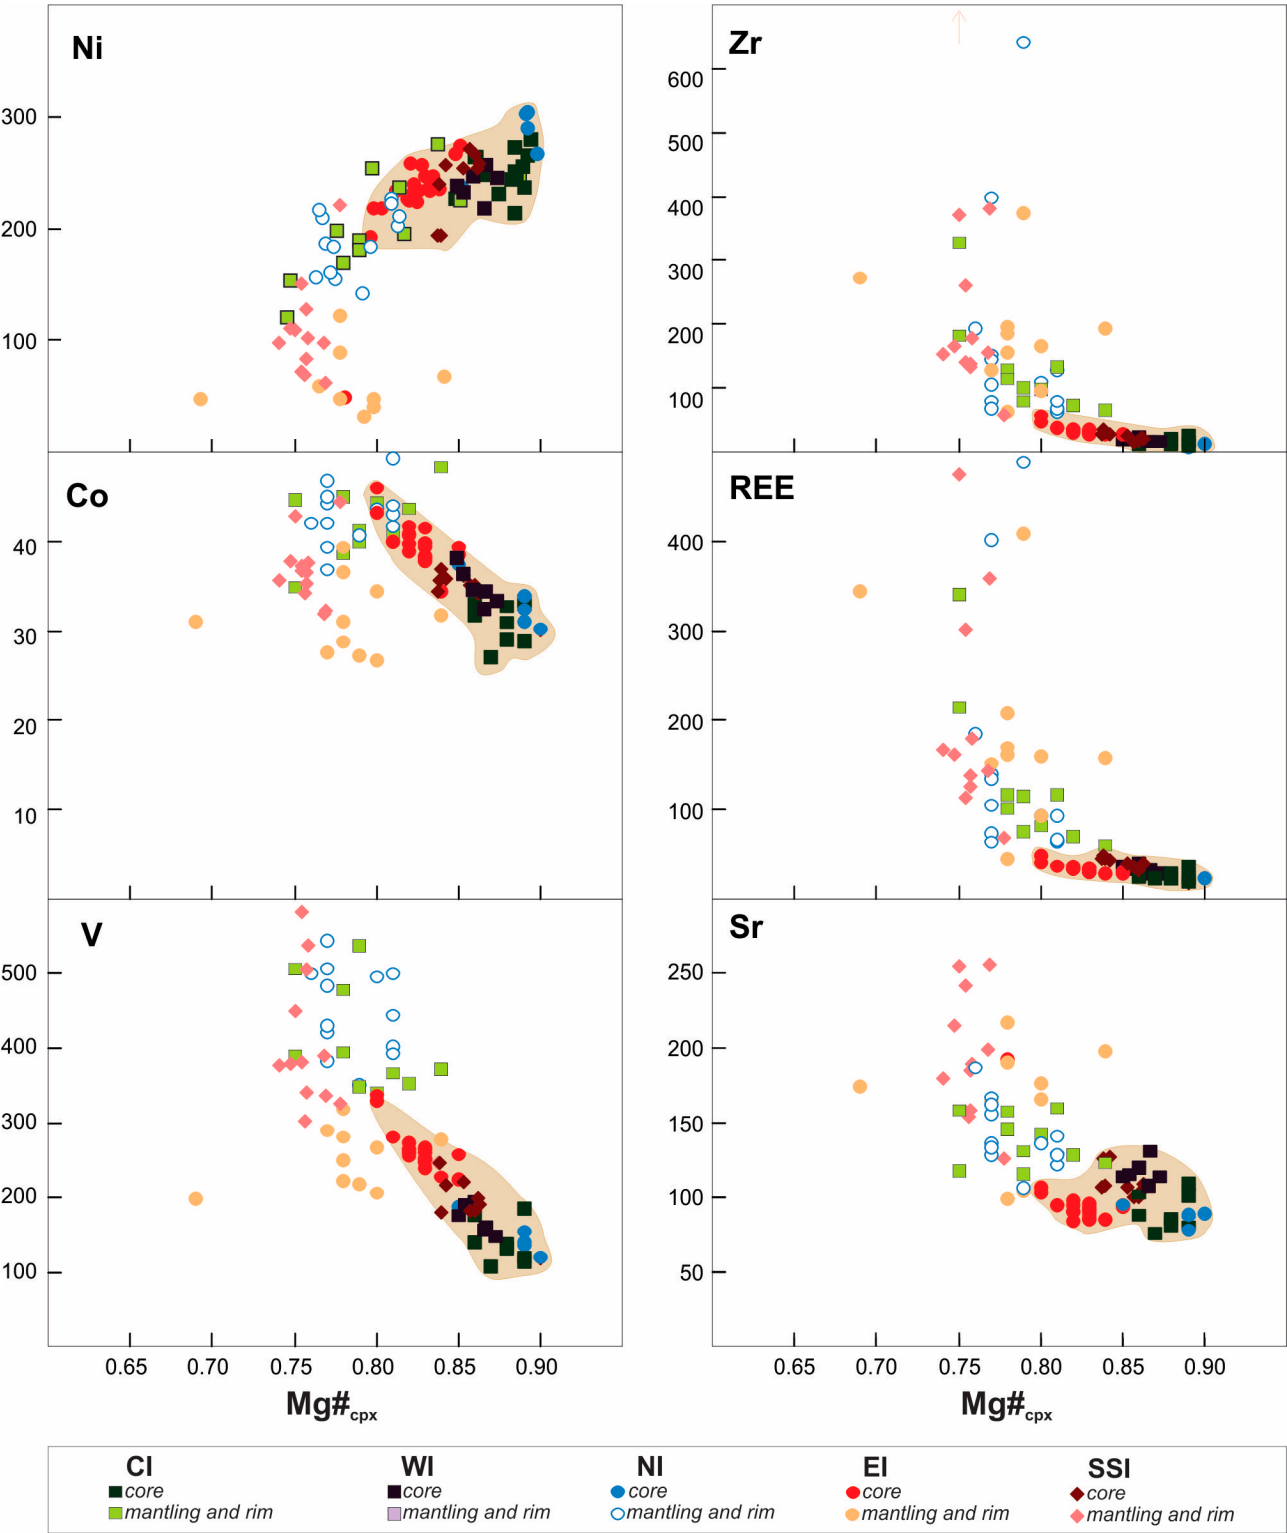

Supplement: s1 [file s1 › Supplem Mat E - figure _revision.pdf]
