# Supplementary material
Source: MDPI journal article supplement (https://www.mdpi.com/2075-163X/12/6/775)
Supplement: s1 [file s1 › Supplem Mat F - P-T calculated.xls]

## Sheet: Labels
Supplemental material F. Calculated P and T parameters for the Ponte Nova antecrystic clinopyroxene/primitive liquids of Mantiqueira range pairs
Table SF1. CpxPN-Liq: Spreadsheet adapted from Neave et al. (2019), with the composition of 28 pairs of clinopyroxene relict cores of PN with putative liquid compositions (Mantiqueira range primitive dikes) used to estimate the crystallization pressure and temperature of the clinopyroxene antecrysts of PN,
	applying equilibrium constant (KD) and multicomponent equilibrium tests.
Table SF2. CpxDike-Liq: Spreadsheet adapted from Neave et al. (2019), with the composition of one pair of clinopyroxene -liquid from the Mantiqueira Range used to estimate the crystallization pressure and temperature of the dikes,
	applying equilibrium constant (KD) and multicomponent equilibrium tests.
Table SF3. Rhodes Diag Calc: The Rhodes diagram showing the KD equilibrium test
Table SF4. DiHd, EnFs and CaTs Equilib: Multicomponent equilibrium diagram comparing predicted (theoretical calculated) clinopyroxene components with observed clinopyroxene components for DiHd, EnFs, and CaTs
*For further details see Neave and Putirka (2017) and Neave et al. (2019)

## Sheet: SF1. CpxPN-Liq
Spreadsheet modified from Neave et al. 2019
																													Estimation of intensive parameters (P-T)			Test KD(Fe-Mg)^(Cpx-Liq) equilibrium			Test DiHd and CaTs equilibrium
Metadate		Clinopyroxene Compositions in Weight Percent													Liquid Compositons in Weight Percent														Eq 33 Putirka (2008)		Nerve & Putirka (2017)	Eq Rhodes et al. (1979)	Eq 35 Putirka (2008)		Predicted Cpx Components (Putirka, 1999; Mollo et al., 2013)				Observed Cpx components (Putirka et al., 1996)
Intrusion	Sample/Analysis /Location	SiO2	TiO2	Al2O3	FeOt	MnO	MgO	CaO	Na2O	K2O	Cr2O3	Total	100*Mg#Cpx	Cations Sum (6O)	Sample	SiO2	TiO2	Al2O3	FeOt	MnO	MgO	CaO	Na2O	K2O	Cr2O3	P2O5	H2O	100*Mg#Liq	T (K)	T (°C)	P (kbar)	KD (Fe-Mg)	KD (Fe-Mg)	ΔKd (<0.03)	DiHd	EnFs	CaTs		DiHd	EnFs	CaTs		ΔDiHd (SEE 0.06)	ΔEnFs (SEE 0.05)	ΔCaTs (SEE 0.03)
CI	r163-10-n	51.439	0.765	2.853	3.848	0.083	16.47	22.613	0.416	0	1.09	99.577	88.4122	4.02049	MT-74F	42.72	2.18	12.77	10.2487	0.17	10.22	10.03	2.67	2.2	0	1.38	2.72	67.6511	1406.38	1133.23	3.38044	0.274097	0.289205	0.0151084	0.82369	0.124509	0.00704143		0.824535	0.0993607	0		0.000844971	0.0251485	0.00704143
CI	r87a-3-n	50.406	0.909	3.645	3.997	0.028	15.782	22.665	0.403	0	0.438	98.273	87.5599	4.02055	MT-74F	42.72	2.18	12.77	10.2487	0.17	10.22	10.03	2.67	2.2	0	1.38	2.72	67.6511	1425.19	1152.04	5.85555	0.297122	0.296116	0.00100556	0.789806	0.112707	0.00688425		0.834566	0.0842962	0.0130684		0.0447606	0.0284105	0.00618413
NI	r41a-1-cpx3 n	51.86	0.61	2.78	3.79	0.07	17.47	22.17	0.51	0	1.06	100.32	89.1503	4.03268	MT-74F	42.72	2.18	12.77	10.2487	0.17	10.22	10.03	2.67	2.2	0	1.38	2.72	67.6511	1396.4	1123.25	1.32054	0.254512	0.283362	0.0288497	0.835266	0.147183	0.00789017		0.798758	0.133934	0		0.0365076	0.0132495	0.00789017
NI	r41-Cpx2_1-Nc_3	51.864	0.606	2.781	3.794	0.07	17.47	22.169	0.514	0	1.055	100.323	89.1401	4.03289	MT-74F	42.72	2.18	12.77	10.2487	0.17	10.22	10.03	2.67	2.2	0	1.38	2.72	67.6511	1397.02	1123.87	1.38418	0.254781	0.283529	0.0287482	0.834044	0.146946	0.00789475		0.798821	0.13395	0		0.0352226	0.0129956	0.00789475
CI	r87a-1-n	50.816	1.044	3.516	4.162	0.05	16.19	22.886	0.419	0	0.362	99.445	87.3964	4.02713	MT-74F	42.72	2.18	12.77	10.2487	0.17	10.22	10.03	2.67	2.2	0	1.38	2.72	67.6511	1429.52	1156.37	6.04514	0.30159	0.296553	0.00503708	0.782338	0.110553	0.00677691		0.838956	0.0905659	0.000109346		0.0566178	0.0199869	0.00666756
CI	r116-2-n	50.432	0.883	3.532	4.323	0.08	16.2	22.062	0.406	0	0.657	98.575	86.9793	4.02421	MT-74F	42.72	2.18	12.77	10.2487	0.17	10.22	10.03	2.67	2.2	0	1.38	2.72	67.6511	1438.99	1165.84	6.19127	0.313064	0.296535	0.0165289	0.76441	0.127328	0.00800484		0.807951	0.113137	0.00424223		0.0435404	0.0141917	0.00376261
CI	r163-13-cpx n2	50.15	0.86	2.67	3.87	0.06	16.55	21.91	0.28	0	0.37	96.72	88.4034	4.02176	MT-74F	42.72	2.18	12.77	10.2487	0.17	10.22	10.03	2.67	2.2	0	1.38	2.72	67.6511	1406.57	1133.42	2.99502	0.274331	0.288081	0.0137494	0.821502	0.121632	0.00675385		0.832812	0.111968	0		0.01131	0.00966415	0.00675385
EI	r30-Cpx4_1-Nc1	50.6	1.4	3.94	5.12	0.04	16.12	22.73	0.42	0	0.47	100.84	84.8769	4.03265	MT-72B	44.61	2.313	14.98	9.32199	0.159	7.27	8.87	4.33	2.6	0	1.25	2.3	62.057	1398.92	1125.77	4.75058	0.291415	0.27852	0.012895	0.753103	0.105016	0.00853895		0.810513	0.112861	0		0.0574108	0.00784491	0.00853895
NI	r97-2-n	51.051	1.194	3.698	4.925	0.129	15.61	23.109	0.346	0	0.399	100.461	84.9624	4.0202	P_MT-68A	39.27	3.578	11.6	11.6345	0.23	8.48	12.46	4.59	1.58	0	1.447	3.2	60.4518	1426.54	1153.39	4.38412	0.270541	0.282555	0.0120143	0.799177	0.0776874	0.00648005		0.835165	0.0849671	0.00871153		0.0359886	0.00727969	0.00223148
CI	r119b-1-n	48.233	2.694	6.087	4.583	0.103	14.193	23.232	0.474	0	0	99.599	84.6637	4.01916	P_MT-68A	39.27	3.578	11.6	11.6345	0.23	8.48	12.46	4.59	1.58	0	1.447	3.2	60.4518	1435.36	1162.21	6.45124	0.276889	0.288131	0.0112423	0.780025	0.0827286	0.0075215		0.807541	0.0598589	0.0216961		0.0275156	0.0228697	0.0141746
WI	r35d-2-n	50.912	1.325	3.779	5.167	0.09	16.175	21.508	0.438	0	0.739	100.133	84.8031	4.01647	P_MT-68A	39.27	3.578	11.6	11.6345	0.23	8.48	12.46	4.59	1.58	0	1.447	3.2	60.4518	1465.96	1192.81	6.508	0.27392	0.287139	0.0132193	0.727466	0.100133	0.00934158		0.769507	0.13744	0.00239425		0.0420416	0.037307	0.00694733
CI	r120-2-n 1	49.539	1.379	4.326	5.291	0.128	15.468	22.434	0.466	0	0.518	99.549	83.9004	4.03542	P_MT-68A	39.27	3.578	11.6	11.6345	0.23	8.48	12.46	4.59	1.58	0	1.447	3.2	60.4518	1450.55	1177.4	5.9015	0.293314	0.286025	0.00728973	0.757663	0.0865742	0.00774502		0.805685	0.107708	0		0.0480214	0.0211343	0.00774502
CI	r163-12-n	50.855	1.342	3.315	5.465	0.12	15.64	22.417	0.368	0	0.331	99.853	83.6106	4.01933	P_MT-68A	39.27	3.578	11.6	11.6345	0.23	8.48	12.46	4.59	1.58	0	1.447	3.2	60.4518	1433.44	1160.29	4.35828	0.299628	0.282239	0.0173893	0.7864	0.0828689	0.00696742		0.822617	0.103999	0		0.0362168	0.0211302	0.00696742
CI	r83-1-n	50.202	1.284	3.847	5.612	0.079	15.63	21.718	0.431	0	0.398	99.201	83.2347	4.02273	P_MT-68A	39.27	3.578	11.6	11.6345	0.23	8.48	12.46	4.59	1.58	0	1.447	3.2	60.4518	1460.25	1187.1	6.30573	0.307885	0.286815	0.0210702	0.739273	0.0919981	0.00841863		0.790669	0.125136	0.00426345		0.0513963	0.0331383	0.00415518
CI	r01f-2-n	51.143	1.228	3.816	5.646	0.132	15.59	22.012	0.44	0	0.329	100.336	83.1143	4.0159	P_MT-68A	39.27	3.578	11.6	11.6345	0.23	8.48	12.46	4.59	1.58	0	1.447	3.2	60.4518	1457.5	1184.35	6.30098	0.310545	0.286903	0.0236415	0.745384	0.0902617	0.00823824		0.794559	0.116251	0.0123223		0.049175	0.0259892	0.0040841
EI	r165apx7-2-13--	49.424	1.031	4.848	5.353	0.075	15.631	22.168	0.383	0	0.469	99.382	83.8846	4.03567	P_MT-68A	39.27	3.578	11.6	11.6345	0.23	8.48	12.46	4.59	1.58	0	1.447	3.2	60.4518	1452.63	1179.48	5.58105	0.293657	0.284981	0.00867559	0.751366	0.0961353	0.00863098		0.783237	0.124423	0.0209805		0.0318714	0.028288	0.0123495
EI	r29a-3-n	50.309	1.336	4.52	5.408	0.082	15.458	22.537	0.459	0	0.372	100.481	83.5939	4.02755	P_MT-68A	39.27	3.578	11.6	11.6345	0.23	8.48	12.46	4.59	1.58	0	1.447	3.2	60.4518	1456.27	1183.12	6.49943	0.299994	0.28753	0.0124638	0.748821	0.087447	0.00800357		0.800364	0.106288	0.0116394		0.0515427	0.0188407	0.00363582
EI	r30Px-7-2-30--	49.85	1.47	4.92	5.54	0.07	15.63	22.28	0.49	0	0.42	100.67	83.4141	4.03438	P_MT-68A	39.27	3.578	11.6	11.6345	0.23	8.48	12.46	4.59	1.58	0	1.447	3.2	60.4518	1467.76	1194.61	7.10663	0.303935	0.288826	0.0151088	0.728681	0.0939936	0.00887637		0.781231	0.122094	0.00793262		0.0525494	0.0281004	0.000943748
NI	r97-1-n	51.796	1.13	3.283	5.271	0.079	15.596	22.653	0.358	0	0.252	100.418	84.0622	4.00902	P_MT-68A	39.27	3.578	11.6	11.6345	0.23	8.48	12.46	4.59	1.58	0	1.447	3.2	60.4518	1432.62	1159.47	4.67058	0.289807	0.283159	0.00664874	0.788606	0.0802065	0.00679054		0.827581	0.0929576	0.0143539		0.0389744	0.0127512	0.00756336
NI	r97-3-n	50.574	1.278	3.75	5.325	0.11	15.538	23.519	0.374	0	0.153	100.621	83.8749	4.03462	P_MT-68A	39.27	3.578	11.6	11.6345	0.23	8.48	12.46	4.59	1.58	0	1.447	3.2	60.4518	1417.38	1144.23	3.66698	0.293869	0.28086	0.0130093	0.81529	0.0720839	0.00579132		0.854427	0.0805915	0		0.0391363	0.00850762	0.00579132
SSA	r180px3-7--	50.099	1.148	3.849	5.275	0.065	15.875	22.101	0.49	0	0.555	99.457	84.2883	4.03402	P_MT-68A	39.27	3.578	11.6	11.6345	0.23	8.48	12.46	4.59	1.58	0	1.447	3.2	60.4518	1450.24	1177.09	5.46486	0.28493	0.284779	0.000151333	0.755857	0.08975	0.00794308		0.800287	0.120851	0		0.0444292	0.0311008	0.00794308
EI	r165-Cpx2_1-Nc	49.424	1.031	4.848	5.353	0.075	15.631	22.168	0.383	0	0.469	99.382	83.8846	4.03567	P_MT-68A	39.27	3.578	11.6	11.6345	0.23	8.48	12.46	4.59	1.58	0	1.447	3.2	60.4518	1452.63	1179.48	5.58105	0.293657	0.284981	0.00867559	0.751366	0.0961353	0.00863098		0.783237	0.124423	0.0209805		0.0318714	0.028288	0.0123495
EI	r165-Cpx3_1-Nc	49.929	1.508	4.876	5.642	0.072	15.615	22.472	0.425	0	0.293	100.832	83.1467	4.03324	P_MT-68A	39.27	3.578	11.6	11.6345	0.23	8.48	12.46	4.59	1.58	0	1.447	3.2	60.4518	1456.51	1183.36	6.11485	0.309828	0.286387	0.0234415	0.746423	0.0930149	0.00847076		0.788328	0.119091	0.0111668		0.0419045	0.0260762	0.00269605
SSA	r180px2-6--	49.645	1.425	4.181	5.357	0.128	15.597	22.001	0.379	0	0.396	99.109	83.8451	4.02689	P_MT-68A	39.27	3.578	11.6	11.6345	0.23	8.48	12.46	4.59	1.58	0	1.447	3.2	60.4518	1449.66	1176.51	5.44463	0.294517	0.284722	0.00979522	0.75715	0.0920286	0.00817006		0.794168	0.11941	0.005442		0.0370179	0.0273812	0.00272806
SSA	r27-2-n	50.613	1.443	3.704	5.423	0.08	15.364	22.619	0.456	0	0.392	100.094	83.4719	4.02229	P_MT-68A	39.27	3.578	11.6	11.6345	0.23	8.48	12.46	4.59	1.58	0	1.447	3.2	60.4518	1441.83	1168.68	5.49714	0.302667	0.285203	0.0174637	0.772957	0.0808086	0.0070565		0.822455	0.0950506	0		0.0494979	0.0142419	0.0070565
WI	r125-3-n l	50.912	1.108	3.183	5.299	0.129	16.119	21.511	0.447	0	0.398	99.106	84.4297	4.01987	P_MT-68A	39.27	3.578	11.6	11.6345	0.23	8.48	12.46	4.59	1.58	0	1.447	3.2	60.4518	1457.33	1184.18	5.8685	0.281894	0.285679	0.00378553	0.742252	0.091493	0.00823497		0.794588	0.130932	0		0.0523361	0.0394388	0.00823497
WI	r58b-4-n	50.607	1.318	3.465	5.219	0.126	15.69	22.791	0.342	0	0.248	99.806	84.2744	4.02476	P_MT-68A	39.27	3.578	11.6	11.6345	0.23	8.48	12.46	4.59	1.58	0	1.447	3.2	60.4518	1426.07	1152.92	3.93141	0.285229	0.281295	0.00393445	0.799883	0.0787296	0.00646875		0.835368	0.095566	0		0.035485	0.0168365	0.00646875
WI	r125-1-n	50.304	1.15	3.391	5.698	0.111	15.732	21.894	0.439	0	0.409	99.128	83.1129	4.02861	P_MT-68A	39.27	3.578	11.6	11.6345	0.23	8.48	12.46	4.59	1.58	0	1.447	3.2	60.4518	1440.01	1166.86	4.40663	0.310576	0.282131	0.0284456	0.771972	0.0897638	0.00764662		0.805388	0.123059	0		0.0334162	0.0332957	0.00764662

## Sheet: SF2. CpxDike-Liq 
Spreadsheet modified from Neave et al. 2019
																													Estimation of intensive parameters (P-T)			Test KD(Fe-Mg)^(Cpx-Liq) equilibrium			Test DiHd and CaTs equilibrium
Metadate		Clinopyroxene Compositions in Weight Percent													Liquid Compositons in Weight Percent														Eq 33 Putirka (2008)		Nerve & Putirka (2017)	Eq Rhodes et al. (1979)	Eq 35 Putirka (2008)		Predicted Cpx Components (Putirka, 1999; Mollo et al., 2013)				Observed Cpx components (Putirka et al., 1996)
Sample	Analysis /Location	SiO2	TiO2	Al2O3	FeOt	MnO	MgO	CaO	Na2O	K2O	Cr2O3	Total	100*Mg#Cpx	Cations Sum (6O)	Sample	SiO2	TiO2	Al2O3	FeOt	MnO	MgO	CaO	Na2O	K2O	Cr2O3	P2O5	H2O	100*Mg#Liq	T°C	T(K)	P (kbar)	KD (Fe-Mg)	KD (Fe-Mg)	ΔKd (<0.03)	DiHd	EnFs	CaTs		DiHd	EnFs	CaTs		ΔDiHd (SEE 0.06)	ΔEnFs (SEE 0.05)	ΔCaTs (SEE 0.03)
MT-73C	10mc-N-A3	49.04	2	5.44	5.15	0.096	14.88	22.95	0.4944	0.01	0.3707	100.431	83.7411	4.03144	P_MT-68A	39.27	3.578	11.6	11.6345	0.23	8.48	12.46	4.59	1.58	0	1.447	3.2	67.6511	1180.54	1453.69	6.90904	0.296779	0.289205	0.288803	0.753977	0.0859989	0.00797498		0.800417	0.0879508	0.00843779		0.0464392	0.00195198	0.000462807

## Sheet: SF3. Rhodes Diag Calc
The Rhodes Diagram - Test for Fe-Mg echange, Cpx-liq Equilibrium							KD(Fe-Mg)= (XFe/XMg)Cpx*(XMgO/XFeO)Liq																	(XMgO/XFeO)Liq = KD(Fe-Mg)*(XMg/XFe)Cpx
																								Mg#Liq=(XMgO/XFeO)/(XMgO/XFeO +1)
*Select Value for KD(Fe-Mg)cpx-liq																								Mg#Cpx=(XMg/XFe)/(XMg/XFe +1)
0.27					Mollo et al. (2013) 0.27±0.03
Select Value for error bounds					Equilibrium minus 1 sigma					Equilibrium max 1 sigma
0.03					0.24					0.3								Rhodes et al. (1979)
															#	100*Mg#Liq	100*Mg#Cpx	KD(Fe-Mg)
(XMg/XFe)Cpx	(XMgO/XFeO)Liq	100*Mg#Liq	100*Mg#Cpx		(XMg/XFe)Cpx	(XMgO/XFeO)Liq	100*Mg#Liq	100*Mg#Cpx		(XMg/XFe)Cpx	(XMgO/XFeO)Liq	100*Mg#Liq	100*Mg#Cpx		1	67.6511	88.4122	0.274097
0	0	0	0		0	0	0	0		0	0	0	0		2	67.6511	87.5599	0.297122
0.1	0.027	2.62902	9.09091		0.1	0.024	2.34375	9.09091		0.1	0.03	2.91262	9.09091		3	67.6511	89.1503	0.254512
0.2	0.054	5.12334	16.6667		0.2	0.048	4.58015	16.6667		0.2	0.06	5.66038	16.6667		4	67.6511	89.1401	0.254781
0.3	0.081	7.49306	23.0769		0.3	0.072	6.71642	23.0769		0.3	0.09	8.25688	23.0769		5	67.6511	87.3964	0.30159
0.4	0.108	9.74729	28.5714		0.4	0.096	8.75912	28.5714		0.4	0.12	10.7143	28.5714		6	67.6511	86.9793	0.313064
0.5	0.135	11.8943	33.3333		0.5	0.12	10.7143	33.3333		0.5	0.15	13.0435	33.3333		7	67.6511	88.4034	0.274331
0.6	0.162	13.9415	37.5		0.6	0.144	12.5874	37.5		0.6	0.18	15.2542	37.5		8	62.057	84.8769	0.291415
0.7	0.189	15.8957	41.1765		0.7	0.168	14.3836	41.1765		0.7	0.21	17.3554	41.1765		9	60.4518	84.9624	0.270541
0.8	0.216	17.7632	44.4444		0.8	0.192	16.1074	44.4444		0.8	0.24	19.3548	44.4444		10	60.4518	84.6637	0.276889
0.9	0.243	19.5495	47.3684		0.9	0.216	17.7632	47.3684		0.9	0.27	21.2598	47.3684		11	60.4518	84.8031	0.27392
1	0.27	21.2598	50		1	0.24	19.3548	50		1	0.3	23.0769	50		12	60.4518	83.9004	0.293314
1.1	0.297	22.899	52.381		1.1	0.264	20.8861	52.381		1.1	0.33	24.812	52.381		13	60.4518	83.6106	0.299628
1.2	0.324	24.4713	54.5455		1.2	0.288	22.3602	54.5455		1.2	0.36	26.4706	54.5455		14	60.4518	83.2347	0.307885
1.3	0.351	25.9808	56.5217		1.3	0.312	23.7805	56.5217		1.3	0.39	28.0576	56.5217		15	60.4518	83.1143	0.310545
1.4	0.378	27.4311	58.3333		1.4	0.336	25.1497	58.3333		1.4	0.42	29.5775	58.3333		16	60.4518	83.8846	0.293657
1.5	0.405	28.8256	60		1.5	0.36	26.4706	60		1.5	0.45	31.0345	60		17	60.4518	83.5939	0.299994
1.6	0.432	30.1676	61.5385		1.6	0.384	27.7457	61.5385		1.6	0.48	32.4324	61.5385		18	60.4518	83.4141	0.303935
1.7	0.459	31.4599	62.963		1.7	0.408	28.9773	62.963		1.7	0.51	33.7748	62.963		19	60.4518	84.0622	0.289807
1.8	0.486	32.7052	64.2857		1.8	0.432	30.1676	64.2857		1.8	0.54	35.0649	64.2857		20	60.4518	83.8749	0.293869
1.9	0.513	33.9061	65.5172		1.9	0.456	31.3187	65.5172		1.9	0.57	36.3057	65.5172		21	60.4518	84.2883	0.28493
2	0.54	35.0649	66.6667		2	0.48	32.4324	66.6667		2	0.6	37.5	66.6667		22	60.4518	83.8846	0.293657
2.1	0.567	36.1838	67.7419		2.1	0.504	33.5106	67.7419		2.1	0.63	38.6503	67.7419		23	60.4518	83.1467	0.309828
2.2	0.594	37.2647	68.75		2.2	0.528	34.555	68.75		2.2	0.66	39.759	68.75		24	60.4518	83.8451	0.294517
2.3	0.621	38.3097	69.697		2.3	0.552	35.567	69.697		2.3	0.69	40.8284	69.697		25	60.4518	83.4719	0.302667
2.4	0.648	39.3204	70.5882		2.4	0.576	36.5482	70.5882		2.4	0.72	41.8605	70.5882		26	60.4518	84.4297	0.281894
2.5	0.675	40.2985	71.4286		2.5	0.6	37.5	71.4286		2.5	0.75	42.8571	71.4286		27	60.4518	84.2744	0.285229
2.6	0.702	41.2456	72.2222		2.6	0.624	38.4236	72.2222		2.6	0.78	43.8202	72.2222		28	60.4518	83.1129	0.310576
2.7	0.729	42.1631	72.973		2.7	0.648	39.3204	72.973		2.7	0.81	44.7514	72.973
2.8	0.756	43.0524	73.6842		2.8	0.672	40.1914	73.6842		2.8	0.84	45.6522	73.6842
2.9	0.783	43.9148	74.359		2.9	0.696	41.0377	74.359		2.9	0.87	46.5241	74.359
3	0.81	44.7514	75		3	0.72	41.8605	75		3	0.9	47.3684	75
3.1	0.837	45.5634	75.6098		3.1	0.744	42.6606	75.6098		3.1	0.93	48.1865	75.6098
3.2	0.864	46.3519	76.1905		3.2	0.768	43.4389	76.1905		3.2	0.96	48.9796	76.1905
3.3	0.891	47.1179	76.7442		3.3	0.792	44.1964	76.7442		3.3	0.99	49.7487	76.7442
3.4	0.918	47.8624	77.2727		3.4	0.816	44.9339	77.2727		3.4	1.02	50.495	77.2727
3.5	0.945	48.5861	77.7778		3.5	0.84	45.6522	77.7778		3.5	1.05	51.2195	77.7778
3.6	0.972	49.2901	78.2609		3.6	0.864	46.3519	78.2609		3.6	1.08	51.9231	78.2609
3.7	0.999	49.975	78.7234		3.7	0.888	47.0339	78.7234		3.7	1.11	52.6066	78.7234
3.8	1.026	50.6417	79.1667		3.8	0.912	47.6987	79.1667		3.8	1.14	53.271	79.1667
3.9	1.053	51.2908	79.5918		3.9	0.936	48.3471	79.5918		3.9	1.17	53.9171	79.5918
4	1.08	51.9231	80		4	0.96	48.9796	80		4	1.2	54.5455	80
4.1	1.107	52.5392	80.3922		4.1	0.984	49.5968	80.3922		4.1	1.23	55.157	80.3922
4.2	1.134	53.1396	80.7692		4.2	1.008	50.1992	80.7692		4.2	1.26	55.7522	80.7692
4.3	1.161	53.7251	81.1321		4.3	1.032	50.7874	81.1321		4.3	1.29	56.3319	81.1321
4.4	1.188	54.2962	81.4815		4.4	1.056	51.3619	81.4815		4.4	1.32	56.8966	81.4815
4.5	1.215	54.8533	81.8182		4.5	1.08	51.9231	81.8182		4.5	1.35	57.4468	81.8182
4.6	1.242	55.397	82.1429		4.6	1.104	52.4715	82.1429		4.6	1.38	57.9832	82.1429
4.7	1.269	55.9277	82.4561		4.7	1.128	53.0075	82.4561		4.7	1.41	58.5062	82.4561
4.8	1.296	56.446	82.7586		4.8	1.152	53.5316	82.7586		4.8	1.44	59.0164	82.7586
4.9	1.323	56.9522	83.0508		4.9	1.176	54.0441	83.0508		4.9	1.47	59.5142	83.0508
5	1.35	57.4468	83.3333		5	1.2	54.5455	83.3333		5	1.5	60	83.3333
5.1	1.377	57.9302	83.6066		5.1	1.224	55.036	83.6066		5.1	1.53	60.4743	83.6066
5.2	1.404	58.4027	83.871		5.2	1.248	55.516	83.871		5.2	1.56	60.9375	83.871
5.3	1.431	58.8647	84.127		5.3	1.272	55.9859	84.127		5.3	1.59	61.39	84.127
5.4	1.458	59.3165	84.375		5.4	1.296	56.446	84.375		5.4	1.62	61.8321	84.375
5.5	1.485	59.7586	84.6154		5.5	1.32	56.8966	84.6154		5.5	1.65	62.2642	84.6154
5.6	1.512	60.1911	84.8485		5.6	1.344	57.3379	84.8485		5.6	1.68	62.6866	84.8485
5.7	1.539	60.6144	85.0746		5.7	1.368	57.7703	85.0746		5.7	1.71	63.0996	85.0746
5.8	1.566	61.0288	85.2941		5.8	1.392	58.194	85.2941		5.8	1.74	63.5036	85.2941
5.9	1.593	61.4346	85.5072		5.9	1.416	58.6093	85.5072		5.9	1.77	63.8989	85.5072
6	1.62	61.8321	85.7143		6	1.44	59.0164	85.7143		6	1.8	64.2857	85.7143
6.1	1.647	62.2214	85.9155		6.1	1.464	59.4156	85.9155		6.1	1.83	64.6643	85.9155
6.2	1.674	62.6028	86.1111		6.2	1.488	59.8071	86.1111		6.2	1.86	65.035	86.1111
6.3	1.701	62.9767	86.3014		6.3	1.512	60.1911	86.3014		6.3	1.89	65.3979	86.3014
6.4	1.728	63.3431	86.4865		6.4	1.536	60.5678	86.4865		6.4	1.92	65.7534	86.4865
6.5	1.755	63.7024	86.6667		6.5	1.56	60.9375	86.6667		6.5	1.95	66.1017	86.6667
6.6	1.782	64.0546	86.8421		6.6	1.584	61.3003	86.8421		6.6	1.98	66.443	86.8421
6.7	1.809	64.4001	87.013		6.7	1.608	61.6564	87.013		6.7	2.01	66.7774	87.013
6.8	1.836	64.7391	87.1795		6.8	1.632	62.0061	87.1795		6.8	2.04	67.1053	87.1795
6.9	1.863	65.0716	87.3418		6.9	1.656	62.3494	87.3418		6.9	2.07	67.4267	87.3418
7	1.89	65.3979	87.5		7	1.68	62.6866	87.5		7	2.1	67.7419	87.5
7.1	1.917	65.7182	87.6543		7.1	1.704	63.0178	87.6543		7.1	2.13	68.0511	87.6543
7.2	1.944	66.0326	87.8049		7.2	1.728	63.3431	87.8049		7.2	2.16	68.3544	87.8049
7.3	1.971	66.3413	87.9518		7.3	1.752	63.6628	87.9518		7.3	2.19	68.652	87.9518
7.4	1.998	66.6444	88.0952		7.4	1.776	63.9769	88.0952		7.4	2.22	68.9441	88.0952
7.5	2.025	66.9421	88.2353		7.5	1.8	64.2857	88.2353		7.5	2.25	69.2308	88.2353
7.6	2.052	67.2346	88.3721		7.6	1.824	64.5892	88.3721		7.6	2.28	69.5122	88.3721
7.7	2.079	67.5219	88.5057		7.7	1.848	64.8876	88.5057		7.7	2.31	69.7885	88.5057
7.8	2.106	67.8042	88.6364		7.8	1.872	65.1811	88.6364		7.8	2.34	70.0599	88.6364
7.9	2.133	68.0817	88.764		7.9	1.896	65.4696	88.764		7.9	2.37	70.3264	88.764
8	2.16	68.3544	88.8889		8	1.92	65.7534	88.8889		8	2.4	70.5882	88.8889
8.1	2.187	68.6225	89.011		8.1	1.944	66.0326	89.011		8.1	2.43	70.8455	89.011
8.2	2.214	68.8861	89.1304		8.2	1.968	66.3073	89.1304		8.2	2.46	71.0983	89.1304
8.3	2.241	69.1453	89.2473		8.3	1.992	66.5775	89.2473		8.3	2.49	71.3467	89.2473
8.4	2.268	69.4002	89.3617		8.4	2.016	66.8435	89.3617		8.4	2.52	71.5909	89.3617
8.5	2.295	69.651	89.4737		8.5	2.04	67.1053	89.4737		8.5	2.55	71.831	89.4737
8.6	2.322	69.8977	89.5833		8.6	2.064	67.3629	89.5833		8.6	2.58	72.067	89.5833
8.7	2.349	70.1403	89.6907		8.7	2.088	67.6166	89.6907		8.7	2.61	72.2992	89.6907
8.8	2.376	70.3791	89.7959		8.8	2.112	67.8663	89.7959		8.8	2.64	72.5275	89.7959
8.9	2.403	70.6142	89.899		8.9	2.136	68.1122	89.899		8.9	2.67	72.752	89.899
9	2.43	70.8455	90		9	2.16	68.3544	90		9	2.7	72.973	90
9.1	2.457	71.0732	90.099		9.1	2.184	68.593	90.099		9.1	2.73	73.1903	90.099
9.2	2.484	71.2974	90.1961		9.2	2.208	68.8279	90.1961		9.2	2.76	73.4043	90.1961
9.3	2.511	71.5181	90.2913		9.3	2.232	69.0594	90.2913		9.3	2.79	73.6148	90.2913
9.4	2.538	71.7354	90.3846		9.4	2.256	69.2875	90.3846		9.4	2.82	73.822	90.3846
9.5	2.565	71.9495	90.4762		9.5	2.28	69.5122	90.4762		9.5	2.85	74.026	90.4762
9.6	2.592	72.1604	90.566		9.6	2.304	69.7337	90.566		9.6	2.88	74.2268	90.566
9.7	2.619	72.3681	90.6542		9.7	2.328	69.9519	90.6542		9.7	2.91	74.4246	90.6542
9.8	2.646	72.5727	90.7407		9.8	2.352	70.1671	90.7407		9.8	2.94	74.6193	90.7407
9.9	2.673	72.7743	90.8257		9.9	2.376	70.3791	90.8257		9.9	2.97	74.8111	90.8257
10	2.7	72.973	90.9091		10	2.4	70.5882	90.9091		10	3	75	90.9091
20	5.4	84.375	95.2381		20	4.8	82.7586	95.2381		20	6	85.7143	95.2381
30	8.1	89.011	96.7742		30	7.2	87.8049	96.7742		30	9	90	96.7742
40	10.8	91.5254	97.561		40	9.6	90.566	97.561		40	12	92.3077	97.561
50	13.5	93.1034	98.0392		50	12	92.3077	98.0392		50	15	93.75	98.0392
60	16.2	94.186	98.3607		60	14.4	93.5065	98.3607		60	18	94.7368	98.3607
70	18.9	94.9749	98.5915		70	16.8	94.382	98.5915		70	21	95.4545	98.5915
80	21.6	95.5752	98.7654		80	19.2	95.0495	98.7654		80	24	96	98.7654
90	24.3	96.0474	98.9011		90	21.6	95.5752	98.9011		90	27	96.4286	98.9011
100	27	96.4286	99.0099		100	24	96	99.0099		100	30	96.7742	99.0099
200	54	98.1818	99.5025		200	48	97.9592	99.5025		200	60	98.3607	99.5025
300	81	98.7805	99.6678		300	72	98.6301	99.6678		300	90	98.9011	99.6678
400	108	99.0826	99.7506		400	96	98.9691	99.7506		400	120	99.1736	99.7506
500	135	99.2647	99.8004		500	120	99.1736	99.8004		500	150	99.3377	99.8004
600	162	99.3865	99.8336		600	144	99.3103	99.8336		600	180	99.4475	99.8336
700	189	99.4737	99.8573		700	168	99.4083	99.8573		700	210	99.5261	99.8573
800	216	99.5392	99.8752		800	192	99.4819	99.8752		800	240	99.5851	99.8752
900	243	99.5902	99.889		900	216	99.5392	99.889		900	270	99.631	99.889
1000	270	99.631	99.9001		1000	240	99.5851	99.9001		1000	300	99.6678	99.9001

## Sheet: SF4. DiHd, EnFs and CaTs Eql
Select % threshold							Cpx dates
0.06
One-to-one line		Lower Threshold (20%)		Upper Threshold (20%)			DiHd Pred	DiHd Obs		EnFs Pred	EnFs Obs		CaTs Pred	CaTs Obs
0	0	0.06	0	0	0.06		0.82369	0.824535		0.124509	0.0993607		0.00704143	0
0.1	0.1	0.16	0.1	0.1	0.16		0.789806	0.834566		0.112707	0.0842962		0.00688425	0.0130684
0.2	0.2	0.26	0.2	0.2	0.26		0.835266	0.798758		0.147183	0.133934		0.00789017	0
0.3	0.3	0.36	0.3	0.3	0.36		0.834044	0.798821		0.146946	0.13395		0.00789475	0
0.4	0.4	0.46	0.4	0.4	0.46		0.782338	0.838956		0.110553	0.0905659		0.00677691	0.000109346
0.5	0.5	0.56	0.5	0.5	0.56		0.76441	0.807951		0.127328	0.113137		0.00800484	0.00424223
0.6	0.6	0.66	0.6	0.6	0.66		0.821502	0.832812		0.121632	0.111968		0.00675385	0
0.7	0.7	0.76	0.7	0.7	0.76		0.753103	0.810513		0.105016	0.112861		0.00853895	0
0.8	0.8	0.86	0.8	0.8	0.86		0.799177	0.835165		0.0776874	0.0849671		0.00648005	0.00871153
0.9	0.9	0.96	0.9	0.9	0.96		0.780025	0.807541		0.0827286	0.0598589		0.0075215	0.0216961
1	1	1.06	1	1	1.06		0.727466	0.769507		0.100133	0.13744		0.00934158	0.00239425
							0.757663	0.805685		0.0865742	0.107708		0.00774502	0
							0.7864	0.822617		0.0828689	0.103999		0.00696742	0
							0.739273	0.790669		0.0919981	0.125136		0.00841863	0.00426345
							0.745384	0.794559		0.0902617	0.116251		0.00823824	0.0123223
							0.751366	0.783237		0.0961353	0.124423		0.00863098	0.0209805
							0.748821	0.800364		0.087447	0.106288		0.00800357	0.0116394
							0.728681	0.781231		0.0939936	0.122094		0.00887637	0.00793262
							0.788606	0.827581		0.0802065	0.0929576		0.00679054	0.0143539
							0.81529	0.854427		0.0720839	0.0805915		0.00579132	0
							0.755857	0.800287		0.08975	0.120851		0.00794308	0
							0.751366	0.783237		0.0961353	0.124423		0.00863098	0.0209805
							0.746423	0.788328		0.0930149	0.119091		0.00847076	0.0111668
							0.75715	0.794168		0.0920286	0.11941		0.00817006	0.005442
							0.772957	0.822455		0.0808086	0.0950506		0.0070565	0
							0.742252	0.794588		0.091493	0.130932		0.00823497	0
							0.799883	0.835368		0.0787296	0.095566		0.00646875	0
							0.771972	0.805388		0.0897638	0.123059		0.00764662	0
