# Supplementary material
Source: MDPI journal article supplement (https://www.mdpi.com/2075-163X/12/6/775)
Supplement: s1 [file s1 › Supplem Mat G - pl_ap_comp.xlsx]

## Sheet: Labels
Supplementary Material F - Trace-element composition of plagioclase and apatite from Ponte Nova Massif
Procedures
Table SG1. Trace-element composition of NIST SRM 612 for calibration (primary) standard used in routines of trace-element analyses of plagioclase crystals from PN. Recommended values are from Jochum et al. (2011).
Table SG2. Analyses of NIST SRM 610 for calibration (primary) standard used in routines of trace-element analyses of PN apatite. Recommended values are from Jochum et al. (2011).
Table SG3. Analysis results of BHVO-2G for quality control of routine of trace-element analyses in plagioclase and apatite from PN. Recommended values are from GeoReM, preferred values: 1/2009, Jochum (Max-Planck – Institut fuer Chemie).
Table SG4. Chemical composition of plagioclase crystals from PN.
Table SG5. Chemical composition of apatite crystals from PN.

## Sheet: SG1. Calibr. STD_pl
Calibration Standards
All values reported in ppm
Trace Element Concentrations (MDL filtered)
Sample	Nist-612- Ref. Values		31	31	31	31	31	31	33	33	33	33	33
Element	Concent.	(2-sigma)	Nist-612a	Nist-612b	Nist-612c	Nist-612d	Nist-612e	Nist-612f	Nist-612a	Nist-612b	Nist-612c	Nist-612d	Nist-612e
Li7	40.2	1.3	41.78	42.01	40.45	41.65	41.5	42.33	41.91	40.67	42.66	41.04	41.84
K39	62.3	2.4	65.94	67.87	63.37	67.82	67.53	64.48	66.99	65.11	67.08	65.94	91.5
Sc45	39.9	2.5	41.19	40.43	41.65	41.17	41.76	38.97	41.09	40.47	42.27	40.48	43.05
Ti49	44	2.3	49.39	46.48	48.49	48.2	49.1	45.73	48.64	46.96	49.5	47.5	50.72
V51	38.8	1.2	39.87	38.56	39.06	39.42	39.63	38.23	39.14	38.37	41.41	38.23	40.44
Mn55	38.7	0.9	38.4	38.47	38.52	38.1	39.7	36.18	37.87	38.19	40.36	37.51	41.05
Fe57	51	2	57.24	56.53	54.26	57.11	58.38	52.94	54.97	56.39	59.54	54.81	55.16
Zn66	39.1	1.7	38.04	37.16	38.79	38.02	38.45	36.07	38.23	36.97	39.39	37.27	37.5
Ga71	36.9	1.5	36.29	36.05	36.56	35.98	36.9	34.94	36.61	35.42	37.23	35.81	38.2
Rb85	31.4	0.4	31.62	31.28	32.47	31.12	31.51	32.06	32.32	31	31.48	31.76	32.97
Sr88	78.4	0.2	76.25	74.97	77.89	75.76	77.83	71.97	76.55	75.13	77.51	75.54	79.45
Y89	38.3	1.4	38.4	37.3	39.29	38.53	38.7	36.23	38.36	37.84	38.91	37.94	40.42
Zr90	37.9	1.2	35.97	35.35	36.69	36.52	36.13	34.5	35.98	35.66	36.75	35.63	37.79
Nb93	38.9	2.1	38.27	37.36	38.43	38.69	38.32	36.44	37.86	37.86	38.98	37.61	38.99
Cs133	42.7	1.8	42.39	40.49	42.13	41.76	41.81	40.83	41.79	41.24	42.18	41.4	42.75
Ba137	39.3	0.9	38.51	36.21	38.29	38.89	37.4	36.67	38.26	37.1	37.97	37.67	37.8
La139	36	0.7	35.96	35.35	35.74	36.41	36.03	34.38	36.05	35.39	35.98	35.69	36.91
Ce140	38.4	0.7	38.89	37.58	38.13	39.33	38.66	36.61	38.92	37.53	38.89	38.14	39.53
Pr141	37.9	1	37.5	36.42	36.99	38.51	37.9	34.13	37.6	36.51	37.6	36.99	37.83
Nd143	35.5	0.7	35.3	34.77	34.99	36.78	36.06	31.87	35.65	34.43	36.11	34.86	36.87
Sm147	37.7	0.8	37.4	35.23	37	38.46	37.24	33.42	37.18	36.14	36.94	36.65	37.4
Eu151	35.6	0.8	34.9	33.45	34.64	35.43	35.26	31.45	34.71	34.11	34.55	34.41	35.38
Gd157	37.3	0.9	37.26	35.88	37.53	37.93	37.41	34.36	37.61	36.25	36.99	36.99	37.84
Tb159	37.6	1.1	36.15	35.06	36.33	36.75	37.06	32.4	36.7	35.31	35.5	36.2	35.94
Dy161	35.5	0.7	36.25	35.37	36.02	36.51	37.85	31.69	36.52	35.47	35.83	36.08	37.02
Ho165	38.3	0.8	37.91	37.3	38.02	38.92	39.06	34.14	37.98	37.71	37.96	37.84	39.09
Er166	38	0.9	37.36	37.03	37.53	38.43	38.51	33.93	37.57	37.19	37.63	37.34	40.01
Tm169	36.8	0.6	37.58	36.91	37.94	38.44	38.48	34.31	38.02	36.91	37.88	37.43	39.37
Yb173	39.2	0.9	39.72	39.79	40.02	40.81	41.12	36.42	40.52	39.52	39.6	40.17	40.65
Lu175	37	0.9	37.34	37.48	38	38.83	38.53	34.43	37.6	37.52	38.38	37.38	38.35
Hf179	36.7	1.2	34.47	34.62	35.01	35.57	35.31	32.4	34.59	34.58	35.64	34.34	34.99
Ta181	37.6	1.9	39.27	39.64	40.15	40.83	40.38	36.85	39.7	39.34	40.89	39.24	40.56
Pb208	38.57	0.2	38.47	39.49	39	38.8	40.03	36.84	39.33	38.24	39.7	38.64	38.85
Th232	37.79	0.08	37.15	36.9	37.45	37.91	37.89	34.81	37.35	36.95	37.58	37.07	38.17
U238	37.38	0.08	37.59	37.11	36.59	37.04	37.12	37.85	37.87	36.22	37.6	37	36.32
GLITTER!: 1 sigma error.
Element			Nist-612a	Nist-612b	Nist-612c	Nist-612d	Nist-612e	Nist-612f	Nist-612a	Nist-612b	Nist-612c	Nist-612d	Nist-612e
Li7			1.52	1.54	1.56	1.8	2.13	2.23	1.68	1.64	2	2.47	2.62
K39			3.48	3.57	3.64	4.61	5.71	5.62	2.38	2.32	2.61	3.03	4.31
Sc45			1.68	1.65	1.83	2.11	2.64	2.54	1.6	1.58	1.92	2.36	2.61
Ti49			2.5	2.37	2.7	3.2	4.09	4.03	2.18	2.12	2.61	3.24	3.62
V51			1.45	1.4	1.5	1.69	2	1.98	2.09	2.06	2.82	3.62	4.03
Mn55			1.71	1.71	1.87	2.19	2.86	2.68	1.86	1.89	2.5	3.21	3.7
Fe57			3.4	3.35	3.55	4.45	5.72	5.54	3.29	3.37	4.33	5.32	5.63
Zn66			1.69	1.66	1.85	2.1	2.57	2.54	1.85	1.8	2.3	2.88	3.04
Ga71			1.34	1.33	1.42	1.55	1.86	1.82	1.49	1.45	1.8	2.26	2.52
Rb85			1.19	1.18	1.28	1.38	1.63	1.7	1.2	1.16	1.34	1.7	1.84
Sr88			3.4	3.35	3.77	4.3	5.44	5.17	2.64	2.6	2.96	3.46	3.77
Y89			1.75	1.7	1.94	2.25	2.79	2.69	1.3	1.29	1.44	1.66	1.82
Zr90			1.45	1.42	1.58	1.79	2.13	2.1	1.26	1.25	1.43	1.67	1.83
Nb93			1.51	1.48	1.62	1.87	2.22	2.17	1.35	1.36	1.56	1.84	1.97
Cs133			1.65	1.58	1.74	1.95	2.32	2.32	1.36	1.34	1.46	1.62	1.72
Ba137			1.93	1.82	2.1	2.53	3.02	3.07	1.36	1.32	1.47	1.72	1.78
La139			1.35	1.33	1.41	1.62	1.88	1.84	1.15	1.13	1.2	1.32	1.39
Ce140			1.67	1.61	1.76	2.12	2.55	2.47	1.44	1.39	1.64	2.04	2.2
Pr141			2.07	2.01	2.26	2.86	3.57	3.31	1.31	1.27	1.46	1.74	1.84
Nd143			2.16	2.13	2.39	3.07	3.85	3.52	1.44	1.4	1.72	2.16	2.39
Sm147			2.46	2.33	2.72	3.47	4.28	3.96	1.28	1.24	1.38	1.6	1.69
Eu151			2.03	1.95	2.24	2.77	3.48	3.2	1.1	1.08	1.14	1.23	1.29
Gd157			1.94	1.87	2.15	2.59	3.2	3.03	1.35	1.31	1.5	1.84	1.95
Tb159			2.19	2.13	2.47	3.06	3.93	3.54	1.36	1.32	1.52	1.97	2.04
Dy161			2.57	2.51	2.88	3.61	4.81	4.16	1.25	1.22	1.34	1.58	1.67
Ho165			2.28	2.25	2.55	3.17	4.04	3.63	1.16	1.15	1.17	1.19	1.23
Er166			2.15	2.13	2.39	2.97	3.76	3.42	1.17	1.16	1.2	1.25	1.36
Tm169			2.05	2.01	2.29	2.81	3.55	3.26	1.31	1.27	1.44	1.71	1.87
Yb173			2.17	2.18	2.42	2.98	3.79	3.46	1.38	1.35	1.47	1.74	1.81
Lu175			2.03	2.05	2.29	2.84	3.56	3.27	1.25	1.25	1.38	1.56	1.65
Hf179			1.63	1.64	1.8	2.15	2.63	2.5	1.29	1.29	1.49	1.77	1.87
Ta181			1.94	1.96	2.17	2.62	3.22	3.02	1.49	1.49	1.78	2.17	2.33
Pb208			1.71	1.75	1.86	2.15	2.7	2.55	1.44	1.41	1.65	1.99	2.08
Th232			1.67	1.66	1.83	2.16	2.65	2.5	1.18	1.17	1.23	1.32	1.39
U238			1.27	1.25	1.27	1.38	1.53	1.59	1.47	1.41	1.7	2.14	2.2
GLITTER!: Minimum detection limits (99% confidence).
Element			Nist-612a	Nist-612b	Nist-612c	Nist-612d	Nist-612e	Nist-612f	Nist-612a	Nist-612b	Nist-612c	Nist-612d	Nist-612e
Li7			0.0193	0.0154	0.0172	0.0187	0.024	0.0135	0.0569	0.0534	0.0559	0.0565	0.0556
K39			1.29	0.954	0.993	1.02	0.969	0.67	1.04	1.04	1.08	1.02	1.08
Sc45			0.0288	0.0207	0.0236	0.0222	0.0239	0.0173	0.0346	0.0338	0.0369	0.0329	0.035
Ti49			0.113	0.111	0.0964	0.0923	0.101	0.0796	0.221	0.204	0.272	0.312	0.247
V51			0.013	0.0108	0.0107	0.0112	0.00958	0.00764	0.0225	0.0202	0.0231	0.023	0.023
Mn55			0.0531	0.0425	0.0492	0.0499	0.0511	0.0349	0.0602	0.0595	0.0669	0.0639	0.0761
Fe57			1.99	1.51	1.56	1.52	1.56	1.12	1.62	1.59	1.66	1.49	1.79
Zn66			0.124	0.0884	0.103	0.0977	0.107	0.0677	0.359	0.304	0.334	0.318	0.333
Ga71			<0.00000	0.00326	0.00704	0.00525	0.00505	0.00411	0.0107	0.00869	0.0093	0.0121	0.00486
Rb85			0.00694	0.00724	0.00748	0.00834	0.00794	0.00617	0.0155	0.0158	0.0174	0.0177	0.0192
Sr88			0.00269	0.00324	0.00174	0.00448	0.00429	0.0026	0.00394	0.00635	0.00497	0.00639	0.00588
Y89			0.00289	0.00302	0.00531	0.00522	0.00424	0.00333	0.00582	0.00487	0.00483	0.00551	0.00463
Zr90			0.00942	0.00656	0.00707	0.0091	0.00504	0.0041	0.0102	0.0132	0.0121	0.008	0.0107
Nb93			0.00688	0.00491	0.00283	0.00597	0.00288	0.0027	0.00509	0.00692	0.00642	0.00522	0.00554
Cs133			0.0057	0.00272	0.00411	0.00383	0.00223	0.00256	0.00578	0.00596	0.00713	0.00596	0.00462
Ba137			0.0175	0.0259	0.0278	0.0266	0.0161	0.0151	0.0344	0.042	0.0445	0.0451	0.053
La139			0.00288	0.00347	0.00341	0.00408	0.00359	0.00238	0.00524	0.00523	0.00482	0.00539	0.00611
Ce140			0.0025	0.00247	0.00248	0.00311	0.0021	0.00177	0.00532	0.00457	0.00539	0.00545	0.00614
Pr141			0.00344	0.00293	0.00305	0.00251	0.00209	0.00204	0.00444	0.00453	0.00498	0.00503	0.00503
Nd143			0.0391	0.0225	0.0266	0.0323	0.0258	0.0171	0.0426	0.0501	0.037	0.0435	0.0401
Sm147			0.0167	0.0201	0.0139	0.0268	0.0176	0.013	0.0361	0.0341	0.0351	0.0402	0.0406
Eu151			0.00808	0.00459	0.00388	0.00573	0.00345	0.00303	0.00944	0.00802	0.0114	0.00994	0.011
Gd157			0.0251	0.0099	0.0162	0.0181	0.0211	0.0146	0.035	0.0356	0.0378	0.0333	0.0338
Tb159			0.00529	0.00191	0.00243	0.00387	0.00309	0.00195	0.00516	0.00526	0.00509	0.0054	0.00524
Dy161			0.0297	0.0186	0.0142	0.021	0.0108	0.0101	0.0296	0.0263	0.029	0.0343	0.0318
Ho165			<0.00000	0.00326	0.00285	0.00298	0.00265	0.0023	0.00533	0.00579	0.0061	0.0059	0.00677
Er166			0.0079	0.0087	0.0122	0.0107	0.00884	0.00649	0.0202	0.0167	0.0202	0.017	0.0177
Tm169			0.00371	0.00204	0.00295	0.00357	0.00342	0.00131	0.00597	0.00566	0.00563	0.00632	0.00636
Yb173			0.0298	0.0197	0.0162	0.0193	0.0185	0.0108	0.032	0.0348	0.0395	0.0382	0.0358
Lu175			0.00352	0.00213	0.00324	0.00304	0.00372	0.00227	0.00544	0.00741	0.00569	0.00615	0.0064
Hf179			0.0419	0.0126	0.0271	0.0266	0.0255	0.0157	0.0379	0.0484	0.0491	0.0485	0.0465
Ta181			0.00418	0.00503	0.00411	0.00459	0.00513	0.00145	0.00816	0.00632	0.00896	0.0064	0.0094
Pb208			0.00378	0.00644	0.00873	0.00355	0.00475	0.00352	0.00435	0.00532	0.0108	0.011	0.021
Th232			<0.00000	0.00137	<0.00000	<0.00000	<0.00000	<0.00000	<0.00000	0.00175	<0.00000	<0.00000	<0.00000
U238			<0.00000	<0.00000	0.00148	<0.00000	0.00147	<0.00000	0.00141	<0.00000	<0.00000	0.00146	0.0022

## Sheet: SG2. Calibr. STD_ap
Calibration Standards
All values reported in ppm
Trace Element Concentrations (MDL filtered)
Sample	Nist-610- Ref. Values		41	41	41	41
Element	Concent.	(2-sigma)	Nist-610a	Nist-610b	Nist-610c	Nist-610d
Mg24	432	29	463.81	466.34	469.44	461.75
P31	413	46	340.82	345.72	334.33	349.3
Sc45	455	10	446	436.07	439.57	443.17
Ti48	452	10	445.61	422.91	429.51	439.7
V51	450	9	446.13	437.42	438.56	445.06
Mn55	444	13	433.94	432.62	433.15	433.52
Fe57	458	9	467.03	446.98	453.11	462.03
Ga69	433	13	454.05	422.19	439.58	439.39
Ge70	447	78	431.3	420.46	429.16	424.8
As75	325	18	316.52	318.27	318.17	316.63
Rb85	425.7	1	442.13	419.55	433.14	431.2
Sr88	515.5	1	517.52	478.04	496.19	501.57
Y89	462	11	454.48	444.54	452.72	448.36
Zr90	448	9	440.83	438.26	443.75	436.99
Nb93	465	34	428.45	410.37	417.28	422.63
Ba137	452	9	437.76	410.06	424.34	426.08
La139	440	10	468.56	445.29	462.03	455.46
Ce140	453	8	450.88	443.01	457.37	440.96
Pr141	448	7	431.76	426.54	437.13	424.43
Nd145	430	8	439.39	421.34	433.4	430.07
Sm147	453	11	460.18	439.91	453.73	449.44
Eu151	447	12	463.12	458.21	465.34	458.05
Gd157	449	12	421.78	416.86	426.26	415.21
Tb159	437	9	457.08	428.26	445.21	443.1
Dy163	437	11	436.77	415.55	428.79	426.3
Ho165	449	12	448.36	449.65	455.5	444.43
Er166	455	14	425.64	425.95	428.95	423.57
Tm169	435	10	429.49	410.94	416.37	424.86
Yb173	450	9	467.5	455.22	460.43	463.37
Lu175	439	8	433.67	435.47	437.27	432.46
Hf179	435	12	419.53	415.98	415.78	419.6
Ta181	446	33	383.3	370.06	373.38	380.45
Pb208	426	1	419.51	406.37	415.68	412.36
Th232	457.2	1	457.69	442.06	457.96	445.98
U238	461.5	1	470.15	443.19	462.71	454.69
GLITTER!: 1 sigma error.
Element			Nist-610a	Nist-610b	Nist-610c	Nist-610d
Mg24			16.3	16.39	17.34	17.35
P31			111.88	113.57	110.68	115.9
Sc45			14.85	14.57	16.38	17.1
Ti48			19.38	18.61	25.44	28.13
V51			14.97	14.73	16.57	17.45
Mn55			13.32	13.28	13.34	13.37
Fe57			19.4	18.72	24.03	26.12
Ga69			22.78	21.45	31.28	33.96
Ge70			14.88	14.56	16.97	17.5
As75			18.17	18.25	18.22	18.14
Rb85			18.54	17.76	24.07	25.73
Sr88			27.71	25.94	38.3	42.15
Y89			15.09	14.81	16.91	17.37
Zr90			14.01	13.95	15.01	15.09
Nb93			16.74	16.17	20.95	22.67
Ba137			20.78	19.67	27.74	30.1
La139			19.92	19.1	25.93	27.43
Ce140			17.14	16.96	21.69	22.21
Pr141			15.13	15.01	18.09	18.43
Nd145			16.93	16.35	21.01	22.17
Sm147			18.22	17.56	23.05	24.38
Eu151			14.91	14.78	16.2	16.35
Gd157			14.49	14.37	16.87	17.13
Tb159			21.44	20.31	28.92	31.13
Dy163			17.93	17.18	22.86	24.3
Ho165			14.92	15	16.94	17.1
Er166			13.3	13.31	13.89	13.88
Tm169			17.3	16.68	21.63	23.57
Yb173			15.89	15.52	17.89	18.74
Lu175			13.49	13.55	14.05	14.05
Hf179			13.13	13.02	13.49	13.78
Ta181			14.3	13.89	17.28	18.68
Pb208			14.84	14.46	17.63	18.42
Th232			17.72	17.25	22.58	23.45
U238			21.35	20.35	28.9	30.7
GLITTER!: Minimum detection limits (99% confidence).
Element			Nist-610a	Nist-610b	Nist-610c	Nist-610d
Mg24			0.0484	0.0584	0.0629	0.06
P31			4.34	4.25	4.67	4.88
Sc45			0.0443	0.0446	0.0451	0.0436
Ti48			0.0273	0.032	0.0318	0.0343
V51			0.0486	0.0507	0.0571	0.0516
Mn55			0.093	0.0928	0.0953	0.0994
Fe57			4.24	4.33	4.27	4.16
Ga69			0.0187	0.0219	0.027	0.0196
Ge70			0.0946	0.122	0.0985	0.128
As75			0.206	0.221	0.208	0.261
Rb85			0.0213	0.0207	0.0217	0.025
Sr88			0.0107	0.00831	0.0102	0.0138
Y89			0.00808	0.00697	0.0145	0.00532
Zr90			0.0107	0.0115	0.00983	0.0152
Nb93			0.00797	0.00667	0.00717	0.00943
Ba137			0.114	0.0994	0.105	0.111
La139			0.00963	0.0156	0.0137	0.0115
Ce140			0.0127	0.0134	0.0111	0.013
Pr141			0.00761	0.00764	0.00697	0.00814
Nd145			0.101	0.083	0.108	0.0775
Sm147			0.0455	0.0523	0.0484	0.0496
Eu151			0.0145	0.0183	0.0166	0.0173
Gd157			0.0563	0.0414	0.0506	0.0518
Tb159			0.00831	0.00949	0.00734	0.00724
Dy163			0.0346	0.0289	0.0333	0.0399
Ho165			0.00977	0.00997	0.00866	0.0091
Er166			0.0217	0.0211	0.0228	0.0217
Tm169			0.00624	0.00806	0.00729	0.00819
Yb173			0.0486	0.0442	0.0532	0.0586
Lu175			0.00821	0.00907	0.00879	0.00861
Hf179			0.0361	0.0627	0.0452	0.0468
Ta181			0.00787	0.00771	0.00668	0.00702
Pb208			0.0123	0.0124	0.00999	0.0135
Th232			0.00199	<0.00000	<0.00000	0.00353
U238			<0.00000	0.00195	0.00207	0.00485

## Sheet: SG3. Qual.Control. Std_pl_ap
Quality-control standards
All values are reported in ppm
Trace Element Concentrations (MDL filtered).
routine			pl	ap
Sample	BHVO-2G- Ref. Values		33	41
Element	Concent.	(2-sigma)	BHVO-2Gb	BHVO-2Gb
Li7	4.4	0.8	4.56
Mg25	42995.8	120.605		40266.8
Sc45	33	2	39.38	27.65
Ti49	16300	900	22760	9551.14
V51	308	19	341.42	320.43
Mn55	1315.73	232.188	1385.7	1259.44
Fe57	87834.7	777.298	48416.7	75683.5
Zn66	102	6	104.06
Ga71	22	3	21.32	22.18
Rb85	9.2	0.04	9.21	9.22
Sr88	396	1	419.92	374.92
Y89	26	2	28.46	21.02
Zr90	170	7	181.51	143.43
Nb93	18.3	0.8	19.52	15.19
Cs133	0.1	0.02	0.0935
Ba137	131	2	130.25	118.87
La139	15.2	0.2	17.24	14.88
Ce140	37.6	0.2	39.94	35.72
Pr141	5.35	0.22	5.83	4.73
Nd143	24.5	0.2	28.31	22.92
Sm147	6.1	0.03	6.56	5.47
Eu151	2.07	0.01	2.188	1.997
Gd157	6.16	0.05	6.91	5.11
Tb159	0.92	0.04	1.036	0.816
Dy161	5.28	0.05	6.34	4.65
Ho165	0.98	0.04	1.11	0.825
Er166	2.56	0.02	2.91	2.09
Tm169	0.34	0.02	0.394	0.275
Yb173	2.01	0.02	2.47	1.716
Lu175	0.279	0.003	0.331	0.253
Hf179	4.32	0.18	4.87	3.53
Ta181	1.15	0.1	1.378	0.858
Pb208	1.7	0.2	1.656	2.036
Th232	1.22	0.05	1.411	1.133
U238	0.403	0.003	0.436	0.428
GLITTER!: 1 sigma error.
Element			BHVO-2Gb	BHVO-2Gbc
Li7			0.27
Mg25				1457.95
Sc45			2.19	1
Ti49			1429.4	523.87
V51			30.6	11.69
Mn55			112.32	38.62
Fe57			4368.31	3684.33
Zn66			7.55
Ga71			1.29	1.46
Rb85			0.48	0.48
Sr88			18.59	26.54
Y89			1.21	0.76
Zr90			8.16	4.76
Nb93			0.92	0.72
Cs133			0.0067
Ba137			5.64	7.22
La139			0.63	0.79
Ce140			2.05	1.61
Pr141			0.27	0.19
Nd143			1.68	1.09
Sm147			0.29	0.29
Eu151			0.082	0.079
Gd157			0.34	0.22
Tb159			0.056	0.052
Dy161			0.28	0.25
Ho165			0.038	0.035
Er166			0.11	0.082
Tm169			0.02	0.017
Yb173			0.12	0.092
Lu175			0.016	0.013
Hf179			0.26	0.15
Ta181			0.076	0.041
Pb208			0.088	0.092
Th232			0.054	0.057
U238			0.027	0.028
GLITTER!: Minimum detection limits (99% confidence).
Element			BHVO-2Gb	BHVO-2Gbc
Li7			0.0338
Mg25			0.475	0.0395
Sc45			0.0246	0.0305
Ti49			0.212	0.023
V51			0.0159	0.0364
Mn55			0.0457	0.0716
Fe57			1.13	3.05
Zn66			0.213
Ga71			0.00818	0.0165
Rb85			0.0113	0.0141
Sr88			0.00404	0.00501
Y89			0.00532	0.00521
Zr90			0.00584	0.0118
Nb93			0.00323	0.00497
Cs133			0.00389
Ba137			0.0366	0.0596
La139			0.00436	0.00779
Ce140			0.00413	0.00997
Pr141			0.00345	0.00484
Nd143			0.0297	0.0747
Sm147			0.0263	0.0361
Eu151			0.00796	0.0129
Gd157			0.0259	0.0313
Tb159			0.0041	0.00563
Dy161			0.0275	0.0218
Ho165			0.0043	0.00636
Er166			0.0154	0.0173
Tm169			0.00399	0.00571
Yb173			0.0257	0.0326
Lu175			0.0051	0.00594
Hf179			0.0306	0.039
Ta181			0.0063	0.00511
Pb208			0.00695	0.00757
Th232			<0.00000	0.00209
U238			<0.00000	<0.00000

## Sheet: SG4. Pl_PN composition
Plagioclase analyses
Intrusion	EI	EI
Sample	31f	33-D
mineral	Pl	Pl
Grain/Analysis	Pl9H	Pl1
Zone	C1	C2
mass %
SiO2	48.54	53.29
Al2O3	32.94	29.49
Fe2O3	0.28	0.29
CaO	15.68	11.34
BaO	<LLOD	<LLOD
SrO		0.47
Na2O	2.61	4.76
K2O	0.05	0.15
Total	100.1	99.79
An	0.766	0.563
Ab	0.231	0.428
Or	0.003	0.009
ppm
Li7	23.95	<LLOD
Sc45	0.525	0.429
Ti49	612	989
V51	1.267	1.61
Mn55	39.43	15.08
Fe57	2131	1290
Zn66	3.17	2.93
Ga71	25.1	25.5
Rb85	3.97	1.025
Sr88	4050	3808
Y89	1.352	0.408
Zr90	71.27	0.685
Nb93	2.52	0.252
Cs133	0.124	0.008
Ba137	316	805
La139	14.3	9.1
Ce140	20.7	13.1
Pr141	1.9	1.2
Nd143	6.4	3.9
Sm147	0.8	0.4
Eu151	1.4	1.7
Gd157	0.6	0.3
Tb159	0.1	0.0251
Pb208	6.42	1.255
Th232	1.288	0.013
U238	0.183	0.003
LLOD (lower limit of detection)
GLITTER!: 1 sigma error.
Element	Pl9H	Pl1
Li7	0.89	0.036
Sc45	0.034	0.044
Ti49	30.07	51.84
V51	0.057	0.13
Mn55	1.78	1
Fe57	118.26	94.93
Zn66	0.23	0.4
Ga71	0.94	1.32
Rb85	0.16	0.064
Sr88	182.55	149.06
Y89	0.071	0.03
Zr90	2.89	0.054
Nb93	0.11	0.023
Cs133	0.01	0.0038
Ba137	15.82	31.06
La139	0.55	0.32
Ce140	0.9	0.58
Pr141	0.11	0.057
Nd143	0.42	0.26
Sm147	0.073	0.055
Eu151	0.087	0.077
Gd157	0.05	0.051
Tb159	0.0064	0.0068
Pb208	0.3	0.079
Th232	0.065	0.0048
U238	0.011	0.0017
GLITTER!: Minimum detection limits (99% confidence).
Element	Pl9H	Pl1
Li7	0.0173	0.07
Sc45	0.0215	0.0436
Ti49	0.0836	0.375
V51	0.00849	0.0267
Mn55	0.0408	0.0769
Fe57	1.3	1.98
Zn66	0.0966	0.424
Ga71	0.00309	0.0113
Rb85	0.00636	0.0185
Sr88	0.00265	0.00884
Y89	0.00404	0.00678
Zr90	0.00694	0.0171
Nb93	0.00176	0.00651
Cs133	0.00344	0.00824
Ba137	0.0299	0.0561
La139	0.00284	0.00666
Ce140	0.00273	0.00683
Pr141	0.00306	0.00581
Nd143	0.0165	0.0489
Sm147	0.0173	0.0388
Eu151	0.00433	0.0141
Gd157	0.0121	0.0443
Tb159	0.00214	0.00844
Pb208	0.00526	0.0104
Th232	<0.00000	0.00231
U238	<0.00000	<0.00000
LLOD (lower

## Sheet: SG5. Ap_PN composition
Apatite analyses
Intrusion	NI	NI	NI
Sample	41a3	41a3	41a3
mineral	Ap	Ap	Ap
Grain/Analysis	ap_3	ap_4	ap_5
Zone	ap_3r41a	ap_r41a	ap_r41a
mass %
MgO	0.13	0.16	0.16
CaO	55.21	55.17	54.97
P2O5	40.71	40.91	40.92
FeO	0.14	0.16	0.14
MnO	0.02	0.04	0.01
Ce2O3	0.22	0.21	0.17
La2O3	0.1	0.11	0.13
Nd2O3	0.06	0.06	0.08
F	2.79	2.75	2.93
Cl	0.47	0.42	0.4
ppm
Mg24	843	522	879
Sc45	0.284	0.22	0.33
Ti48	842.98	818.54	825.63
V51	28.58	21.21	29.44
Mn55	215.67	167.25	197.62
Fe57	1167.68	849.04	1166.69
Ga69	0.82	0.65	0.709
Rb85	0.086	0.375	0.137
Sr88	2768	2058	2473
Y89	232.49	438.08	320
Zr90	14.53	23.39	17.13
Nb93	0.241	0.302	0.122
Ba137	61.13	29.64	58.95
La139	715	1627	949
Ce140	1550	3022	1909
Pr141	169	324	214
Nd145	718	1286	930
Sm147	133	221	167
Eu151	36	46.5	42.1
Gd157	104	174	135
Tb159	11.7	20.6	15.7
Dy163	55.7	98.1	73.7
Ho165	8.9	16	11.3
Er166	17.1	32.6	23
Tm169	1.7	3.5	2.4
Yb173	9.1	17.6	12.4
Lu175	1	2	1.4
Hf179	0.214	0.443	0.348
Pb208	1.021	1.759	1.069
Th232	14.18	30.42	16.71
U238	3.63	7.1	3.89
GLITTER!: 1 sigma error.
Element	ap_3r41a	ap_r41a	ap_r41a
Mg24	29.55	18.51	31.37
Sc45	0.023	0.024	0.025
Ti48	38.23	39.13	42.08
V51	0.98	0.75	1.05
Mn55	6.58	5.13	6.04
Fe57	48.94	37.56	53.79
Ga69	0.054	0.053	0.053
Rb85	0.012	0.03	0.015
Sr88	156.28	123.89	160.76
Y89	7.79	14.96	11.18
Zr90	0.48	0.78	0.57
Nb93	0.016	0.022	0.011
Ba137	3.1	1.69	3.38
La139	31.5	75.05	46.4
Ce140	60.4	122.1	80.71
Pr141	6.03	11.85	8.09
Nd145	28.33	52.73	39.99
Sm147	5.45	9.43	7.49
Eu151	1.18	1.55	1.41
Gd157	3.63	6.23	4.96
Tb159	0.58	1.08	0.88
Dy163	2.38	4.38	3.47
Ho165	0.3	0.56	0.4
Er166	0.55	1.06	0.75
Tm169	0.077	0.16	0.11
Yb173	0.35	0.69	0.49
Lu175	0.038	0.075	0.052
Hf179	0.033	0.056	0.041
Pb208	0.05	0.088	0.055
Th232	0.57	1.27	0.73
U238	0.18	0.36	0.21
GLITTER!: Minimum detection limits (99% confidence).
Element	ap_3r41a	ap_r41a	ap_r41a
Mg24	0.037	0.033	0.0752
Sc45	0.0324	0.0249	0.0329
Ti48	0.0209	0.0191	0.0293
V51	0.0363	0.0291	0.0413
Mn55	0.0658	0.0537	0.0756
Fe57	3	2.37	3.21
Ga69	0.0151	0.0146	0.0189
Rb85	0.0151	0.0112	0.0144
Sr88	0.00851	0.00609	0.0117
Y89	0.0055	0.0048	0.00422
Zr90	0.0118	0.00697	0.012
Nb93	0.00535	0.00358	0.00514
Ba137	0.0757	0.0325	0.0758
La139	0.00625	0.00692	0.0116
Ce140	0.00923	0.00724	0.0109
Pr141	0.00523	0.00517	0.00532
Nd145	0.0532	0.0486	0.0861
Sm147	0.0367	0.0227	0.0411
Eu151	0.013	0.0115	0.0123
Gd157	0.0348	0.025	0.0418
Tb159	0.00601	0.00407	0.00736
Dy163	0.0255	0.0179	0.0271
Ho165	0.00546	0.00539	0.00702
Er166	0.0192	0.0137	0.0152
Tm169	0.00411	0.00442	0.00521
Yb173	0.0436	0.0212	0.0345
Lu175	0.00628	0.00515	0.00533
Hf179	0.0393	0.0272	0.036
Pb208	0.0112	0.00849	0.0127
Th232	0.00145	0.00161	0.0023
U238	0.002	<0.00000	<0.00000
